# Supplementary material
Source: publisher figshare collection journal article supplement (https://diabetesjournals.figshare.com/articles/dataset/_/19607322)
Supplement: Supplementary file 1 [file 2]

## Supplementary Table 6: Kolmogorov-Smirnov test for normal Gaussian distribution of data

Normality indicated by "Yes" below ( $P > 0.05$ ).

Statistical analysis of normally distributed data was performed using the two-tailed unpaired Student's t-test

Statistical analysis of non-normally distributed data was performed using the Mann-Whitney test

### Islets (Fig. 2A-E)

| Gene          | 10 day NOD.B10 | 10 day NOD |  | 4 week NOD.B10 | 4 week NOD |  | 12 week NOD.B10 | 12 week NOD |
|---------------|----------------|------------|--|----------------|------------|--|-----------------|-------------|
| <i>Ins2</i>   | Yes            | Yes        |  | Yes            | Yes        |  | Yes             | No          |
| <i>Irfng</i>  | No             | Yes        |  | Yes            | Yes        |  | Yes             | Yes         |
| <i>Cd4</i>    | No             | Yes        |  | Yes            | Yes        |  | Yes             | Yes         |
| <i>Suclg2</i> | Yes            | Yes        |  | Yes            | Yes        |  | Yes             | Yes         |
| <i>Sdc2</i>   | Yes            | Yes        |  | Yes            | Yes        |  | Yes             | Yes         |

### Pancreas (Fig. 2F-J)

| Gene          | E17 NOD.B10 | E17 NOD |  | 10 day NOD.B10 | 10 day NOD |  | 4 week NOD.B10 | 4 week NOD |  | 12 week NOD.B10 | 12 week NOD |
|---------------|-------------|---------|--|----------------|------------|--|----------------|------------|--|-----------------|-------------|
| <i>Ins2</i>   | Yes         | No      |  | Yes            | Yes        |  | Yes            | Yes        |  | Yes             | Yes         |
| <i>Irfng</i>  | No          | No      |  | Yes            | No         |  | Yes            | Yes        |  | Yes             | Yes         |
| <i>Cd4</i>    | No          | No      |  | Yes            | No         |  | No             | Yes        |  | Yes             | No          |
| <i>Suclg2</i> | No          | No      |  | Yes            | Yes        |  | Yes            | Yes        |  | No              | Yes         |
| <i>Sdc2</i>   | Yes         | No      |  | Yes            | Yes        |  | Yes            | Yes        |  | Yes             | Yes         |

### 10 day old Islets (Fig. 3D and E)

| Gene        | 10 day NOD.B10 | 10 day NOD |
|-------------|----------------|------------|
| <i>Gipr</i> | Yes            | Yes        |
| <i>Gcgr</i> | Yes            | Yes        |

### 4 week old Islets (Fig. 5F)

| Gene             | 4 week NOD.B10 | 4 week NOD |
|------------------|----------------|------------|
| <i>Olfir410</i>  | Yes            | Yes        |
| <i>Olfir1428</i> | Yes            | Yes        |
| <i>Olfir15</i>   | No             | Yes        |

### 12 week old Islets (Fig. 6E and F)

| Gene         | 12 week NOD.B10 | 12 week NOD |
|--------------|-----------------|-------------|
| <i>Defb1</i> | Yes             | Yes         |
| <i>Hamp</i>  | No              | Yes         |

### 12 week old Pancreas (Fig. 8 A-D)

|              | 12 week NOD.B10 | 12 week NOD |
|--------------|-----------------|-------------|
| <i>Hamp</i>  | Yes             | Yes         |
| Hepcidin-1   | Yes             | No          |
| Total Iron   | Yes             | Yes         |
| Ferrous iron | Yes             | Yes         |
| Ferric Iron  | Yes             | Yes         |
| Ferritin     | No              | No          |
