# Supplementary material
Source: publisher figshare collection journal article supplement (https://diabetesjournals.figshare.com/articles/dataset/_/19607322)
Supplement: Supplementary file 2 [file 2]

A KEGG 4740: Olfactory Transduction

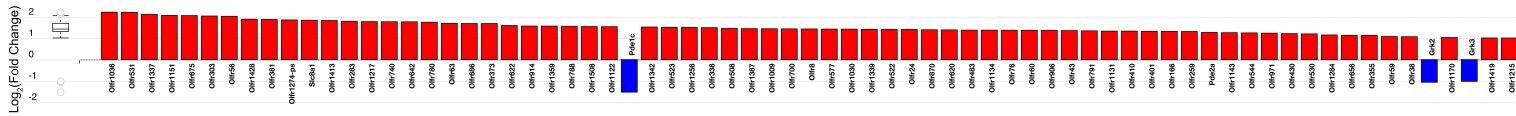

A KEGG 4659: Th17 Cell differentiation (P =  $1.12 \times 10^{-8}$ )

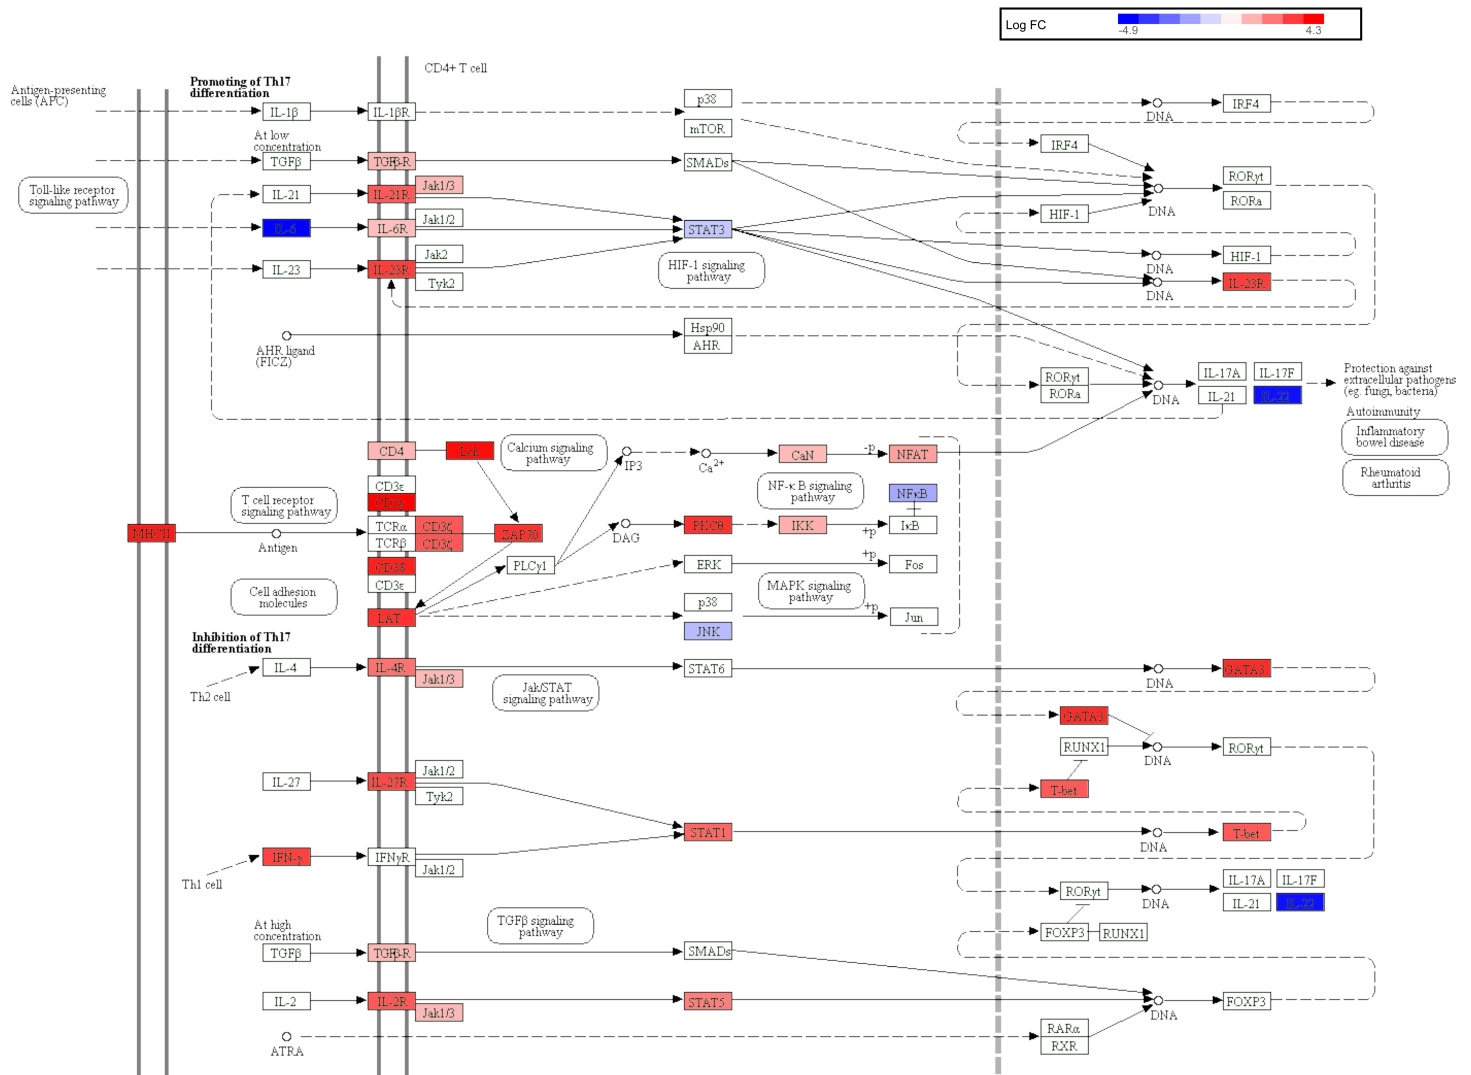



B

KEGG 4650: Natural killer cell-mediated cytotoxicity ( $P = 1.12 \times 10^{-8}$ )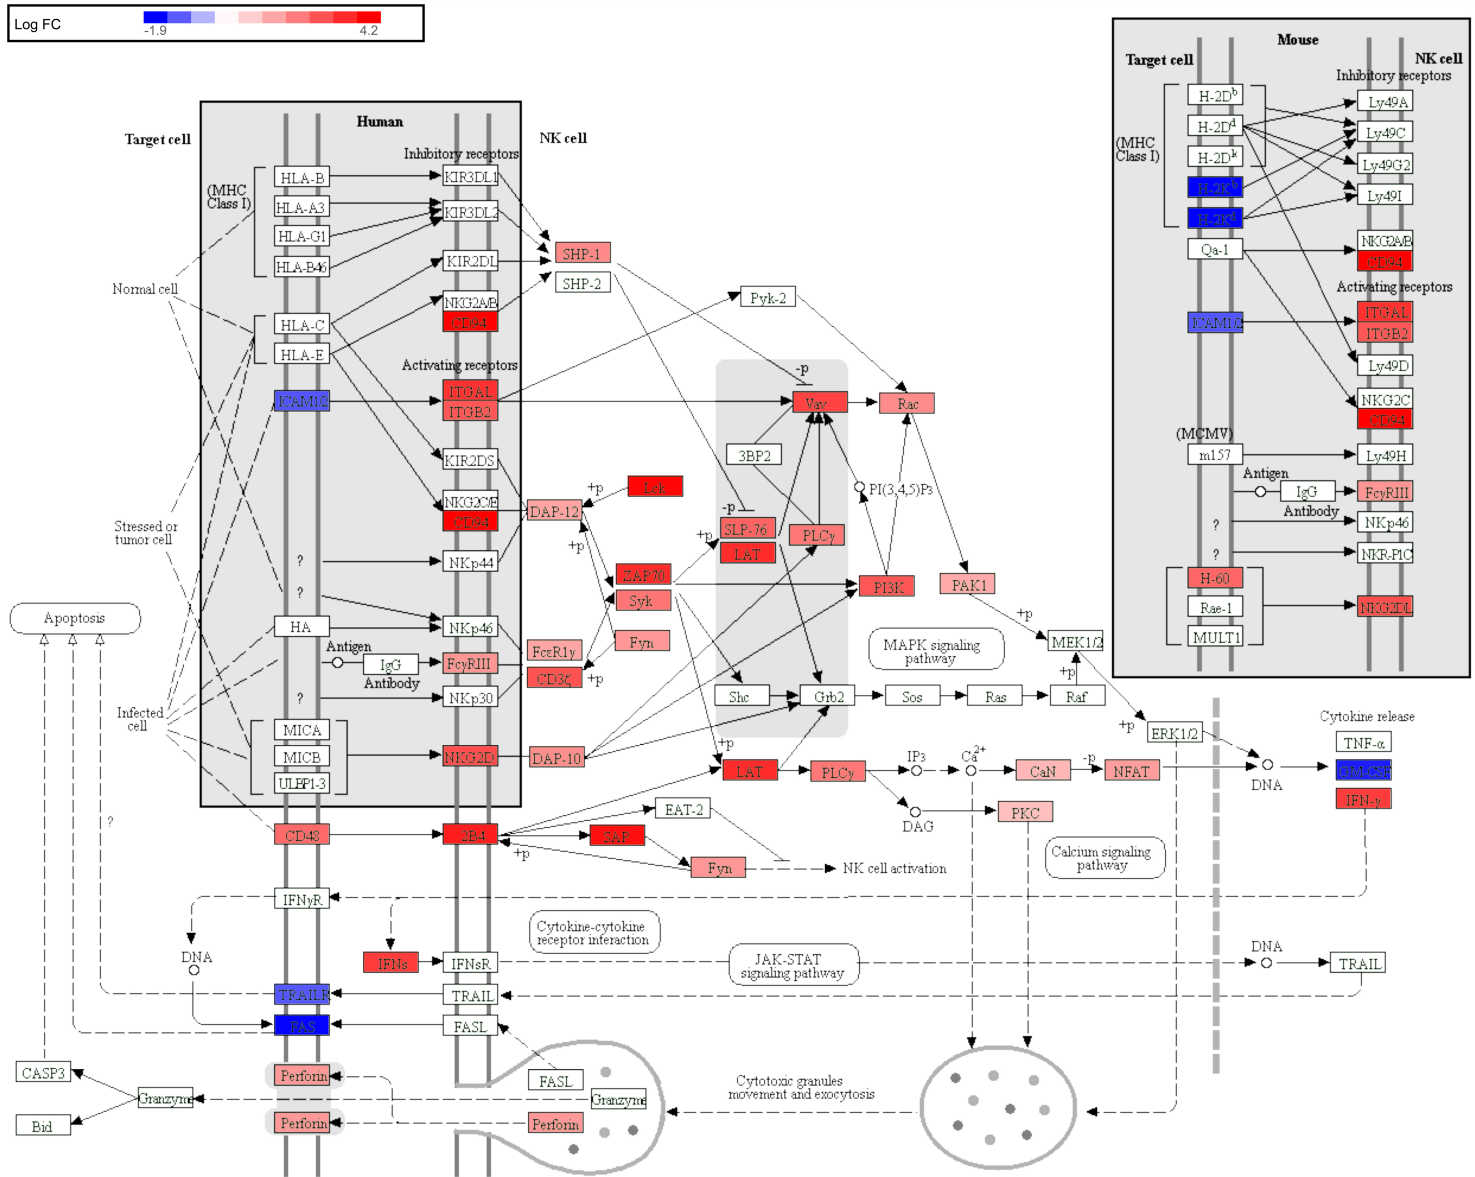

C

KEGG 4660: T cell receptor signaling pathway (P = 6.61 x 10<sup>-7</sup>)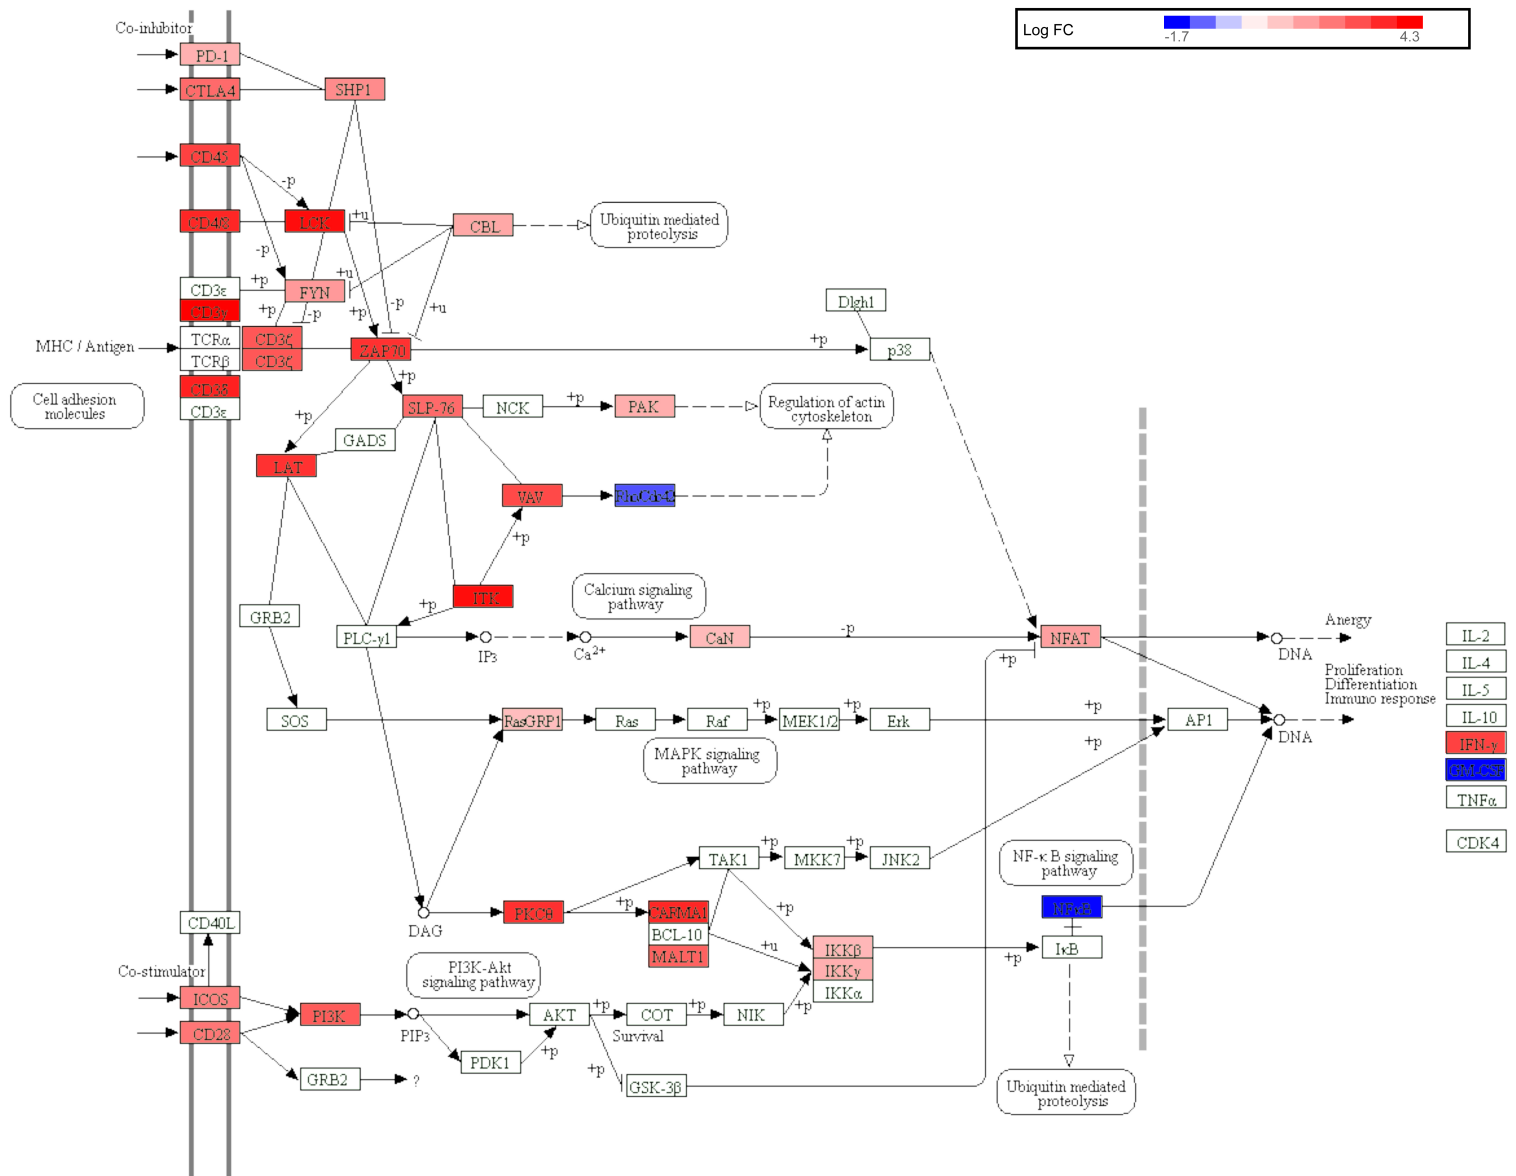

**Supplementary Fig. 2:** Genes in KEGG pathways 4659 (Th17 Cell differentiation; **A**), 4650 (Natural killer cell-mediated cytotoxicity; **B**), and 4660 (T cell receptor signaling; **C**) that are significantly changed in the islets of 12 week old NOD vs. NOD.B10 mice. Figures were generated using iPathwayGuide (AdvaitaBio.com).

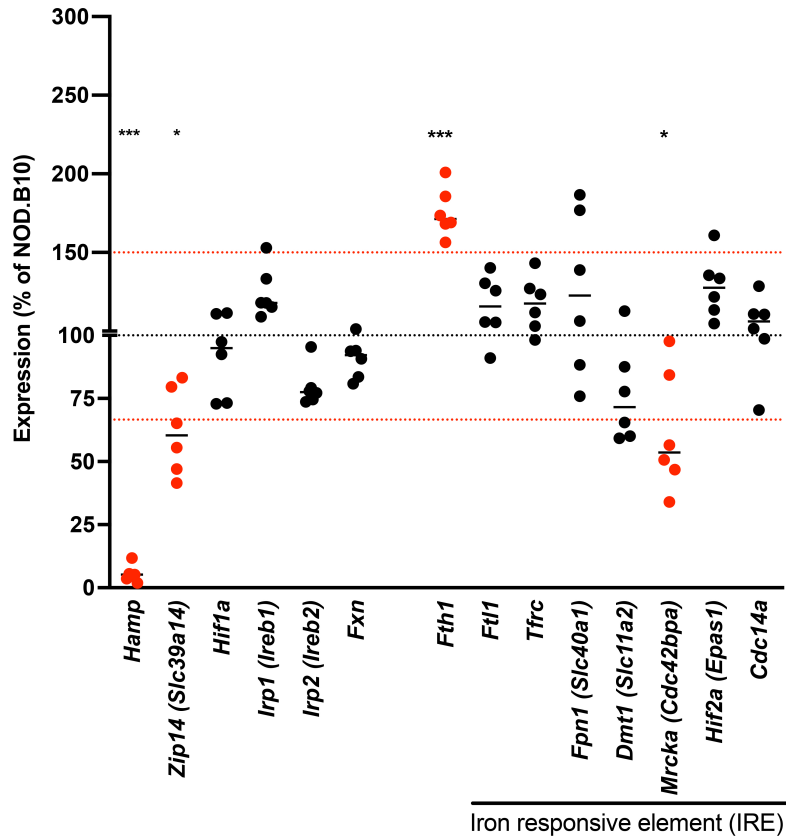

| Gene                    | Fold Change | p (corrected) | Description                                  |
|-------------------------|-------------|---------------|----------------------------------------------|
| <i>Hamp</i>             | -20.93      | 0.0012        | hepcidin antimicrobial peptide               |
| <i>Zip14 (Slc39a14)</i> | -1.67       | 0.0207        | Solute Carrier Family 39 Member 14           |
| <i>Hif1a</i>            | -1.09       | 0.4085        | Hypoxia Inducible Factor 1 Subunit Alpha     |
| <i>Irf1 (Ireb1)</i>     | 1.24        | 0.0243        | Iron Responsive Element Binding Protein 1    |
| <i>Irf2 (Ireb2)</i>     | -1.26       | 0.0083        | Iron Responsive Element Binding Protein 2    |
| <i>Fxn</i>              | -1.11       | 0.0646        | Frataxin                                     |
| <i>Fth1</i>             | 1.75        | 0.0007        | Ferritin Heavy Chain 1                       |
| <i>Ftl</i>              | 1.15        | 0.1455        | Ferritin Light Chain                         |
| <i>Tfrc</i>             | 1.17        | 0.0829        | Transferrin Receptor                         |
| <i>Fpn1 (Slc40a1)</i>   | 1.22        | 0.3363        | Ferroportin 1                                |
| <i>Dmt1 (Slc11a2)</i>   | -1.33       | 0.0758        | Divalent Metal Transporter 1                 |
| <i>Mrcka (Cdc42bpa)</i> | -1.73       | 0.0439        | Myotonic Dystrophy Protein Kinase-Like Alpha |
| <i>Hif2a (Eps1)</i>     | 1.27        | 0.0307        | Hypoxia-Inducible Factor 2 Alpha             |
| <i>Cdc14a</i>           | 1.02        | 0.8781        | Cell Division Cycle 14A                      |

**Supplementary Fig. 3:** Microarray data showing the expression of various iron regulatory genes and iron responsive element (IRE)-containing genes in 12 week old NOD vs. NOD.B10 islets. Only *Hamp* levels were changed by >2-fold, while *Zip14*, *Fth1*, and *Mrcka* levels were changed by >1.5-fold (indicated by red dotted lines). Corrected p-value < 0.05\*; < 0.001\*\*.

## Supplementary Fig. 4

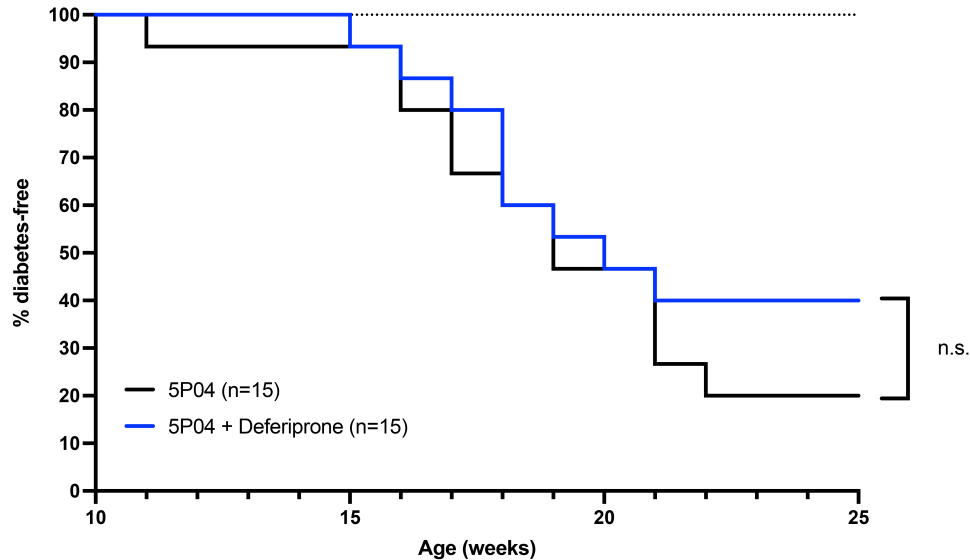

**Supplementary Fig. 4:** Iron chelation on disease progression in NOD mice. NOD mice were maintained on the standard 5P04 diet and given free access to water or water containing 0.2 mg/ml of the iron chelator deferiprone (~40 mg/kg/day, based on daily drinking volumes of 5 ml/25 g mouse). Deferiprone treatment had no significant effect on disease progression.
