# Supplementary material
Source: publisher figshare collection journal article supplement (https://diabetesjournals.figshare.com/articles/dataset/_/19607322)
Supplement: Supplementary file 3 [file 2]

**Supplementary Table 3 - Genes changed by at least 5 fold in NOD islets**

**Upregulated ≥5-fold in 10 day old NOD vs. NOD.B10 islets**

| Probe         | Gene          | Fold change | Chromosome | Start     | End       | Description                                                                       |
|---------------|---------------|-------------|------------|-----------|-----------|-----------------------------------------------------------------------------------|
| A_51_P122867  | Syt16         | 13.63       | chr12      | 75368123  | 75368182  | synaptotagmin XVI                                                                 |
| A_52_P338376  | Kctd18        | 10.54       | chr1       | 58018204  | 58018263  | potassium channel tetramerisation domain containing 18                            |
| A_51_P279284  | BC051142      | 10.43       | chr17      | 34596840  | 34596899  | cDNA sequence BC051142                                                            |
| A_52_P426740  | Rab27a        | 9.65        | chr9       | 72944668  | 72944727  | RAB27A, member RAS oncogene family                                                |
| A_52_P373575  | A530058N18Rik | 9.39        | chr2       | 113857267 | 113857326 | RIKEN cDNA A530058N18 gene                                                        |
| A_52_P569023  | Sphkap        | 9.06        | chr1       | 83272326  | 83272385  | SPHK1 interactor, AKAP domain containing                                          |
| A_51_P435617  | Best3         | 9.02        | chr10      | 116432899 | 116432958 | bestrophin 3                                                                      |
| A_51_P325941  | Kcnj12        | 8.84        | chr11      | 60884085  | 60884143  | potassium inwardly-rectifying channel, subfamily J, member 12                     |
| A_52_P97133   | Mapk8ip3      | 8.84        | chr17      | 25052986  | 25053045  | mitogen-activated protein kinase 8 interacting protein 3                          |
| A_52_P460791  | Ppy           | 8.83        | chr11      | 101961581 | 101961877 | pancreatic polypeptide                                                            |
| A_52_P355124  | Ppp1r17       | 8.48        | chr6       | 55982358  | 55982417  | protein phosphatase 1, regulatory subunit 17                                      |
| A_51_P503729  | Elavl4        | 8.47        | chr4       | 109884183 | 109884242 | ELAV                                                                              |
| A_51_P335801  | Calb1         | 8.15        | chr4       | 15832543  | 15832602  | calbindin 1                                                                       |
| A_52_P281935  | Ppp6r3        | 7.95        | chr19      | 3511402   | 3511461   | AK129392 mKIAA1558 protein {Mus musculus}                                         |
| A_52_P17635   | Tmem258       | 7.89        | chr19      | 10281979  | 10282038  | CK010_HUMAN UPF0197 protein C11orf10, complete                                    |
| A_51_P282538  | Gad1          | 7.86        | chr2       | 70439601  | 70439660  | glutamate decarboxylase 1                                                         |
| A_52_P92398   | Bbs12         | 7.76        | chr3       | 37219515  | 37219574  | Bardet-Biedl syndrome 12                                                          |
| A_51_P268709  | Mc4r          | 7.73        | chr18      | 67019044  | 67019103  | melanocortin 4 receptor                                                           |
| A_51_P428483  | Fgb           | 7.66        | chr3       | 82846334  | 82846393  | fibrinogen beta chain                                                             |
| A_52_P192528  | Vwde          | 7.63        | chr6       | 13119962  | 13120021  | von Willebrand factor D and EGF domains                                           |
| A_51_P166740  | Kcnj4         | 7.48        | chr15      | 79314133  | 79314157  | potassium inwardly-rectifying channel, subfamily J, member 4                      |
| A_52_P778544  | C030034I22Rik | 7.26        | chr17      | 69767454  | 69767513  | RIKEN cDNA C030034I22 gene                                                        |
| A_52_P134680  | Spta7         | 7.23        | chr12      | 99867893  | 99867952  | spermatogenesis associated 7                                                      |
| A_51_P521155  | Fbxw27        | 6.91        | chr9       | 109672589 | 109672648 | F-box and WD-40 domain protein 27                                                 |
| A_51_P133260  | Vsnl1         | 6.62        | chr12      | 11333097  | 11333156  | visinin-like 1                                                                    |
| A_51_P258473  | Jhy           | 6.62        | chr9       | 40703592  | 40703651  | juvenile hydrocephalus                                                            |
| A_52_P452578  | Rbm8a         | 6.60        | chr3       | 96435936  | 96435995  | RNA binding motif protein 8a                                                      |
| A_51_P332228  | Nol4          | 6.50        | chr18      | 22852395  | 22852454  | nucleolar protein 4                                                               |
| A_51_P403477  | Dio1          | 6.49        | chr4       | 106964052 | 106964088 | deiodinase, iodothyronine, type I                                                 |
| A_51_P197816  | Ltv1          | 6.47        | chr10      | 12898223  | 12898282  | LTV1 ribosome biogenesis factor                                                   |
| A_52_P181408  | Dpp10         | 6.45        | chr1       | 125546865 | 125546924 | dipeptidylpeptidase 10                                                            |
| A_52_P575176  | Gria2         | 6.43        | chr3       | 80492452  | 80492511  | glutamate receptor, ionotropic, AMPA2                                             |
| A_52_P564827  | BC023719      | 6.35        | chr17      | 36253180  | 36253239  | Q8HWL1_MOUSE H2-Q10 protein, partial                                              |
| A_52_P501805  | Iws1          | 6.20        | chr18      | 32246790  | 32247952  | IWS1, SUPT6 interacting protein                                                   |
| A_52_P265666  | Fyco1         | 6.18        | chr9       | 123747405 | 123747464 | FYVE and coiled-coil domain containing 1                                          |
| A_52_P522754  | Ebna1bp2      | 6.14        | chr4       | 118299837 | 118299896 | EBNA1 binding protein 2                                                           |
| A_52_P487615  | Fam105a       | 6.10        | chr15      | 27586750  | 27586809  | family with sequence similarity 105, member A                                     |
| A_52_P29615   | Rab27a        | 6.08        | chr9       | 72943705  | 72943764  | RAB27A, member RAS oncogene family                                                |
| A_52_P238468  | Gipr          | 6.05        | chr7       | 19742486  | 19742545  | gastric inhibitory polypeptide receptor                                           |
| A_51_P515949  | Olfir668      | 6.01        | chr7       | 112073475 | 112073534 | olfactory receptor 668                                                            |
| A_52_P144310  | Gad1          | 5.96        | chr2       | 70439699  | 70439758  | glutamate decarboxylase 1                                                         |
| A_52_P656667  | Dbpht2        | 5.92        | chr12      | 75400186  | 75400245  | DNA binding protein with his-thr domain                                           |
| A_51_P389543  | Adgrv1        | 5.86        | chr13      | 81409792  | 81409851  | adhesion G protein-coupled receptor V1                                            |
| A_51_P306308  | Wdr17         | 5.85        | chr8       | 55715048  | 55715107  | WD repeat domain 17                                                               |
| A_51_P201747  | Sez6l         | 5.83        | chr5       | 112848874 | 112848933 | seizure related 6 homolog like                                                    |
| A_52_P235108  | Vps35         | 5.80        | chr8       | 87810345  | 87810403  | VPS35 retromer complex component                                                  |
| A_51_P433810  | Npas4         | 5.78        | chr19      | 4984833   | 4984892   | neuronal PAS domain protein 4                                                     |
| A_51_P374137  | Bco1          | 5.74        | chr8       | 119656996 | 119657055 | beta-carotene oxygenase 1                                                         |
| A_52_P1114696 | 9030419F21Rik | 5.73        | chr15      | 88910246  | 88910305  | Q4T065_TETNG Chromosome undetermined SCAF11328.                                   |
| A_52_P459657  | Pcsk1n        | 5.71        | chrX       | 7500858   | 7500917   | proprotein convertase subtilisin/kexin type 1 inhibitor                           |
| A_52_P28745   | Scgn          | 5.69        | chr13      | 24054004  | 24054661  | secretagogin, EF-hand calcium binding protein                                     |
| A_51_P518919  | Cdh7          | 5.69        | chr1       | 112035318 | 112035377 | cadherin 7, type 2                                                                |
| A_52_P278853  | Trim34a       | 5.67        | chr7       | 111410060 | 111410119 | tripartite motif-containing 34A                                                   |
| A_52_P38317   | Naa20         | 5.65        | chr2       | 145737523 | 145737582 | N(alpha)-acetyltransferase 20, NatB catalytic subunit                             |
| A_51_P204387  | Tmem63c       | 5.64        | chr12      | 88430848  | 88430907  | transmembrane protein 63c                                                         |
| A_51_P327970  | Scg2          | 5.64        | chr1       | 79432019  | 79432078  | secretogranin II                                                                  |
| A_52_P488623  | Fam169a       | 5.63        | chr13      | 97899009  | 97899068  | family with sequence similarity 169, member A                                     |
| A_52_P577190  | Galnt13       | 5.58        | chr2       | 54951071  | 54951253  | UDP-N-acetyl-alpha-D-galactosamine:polypeptide N-acetylglucosaminyltransferase 13 |
| A_51_P340805  | Zkscan4       | 5.57        | chr13      | 21577152  | 21577211  | zinc finger with KRAB and SCAN domains 4                                          |
| A_51_P303160  | Arg1          | 5.57        | chr10      | 24636194  | 24636253  | arginase, liver                                                                   |
| A_52_P198949  | Esr1a         | 5.57        | chr19      | 6991170   | 6991229   | estrogen related receptor, alpha                                                  |
| A_52_P149521  | Syt16         | 5.56        | chr12      | 75368497  | 75368556  | synaptotagmin XVI                                                                 |
| A_52_P121903  | Cadps         | 5.54        | chr14      | 13244085  | 13244144  | Ca2+-dependent secretion activator                                                |
| A_52_P82804   | Gnl3l         | 5.52        | chrX       | 147419264 | 147419323 | guanine nucleotide binding protein-like 3 (nucleolar)-like                        |
| A_51_P371078  | Smg5          | 5.50        | chr3       | 88155804  | 88155863  | Smg-5 homolog, nonsense mediated mRNA decay factor                                |
| A_51_P438236  | Dmrtc1a       | 5.45        | chrX       | 100098812 | 100098871 | DMRT-like family C1a                                                              |
| A_52_P592230  | Dnaj4         | 5.44        | chr9       | 54563687  | 54563746  | DnaJ heat shock protein family member A4                                          |
| A_52_P143193  | Ddx25         | 5.40        | chr9       | 35358939  | 35358998  | DEAD box polypeptide 25                                                           |
| A_51_P318618  | Anks4b        | 5.37        | chr7       | 127326703 | 127326762 | ankyrin repeat and sterile alpha motif domain containing 4B                       |
| A_52_P628915  | Syt4          | 5.29        | chr18      | 31598394  | 31598453  | synaptotagmin IV                                                                  |
| A_52_P110218  | Efcab1        | 5.28        | chr16      | 14916986  | 14917045  | EF hand calcium binding domain 1                                                  |
| A_51_P106114  | A230070E04Rik | 5.27        | chr14      | 68743911  | 68743970  | RIKEN cDNA A230070E04 gene                                                        |
| A_51_P326449  | 6030442H21Rik | 5.26        | chr2       | 64855461  | 64855520  | RIKEN cDNA 6030442H21 gene                                                        |
| A_51_P507065  | Celsr3        | 5.25        | chr9       | 108754794 | 108754853 | cadherin, EGF LAG seven-pass G-type receptor 3                                    |
| A_52_P94670   | Ift81         | 5.24        | chr5       | 123054974 | 123055033 | intraflagellar transport 81                                                       |
| A_52_P537647  | Raf1          | 5.21        | chr6       | 115580756 | 115580815 | v-raf-leukemia viral oncogene 1                                                   |
| A_52_P176405  | Arx           | 5.09        | chrX       | 90543119  | 90543178  | aristaless related homeobox                                                       |
| A_52_P158782  | Son           | 5.08        | chr16      | 91675067  | 91675126  | PREDICTED: Son DNA binding protein                                                |
| A_51_P262699  | Cpb2          | 5.07        | chr14      | 75683296  | 75683355  | carboxypeptidase B2 (plasma)                                                      |
| A_52_P981179  | Arhgef37      | 5.07        | chr18      | 61651888  | 61651947  | PREDICTED: Rho guanine nucleotide exchange factor 37                              |

|              |         |      |       |           |           |                                     |
|--------------|---------|------|-------|-----------|-----------|-------------------------------------|
| A_52_P281543 | Slc35g1 | 5.06 | chr19 | 38477465  | 38477524  | solute carrier family 35, member G1 |
| A_52_P321140 | Defb1   | 5.01 | chr8  | 22905041  | 22905100  | defensin beta 1                     |
| A_51_P221223 | Scg5    | 5.00 | chr2  | 113616611 | 113616670 | secretogranin V                     |

#### Downregulated ≥5-fold in 10 day old NOD vs. NOD.B10 islets

| Probe         | Gene        | Fold change | Chromosome | Start     | End       | Description                                                                    |
|---------------|-------------|-------------|------------|-----------|-----------|--------------------------------------------------------------------------------|
| A_51_P431329  | Car3        | -31.06      | chr3       | 14871781  | 14871840  | carbonic anhydrase 3                                                           |
| A_51_P458451  | Adipoq      | -25.83      | chr16      | 23157576  | 23157635  | adiponectin, C1Q and collagen domain containing                                |
| A_51_P244497  | Plin1       | -23.88      | chr7       | 86866112  | 86866171  | perilipin 1                                                                    |
| A_51_P117739  | Vegfd       | -19.67      | chrX       | 160840395 | 160840454 | vascular endothelial growth factor D                                           |
| A_51_P130115  | Spink2      | -19.38      | chr5       | 77634154  | 77634213  | serine peptidase inhibitor, Kazal type 2                                       |
| A_51_P490456  | Cidec       | -16.03      | chr6       | 113374693 | 113374752 | cell death-inducing DFFA-like effector c                                       |
| A_52_P681557  | Naaladl2    | -12.33      | chr3       | 23703403  | 23703462  | N-acetylated alpha-linked acidic dipeptidase-like 2                            |
| A_51_P452768  | Cyp4f14     | -11.56      | chr17      | 33042214  | 33042273  | cytochrome P450, family 4, subfamily f, polypeptide 14                         |
| A_52_P416756  | D17H6556E-5 | -10.00      | chr17      | 35134653  | 35134712  | DNA segment, Chr 17, human D6S56E 5                                            |
| A_51_P287100  | Cdh16       | -9.84       | chr8       | 107138101 | 107138160 | cadherin 16                                                                    |
| A_52_P525107  | Col1a1      | -9.02       | chr11      | 94813075  | 94813134  | collagen, type I, alpha 1                                                      |
| A_52_P276955  | Epha3       | -8.76       | chr16      | 63545155  | 63545214  | Eph receptor A3                                                                |
| A_51_P134468  | D17H6556E-5 | -7.92       | chr17      | 35134128  | 35134187  | DNA segment, Chr 17, human D6S56E 5                                            |
| A_51_P227222  | Adamts2     | -7.85       | chr11      | 50617472  | 50617531  | a disintegrin-like and metallopeptidase with thrombospondin type 1 motif, 2    |
| A_51_P417074  | Arhgap8     | -7.57       | chr15      | 84602532  | 84602591  | Rho GTPase activating protein 8                                                |
| A_51_P496569  | Slit2       | -7.56       | chr5       | 48696502  | 48696561  | slit homolog 2                                                                 |
| A_51_P103560  | Gm16486     | -7.55       | chr8       | 73240942  | 73241001  | predicted gene 16486                                                           |
| A_52_P36847   | Cpz         | -7.41       | chr5       | 35846326  | 35846385  | carboxypeptidase Z                                                             |
| A_51_P368012  | Mdfi        | -7.22       | chr17      | 47952606  | 47952665  | MyoD family inhibitor                                                          |
| A_52_P50496   | H2-K1       | -7.22       | chr17      | 34136288  | 34136347  | histocompatibility 2, K1, K region                                             |
| A_52_P1016836 | Ttc6        | -7.21       | chr12      | 58838729  | 58838788  | tetratricopeptide repeat domain 6                                              |
| A_51_P420600  | Prss35      | -7.21       | chr9       | 86650767  | 86650848  | protease, serine 35                                                            |
| A_52_P42762   | Zp3         | -7.07       | chr5       | 136464281 | 136464340 | zona pellucida glycoprotein 3                                                  |
| A_51_P152973  | Zp3         | -6.99       | chr5       | 136463460 | 136464310 | zona pellucida glycoprotein 3                                                  |
| A_51_P154417  | Fbln1       | -6.99       | chr15      | 85115854  | 85115914  | fibulin 1                                                                      |
| A_51_P520849  | Sfrp2       | -6.83       | chr3       | 83577864  | 83577923  | secreted frizzled-related protein 2                                            |
| A_51_P377094  | Col1a1      | -6.73       | chr11      | 94812052  | 94812111  | collagen, type I, alpha 1                                                      |
| A_51_P516833  | Igf2        | -6.41       | chr7       | 149837115 | 149837174 | insulin-like growth factor 2                                                   |
| A_51_P508259  | Ppm1n       | -6.37       | chr7       | 19862172  | 19862231  | protein phosphatase, Mg2+/Mn2+ dependent, 1N                                   |
| A_51_P220156  | Bpifb1      | -6.30       | chr2       | 154042941 | 154043969 | BPI fold containing family B, member 1                                         |
| A_51_P414637  | Col5a1      | -6.30       | chr2       | 27892892  | 27892951  | collagen, type V, alpha 1                                                      |
| A_51_P346964  | Mrap        | -6.28       | chr16      | 90749858  | 90749917  | melanocortin 2 receptor accessory protein                                      |
| A_52_P197826  | H2-T22      | -6.26       | chr17      | 36178425  | 36178484  | histocompatibility 2, T region locus 22                                        |
| A_51_P124535  | Mest        | -6.10       | chr6       | 30698279  | 30698338  | mesoderm specific transcript                                                   |
| A_52_P184609  | Gabrp       | -6.10       | chr11      | 33452049  | 33452108  | gamma-aminobutyric acid A receptor, pi                                         |
| A_51_P404815  | Apol6       | -6.07       | chr15      | 76887458  | 76887517  | apolipoprotein L 6                                                             |
| A_52_P476775  | Mdfi        | -6.04       | chr17      | 47952601  | 47952660  | MyoD family inhibitor                                                          |
| A_51_P160673  | Kcne1l      | -5.98       | chrX       | 138739364 | 138739423 | potassium voltage-gated channel, Isk-related family, member 1-like, pseudogene |
| A_51_P220262  | Rnf165      | -5.97       | chr18      | 77694899  | 77694958  | ring finger protein 165                                                        |
| A_51_P516826  | Igf2        | -5.96       | chr7       | 149836673 | 149836709 | insulin-like growth factor 2                                                   |
| A_51_P337412  | Efemp1      | -5.89       | chr11      | 28826538  | 28826597  | epidermal growth factor-containing fibulin-like extracellular matrix protein 1 |
| A_52_P39575   | Gria1       | -5.88       | chr11      | 57143457  | 57143516  | glutamate receptor, ionotropic, AMPA1                                          |
| A_52_P588483  | Fbln1       | -5.85       | chr15      | 85115998  | 85116057  | fibulin 1                                                                      |
| A_51_P366121  | Klf14       | -5.85       | chr6       | 30906200  | 30906259  | Kruppel-like factor 14                                                         |
| A_51_P188271  | Cd248       | -5.84       | chr19      | 5070558   | 5070617   | CD248 antigen, endosialin                                                      |
| A_51_P165504  | Twist2      | -5.78       | chr1       | 93744519  | 93744577  | twist basic helix-loop-helix transcription factor 2                            |
| A_52_P453785  | Cthrc1      | -5.58       | chr15      | 38918358  | 38918417  | collagen triple helix repeat containing 1                                      |
| A_52_P251703  | Vcan        | -5.51       | chr13      | 89796864  | 89796923  | versican                                                                       |
| A_51_P433237  | Cdh3        | -5.45       | chr8       | 109079493 | 109079553 | cadherin 3                                                                     |
| A_51_P326529  | Col14a1     | -5.41       | chr15      | 55352132  | 55352191  | collagen, type XIV, alpha 1                                                    |
| A_51_P466910  | Cacna1g     | -5.38       | chr11      | 94269863  | 94269922  | calcium channel, voltage-dependent, T type, alpha 1G subunit                   |
| A_51_P164817  | Adamts2     | -5.34       | chr11      | 50620833  | 50620892  | a disintegrin-like and metallopeptidase with thrombospondin type 1 motif, 2    |
| A_51_P437978  | Agtr2       | -5.31       | chrX       | 21065564  | 21065623  | angiotensin II receptor, type 2                                                |
| A_52_P387724  | Tcf7l1      | -5.28       | chr6       | 72576377  | 72576436  | transcription factor 7 like 1 (T cell specific, HMG box)                       |
| A_51_P227502  | Mfap2       | -5.26       | chr4       | 140571814 | 140571873 | microfibrillar-associated protein 2                                            |
| A_52_P542140  | Fam192a     | -5.13       | chr8       | 97125566  | 97125625  | family with sequence similarity 192, member A                                  |
| A_52_P2670    | Rmrp        | -5.13       | chr4       | 43505692  | 43505751  | RNA component of mitochondrial RNAase P                                        |
| A_51_P417643  | Foxa1       | -5.11       | chr12      | 58641996  | 58642055  | forkhead box A1                                                                |
| A_52_P93393   | Gxylt2      | -5.10       | chr6       | 100754978 | 100755037 | glucoside xylosyltransferase 2                                                 |
| A_51_P394814  | Svep1       | -5.10       | chr4       | 58055720  | 58055779  | sushi, von Willebrand factor type A, EGF and pentraxin domain containing 1     |
| A_52_P617638  | Nox4        | -5.04       | chr7       | 94545682  | 94545741  | NADPH oxidase 4                                                                |

#### Upregulated ≥5-fold in 4 week old NOD vs. NOD.B10 islets

| Probe         | Gene          | Fold change | Chromosome | Start     | End       | Description                                                           |
|---------------|---------------|-------------|------------|-----------|-----------|-----------------------------------------------------------------------|
| A_52_P564827  | BC023719      | 21.20       | chr17      | 36253180  | 36253239  | Q8HWL1_MOUSE H2-Q10 protein (Fragment), partial (26%)                 |
| A_51_P136303  | Cyp4f15       | 12.27       | chr17      | 32840088  | 32840147  | cytochrome P450, family 4, subfamily f, polypeptide 15                |
| A_52_P680761  | Tdrd6         | 11.05       | chr17      | 43759143  | 43759202  | tudor domain containing 6                                             |
| A_51_P339934  | Nefl          | 10.67       | chr14      | 68705638  | 68705698  | neurofilament, light polypeptide                                      |
| A_51_P168646  | Nefl          | 8.03        | chr14      | 68706866  | 68706925  | neurofilament, light polypeptide                                      |
| A_52_P1051779 | Stum          | 7.32        | chr1       | 182362524 | 182362583 | mechanosensory transduction mediator                                  |
| A_51_P444473  | Ccr4          | 6.92        | chr9       | 114400791 | 114400850 | chemokine receptor 4                                                  |
| A_51_P344606  | Prph          | 6.62        | chr15      | 98887297  | 98887356  | peripherin                                                            |
| A_52_P465064  | Pkib          | 6.57        | chr10      | 57374328  | 57374387  | protein kinase inhibitor beta, cAMP dependent, testis specific        |
| A_52_P569897  | 5430419D17Rik | 5.55        | chr7       | 138449228 | 138449287 | RIKEN cDNA 5430419D17 gene                                            |
| A_51_P365666  | Ptprh         | 5.41        | chr7       | 4502484   | 4502659   | protein tyrosine phosphatase, receptor type, H                        |
| A_52_P408736  | Slc16a7       | 5.22        | chr10      | 124663576 | 124663635 | solute carrier family 16 (monocarboxylic acid transporters), member 7 |
| A_52_P567228  | Cyp2w1        | 5.18        | chr5       | 139832563 | 139832622 | cytochrome P450, family 2, subfamily w, polypeptide 1                 |
| A_51_P164998  | Stmn2         | 5.03        | chr3       | 8561261   | 8561320   | stathmin-like 2                                                       |

# Downregulated ≥5-fold in 4 week old NOD vs. NOD.B10 islets

| Probe        | Gene          | Fold change | Chromosome | Start     | End       | Description                                            |
|--------------|---------------|-------------|------------|-----------|-----------|--------------------------------------------------------|
| A_52_P602847 | Glycam1       | -27.57      | chr15      | 103393339 | 103393398 | glycosylation dependent cell adhesion molecule 1       |
| A_51_P278868 | H2-DMb1       | -16.89      | chr17      | 34297109  | 34297168  | histocompatibility 2, class II, locus Mb1              |
| A_52_P416756 | D17H6S56E-5   | -13.87      | chr17      | 35134653  | 35134712  | DNA segment, Chr 17, human D6S56E 5                    |
| A_52_P343306 | H2-Aa         | -13.38      | chr17      | 34421285  | 34421344  | histocompatibility 2, class II antigen A, alpha        |
| A_51_P134468 | D17H6S56E-5   | -10.18      | chr17      | 35134128  | 35134187  | DNA segment, Chr 17, human D6S56E 5                    |
| A_52_P410495 | 2310057J18Rik | -9.92       | chr10      | 28692205  | 28692264  | RIKEN cDNA 2310057J18 gene                             |
| A_52_P50496  | H2-K1         | -7.35       | chr17      | 34136288  | 34136347  | histocompatibility 2, K1, K region                     |
| A_52_P836852 | Txk           | -6.99       | chr5       | 73087262  | 73087321  | TXK tyrosine kinase                                    |
| A_52_P586928 | Pdyn          | -6.50       | chr2       | 129512323 | 129512382 | prodynorphin                                           |
| A_52_P197826 | H2-T22        | -6.30       | chr17      | 36178425  | 36178484  | histocompatibility 2, T region locus 22                |
| A_51_P487818 | Fabp1         | -5.91       | chr6       | 71154906  | 71154965  | fatty acid binding protein 1, liver                    |
| A_51_P326631 | Dnah8         | -5.52       | chr17      | 31012058  | 31012117  | dynein, axonemal, heavy chain 8                        |
| A_51_P292403 | Sdc2          | -5.41       | chr15      | 32962294  | 32962353  | syndecan 2                                             |
| A_52_P655008 | Iffo1         | -5.41       | chr6       | 125096621 | 125096680 | Intermediate Filament Family Orphan 1                  |
| A_51_P324351 | Meltf         | -5.35       | chr16      | 31899002  | 31899061  | melanotransferrin                                      |
| A_52_P533841 | Cyp4f16       | -5.07       | chr17      | 32682033  | 32682092  | cytochrome P450, family 4, subfamily f, polypeptide 16 |

# Upregulated ≥5-fold in 12 week old NOD vs. NOD.B10 islets

| Probe        | Gene          | Fold change | Chromosome | Start     | End       | Description                                                |
|--------------|---------------|-------------|------------|-----------|-----------|------------------------------------------------------------|
| A_52_P480620 | Trav3-3       | 36.19       | chr14      | 54820230  | 54820289  | T cell receptor alpha variable 3-3                         |
| A_51_P319022 | Cxcr3         | 25.22       | chrX       | 98926920  | 98926979  | chemokine receptor 3                                       |
| A_51_P167263 | Cd5           | 22.38       | chr19      | 10792701  | 10792760  | CD5 antigen                                                |
| A_51_P260889 | Cd3g          | 20.05       | chr9       | 44781716  | 44782300  | CD3 antigen, gamma polypeptide                             |
| A_52_P244702 | Tcf7          | 18.76       | chr11      | 52066114  | 52066173  | transcription factor 7, T cell specific                    |
| A_51_P280947 | Klrd1         | 18.44       | chr6       | 129548391 | 129548450 | killer cell lectin-like receptor, subfamily D, member 1    |
| A_51_P137419 | Cst7          | 17.99       | chr2       | 150404490 | 150404549 | cystatin F                                                 |
| A_51_P458258 | Ccl19         | 17.80       | chr4       | 42250432  | 42250491  | chemokine ligand 19                                        |
| A_51_P141288 | Lck           | 17.48       | chr4       | 129225846 | 129225905 | lymphocyte protein tyrosine kinase                         |
| A_51_P445473 | Fut7          | 17.41       | chr2       | 25281802  | 25281861  | fucosyltransferase 7                                       |
| A_51_P342688 | Itk           | 17.30       | chr11      | 46138778  | 46138837  | IL2 inducible T cell kinase                                |
| A_52_P68893  | Ifng          | 17.10       | chr10      | 117882841 | 117882900 | interferon gamma                                           |
| A_51_P458262 | Ccl19         | 16.48       | chr4       | 42250352  | 42250411  | chemokine ligand 19                                        |
| A_51_P234956 | Xcl1          | 16.38       | chr1       | 166862020 | 166862079 | chemokine ligand 1                                         |
| A_52_P123655 | A630023P12Rik | 16.25       | chr5       | 110954673 | 110954732 | RIKEN cDNA A630023P12 gene                                 |
| A_52_P186033 | Spn           | 15.88       | chr7       | 134277313 | 134277372 | sialophorin                                                |
| A_51_P172514 | Sh2d1a        | 15.44       | chrX       | 39874920  | 39874979  | SH2 domain containing 1A                                   |
| A_51_P389957 | Rgs14         | 15.11       | chr13      | 55485762  | 55485821  | regulator of G-protein signaling 14                        |
| A_52_P618569 | Ikzf1         | 14.97       | chr11      | 11658319  | 11661278  | IKAROS family zinc finger 1                                |
| A_52_P1391   | H2-DMb2       | 14.96       | chr17      | 34284764  | 34284823  | histocompatibility 2, class II, locus Mb2                  |
| A_51_P176154 | Sirpb1b       | 14.71       | chr3       | 15495824  | 15495883  | signal-regulatory protein beta 1B                          |
| A_52_P199614 | Wdfy4         | 14.66       | chr14      | 33772821  | 33772880  | WD repeat and FYVE domain containing 4                     |
| A_52_P365466 | Plcb2         | 14.47       | chr2       | 118534571 | 118534630 | phospholipase C, beta 2                                    |
| A_52_P113190 | Myo1f         | 14.40       | chr17      | 33744253  | 33744312  | myosin IF                                                  |
| A_52_P456640 | Fgr           | 14.21       | chr4       | 132557522 | 132557581 | FGR proto-oncogene, Src family tyrosine kinase             |
| A_51_P501145 | Lef1          | 14.14       | chr3       | 130927036 | 130927095 | lymphoid enhancer binding factor 1                         |
| A_52_P443334 | Cd8a          | 13.87       | chr6       | 71328911  | 71328970  | CD8 antigen, alpha chain                                   |
| A_52_P662054 | Klra16        | 13.84       | chr6       |           |           | killer cell lectin-like receptor, subfamily A, member 16   |
| A_51_P285206 | Cd3d          | 13.82       | chr9       | 44794171  | 44794402  | CD3 antigen, delta polypeptide                             |
| A_51_P339934 | Nefl          | 13.38       | chr14      | 68705638  | 68705698  | neurofilament, light polypeptide                           |
| A_51_P359603 | Itgb7         | 13.37       | chr15      | 102046450 | 102046509 | integrin beta 7                                            |
| A_51_P205209 | Cd244         | 13.16       | chr1       | 173513231 | 173513290 | CD244 natural killer cell receptor 2B4                     |
| A_51_P345121 | Cd8a          | 12.88       | chr6       | 71327330  | 71327389  | CD8 antigen, alpha chain                                   |
| A_51_P316044 | Card11        | 12.87       | chr5       | 141348979 | 141349038 | caspase recruitment domain family, member 11               |
| A_51_P150433 | Cd8b1         | 12.83       | chr6       | 71287068  | 71287126  | CD8 Antigen, Beta Polypeptide 1                            |
| A_51_P448140 | Cd22          | 12.74       | chr7       | 31651590  | 31651649  | CD22 antigen                                               |
| A_52_P109941 | Ctla4         | 12.67       | chr16      | 10526303  | 10526362  | class II transactivator                                    |
| A_51_P495581 | Tlr1          | 12.61       | chr5       | 65316115  | 65316174  | toll-like receptor 1                                       |
| A_52_P2754   | Aif1          | 12.44       | chr17      | 35308497  | 35308742  | allograft inflammatory factor 1                            |
| A_52_P105594 | B2m           | 12.31       | chr2       | 121974599 | 121974658 | Beta-2-Microglobulin                                       |
| A_52_P487615 | Fam105a       | 12.22       | chr15      | 27586750  | 27586809  | family with sequence similarity 105, member A              |
| A_51_P325856 | Mcomp1        | 12.20       | chr8       | 3668713   | 3668772   | mast cell expressed membrane protein 1                     |
| A_52_P546363 | Gata3         | 12.19       | chr2       | 9778983   | 9779042   | GATA binding protein 3                                     |
| A_52_P24447  | Nkg7          | 12.16       | chr7       | 50693482  | 50693541  | natural killer cell group 7 sequence                       |
| A_51_P242930 | Lat2          | 12.05       | chr5       | 135076329 | 135076388 | linker for activation of T cells family, member 2          |
| A_51_P431823 | Arhgap45      | 11.88       | chr10      | 79493876  | 79493935  | Rho GTPase activating protein 45                           |
| A_51_P327121 | Was           | 11.73       | chrX       | 7658779   | 7658838   | Wiskott-Aldrich syndrome                                   |
| A_51_P136294 | Ms4a4b        | 11.73       | chr19      | 11537629  | 11537688  | membrane-spanning 4-domains, subfamily A, member 4B        |
| A_52_P16873  | Rasal3        | 11.46       | chr17      | 32528297  | 32529002  | RAS protein activator like 3                               |
| A_52_P72587  | Prkcg         | 11.37       | chr2       | 11222026  | 11222085  | protein kinase C, theta                                    |
| A_51_P327141 | Zap70         | 11.26       | chr1       | 36838210  | 36838269  | zeta-chain (TCR) associated protein kinase                 |
| A_51_P495242 | Lat           | 11.15       | chr7       | 133507719 | 133507778 | linker for activation of T cells                           |
| A_51_P487555 | Cd7           | 11.09       | chr11      | 120898068 | 120898127 | CD7 antigen                                                |
| A_51_P139108 | Cpxm1         | 11.06       | chr2       | 130216611 | 130216670 | carboxypeptidase X 1                                       |
| A_51_P511315 | Pstpip1       | 11.01       | chr9       | 55975648  | 55976435  | proline-serine-threonine phosphatase-interacting protein 1 |
| A_51_P275302 | Lcp1          | 10.96       | chr14      | 75623887  | 75623946  | lymphocyte cytosolic protein 1                             |
| A_52_P628615 | Fyb           | 10.82       | chr15      | 6601895   | 6602432   | FYN binding protein                                        |
| A_51_P383489 | Fignl1        | 10.78       | chr11      | 11700898  | 11700957  | figetin-like 1                                             |
| A_52_P422494 | Cd300lf       | 10.73       | chr11      | 114977533 | 114977592 | CD300 molecule like family member F                        |
| A_51_P464703 | Ccl8          | 10.55       | chr11      | 81930108  | 81930167  | chemokine (C-C motif) ligand 8                             |
| A_52_P424970 | Itgal         | 10.53       | chr7       | 134478358 | 134478417 | integrin alpha L                                           |

|              |               |       |       |           |           |                                                               |
|--------------|---------------|-------|-------|-----------|-----------|---------------------------------------------------------------|
| A_52_P264924 | Ctsw          | 10.43 | chr19 | 5465371   | 5465430   | cathepsin W                                                   |
| A_51_P267314 | Tbc1d10c      | 10.39 | chr19 | 4184616   | 4184675   | TBC1 domain family, member 10c                                |
| A_51_P151902 | Spon1         | 10.32 | chr7  | 121184084 | 121184143 | spondin 1, (f-spondin) extracellular matrix protein           |
| A_52_P507017 | H2-Ab1        | 10.27 | chr17 | 34263227  | 34269418  | Major Histocompatibility Complex, Class II, DQ Beta 1         |
| A_52_P552589 | Map4k1        | 10.19 | chr7  | 29788230  | 29788289  | mitogen-activated protein kinase kinase kinase 1              |
| A_52_P13448  | Pclaf         | 10.17 | chr9  | 65749677  | 65749736  | PCNA clamp associated factor                                  |
| A_51_P364600 | Fyb           | 10.14 | chr15 | 6610710   | 6613204   | FYN binding protein                                           |
| A_52_P612382 | Cdc25b        | 10.11 | chr2  | 131023911 | 131023970 | cell division cycle 25B                                       |
| A_51_P420400 | Lef1          | 10.04 | chr3  | 130907851 | 130926012 | lymphoid enhancer binding factor 1                            |
| A_51_P302576 | Spn           | 10.04 | chr7  | 134278174 | 134278233 | sialophorin                                                   |
| A_52_P515247 | Arhgdib       | 9.99  | chr6  | 136872241 | 136872300 | Rho, GDP dissociation inhibitor                               |
| A_52_P474775 | Tspan32       | 9.98  | chr7  | 150205004 | 150205063 | tetraspanin 32                                                |
| A_51_P121891 | Rac2          | 9.95  | chr15 | 78391452  | 78391511  | RAS-related C3 botulinum substrate 2                          |
| A_51_P313320 | Cd6           | 9.93  | chr19 | 10863891  | 10863950  | CD6 antigen                                                   |
| A_51_P208511 | Cnr2          | 9.92  | chr4  | 135475595 | 135475654 | cannabinoid receptor 2                                        |
| A_52_P237087 | Cd180         | 9.91  | chr13 | 103494202 | 103494261 | CD180 antigen                                                 |
| A_52_P137193 | Al662270      | 9.84  | chr11 | 83039355  | 83039414  | expressed sequence Al662270                                   |
| A_51_P219109 | Il12rb1       | 9.80  | chr8  | 73345189  | 73345248  | interleukin 12 receptor, beta 1                               |
| A_51_P447866 | Sash3         | 9.75  | chrX  | 45514492  | 45514551  | SAM and SH3 domain containing 3                               |
| A_51_P404815 | Apol6         | 9.63  | chr15 | 76887458  | 76887517  | apolipoprotein L 6                                            |
| A_51_P154780 | Vav1          | 9.55  | chr17 | 57451288  | 57454690  | vav 1 oncogene                                                |
| A_52_P368690 | Jaml          | 9.42  | chr9  | 44916279  | 44916338  | junction adhesion molecule like                               |
| A_51_P507509 | Gimap1        | 9.38  | chr6  | 48693409  | 48693468  | GTPase, IMAP family member 1                                  |
| A_51_P220976 | Ifng          | 9.31  | chr10 | 117882614 | 117882673 | interferon gamma                                              |
| A_52_P239834 | Ptprc         | 9.30  | chr1  | 139962691 | 139962750 | protein tyrosine phosphatase, receptor type, C                |
| A_52_P244711 | Tcf7          | 9.27  | chr11 | 52066831  | 52066890  | transcription factor 7, T cell specific                       |
| A_51_P167360 | Ptpn7         | 9.20  | chr1  | 137041106 | 137041165 | protein tyrosine phosphatase, non-receptor type 7             |
| A_51_P491742 | Uhrf1         | 9.20  | chr17 | 56462554  | 56462613  | ubiquitin-like, containing PHD and RING finger domains, 1     |
| A_52_P51429  | Dennd1c       | 9.18  | chr17 | 57205514  | 57205573  | DENN/MADD domain containing 1C                                |
| A_52_P634218 | C1s1          | 9.13  | chr6  | 124481467 | 124481526 | complement component 1, s subcomponent 1                      |
| A_51_P499918 | Hck           | 9.09  | chr2  | 152974812 | 152976739 | hemopoietic cell kinase                                       |
| A_51_P428708 | C4b           | 9.05  | chr17 | 34866361  | 34866420  | complement component 4B (Chido blood group)                   |
| A_51_P303424 | Itgax         | 9.01  | chr7  | 135294052 | 135294111 | integrin alpha X                                              |
| A_51_P240453 | Nusap1        | 9.01  | chr2  | 119475072 | 119475131 | nucleolar and spindle associated protein 1                    |
| A_51_P136289 | Ms4a4b        | 8.97  | chr19 | 11529252  | 11532335  | membrane-spanning 4-domains, subfamily A, member 4B           |
| A_52_P586141 | Adcy7         | 8.97  | chr8  | 90853657  | 90853716  | adenylate cyclase 7                                           |
| A_52_P668543 | Lair1         | 8.95  | chr7  | 3959947   | 3960006   | leukocyte-associated Ig-like receptor 1                       |
| A_52_P279425 | Cd96          | 8.91  | chr16 | 46038560  | 46038619  | CD96 antigen                                                  |
| A_52_P343455 | Tnfrsf13b     | 8.90  | chr11 | 60962499  | 60962558  | tumor necrosis factor receptor superfamily, member 13b        |
| A_52_P280044 | Adam19        | 8.85  | chr11 | 45960412  | 45960471  | a disintegrin and metallopeptidase domain 19 (meltrin beta)   |
| A_52_P260659 | Kcnj10        | 8.82  | chr1  | 174303962 | 174304021 | potassium inwardly-rectifying channel, subfamily J, member 10 |
| A_51_P291227 | Arhgap30      | 8.75  | chr1  | 173339923 | 173339982 | Rho GTPase activating protein 30                              |
| A_51_P327127 | Was           | 8.72  | chrX  | 7658842   | 7658901   | Wiskott-Aldrich syndrome                                      |
| A_51_P331831 | Hvcn1         | 8.66  | chr5  | 122691981 | 122692040 | hydrogen voltage-gated channel 1                              |
| A_51_P136288 | Ms4a4b        | 8.66  | chr19 | 11532321  | 11533680  | membrane-spanning 4-domains, subfamily A, member 4B           |
| A_51_P183912 | Il27ra        | 8.63  | chr8  | 86554885  | 86554944  | interleukin 27 receptor, alpha                                |
| A_52_P513177 | Sla           | 8.61  | chr15 | 66613170  | 66613229  | src-like adaptor, transcript variant 1                        |
| A_51_P146149 | Napsa         | 8.58  | chr7  | 51840710  | 51841119  | napsin A aspartic peptidase                                   |
| A_52_P438280 | Bcl2          | 8.54  | chr1  | 108607310 | 108607369 | B cell leukemia/lymphoma 2                                    |
| A_51_P145883 | Btk           | 8.54  | chrX  | 131077061 | 131077120 | Bruton agammaglobulinemia tyrosine kinase                     |
| A_52_P173726 | Vav1          | 8.53  | chr17 | 57464127  | 57464186  | vav 1 oncogene                                                |
| A_52_P56751  | Lcp1          | 8.51  | chr14 | 75630210  | 75630269  | lymphocyte cytosolic protein 1                                |
| A_51_P367100 | Itih3         | 8.50  | chr14 | 31721841  | 31721900  | inter-alpha trypsin inhibitor, heavy chain 3                  |
| A_51_P320593 | Def6          | 8.46  | chr17 | 28365393  | 28365452  | differentially expressed in FDCP 6                            |
| A_52_P165657 | Dnase1l3      | 8.43  | chr14 | 8799409   | 8799468   | deoxyribonuclease 1-like 3                                    |
| A_52_P146877 | H2-DMb1       | 8.38  | chr17 | 34294265  | 34294324  | histocompatibility 2, class II, locus Mb1                     |
| A_51_P147274 | Clec4a3       | 8.30  | chr6  | 122919637 | 122919696 | C-type lectin domain family 4, member a3                      |
| A_51_P368171 | LOC108167440  | 8.30  | chr7  | 82914026  | 82914083  | PREDICTED: uncharacterized LOC108167440                       |
| A_51_P377452 | Ncf4          | 8.29  | chr15 | 78092903  | 78092962  | neutrophil cytosolic factor 4                                 |
| A_51_P243808 | Traf3ip3      | 8.29  | chr1  | 195001838 | 195001897 | TRAF3 interacting protein 3                                   |
| A_52_P168575 | Fam169b       | 8.29  | chr7  | 75507905  | 75507964  | family with sequence similarity 169, member B                 |
| A_52_P324042 | Serpina1b     | 8.27  | chr12 | 104986869 | 104970188 | Serpin Family A Member 1                                      |
| A_51_P253808 | Mki67         | 8.25  | chr7  | 142886012 | 142886071 | antigen identified by monoclonal antibody Ki 67               |
| A_52_P255782 | Slco2b1       | 8.25  | chr7  | 106807008 | 106807067 | solute carrier organic anion transporter family, member 2b1   |
| A_52_P166833 | Snx5          | 8.24  | chr2  | 144093345 | 144093404 | Sorting Nexin 5                                               |
| A_52_P202770 | Ccnb1         | 8.15  | chr13 | 101549634 | 101549693 | cyclin B1                                                     |
| A_51_P509651 | Cep55         | 8.12  | chr19 | 38148576  | 38148635  | centrosomal protein 55                                        |
| A_52_P314705 | Uhrf1         | 8.05  | chr17 | 56462657  | 56462716  | ubiquitin-like, containing PHD and RING finger domains, 1     |
| A_51_P105078 | S100a4        | 8.04  | chr3  | 90409842  | 90409902  | S100 calcium binding protein A4                               |
| A_51_P302358 | Ltb           | 8.00  | chr17 | 35333097  | 35333156  | lymphotoxin B                                                 |
| A_51_P102471 | Pglyrp2       | 7.99  | chr17 | 32550316  | 32550375  | peptidoglycan recognition protein 2                           |
| A_52_P683598 | H2-Ab1        | 7.89  | chr17 | 34406059  | 34406118  | histocompatibility 2, class II antigen A, beta 1              |
| A_52_P507498 | Plxnc1        | 7.87  | chr10 | 94253879  | 94253938  | plexin C1                                                     |
| A_52_P618417 | Bin2          | 7.87  | chr15 | 100471513 | 100471569 | bridging integrator 2                                         |
| A_52_P212686 | Lrrk1         | 7.85  | chr7  | 73430135  | 73430194  | leucine-rich repeat kinase 1                                  |
| A_51_P433615 | Klhl6         | 7.82  | chr16 | 19948180  | 19948239  | kelch-like 6                                                  |
| A_52_P651425 | Ncf1          | 7.80  | chr5  | 134696729 | 134696788 | neutrophil cytosolic factor 1                                 |
| A_51_P330213 | Asf1b         | 7.78  | chr8  | 86493842  | 86493901  | anti-silencing function 1B histone chaperone                  |
| A_52_P531651 | Parvg         | 7.77  | chr15 | 84173148  | 84173207  | parvin, gamma                                                 |
| A_52_P70261  | Stat1         | 7.76  | chr1  | 52210706  | 52210765  | signal transducer and activator of transcription 1            |
| A_51_P123242 | Arhgap45      | 7.76  | chr10 | 79480731  | 79480790  | Rho GTPase activating protein 45                              |
| A_52_P614303 | Kif21b        | 7.73  | chr1  | 138073733 | 138073792 | kinesin family member 21B                                     |
| A_52_P526740 | A430093F15Rik | 7.72  | chr19 | 10860290  | 10860349  | RIKEN cDNA A430093F15 gene                                    |
| A_51_P345367 | Psmb8         | 7.71  | chr17 | 34337771  | 34337830  | proteasome (prosome, macropain) subunit, beta type 8          |

|              |           |      |       |           |           |                                                                          |
|--------------|-----------|------|-------|-----------|-----------|--------------------------------------------------------------------------|
| A_52_P25026  | Klra17    | 7.71 | chr6  | 129818820 | 129822239 | killer cell lectin-like receptor, subfamily A, member 17                 |
| A_51_P372702 | Il16      | 7.70 | chr7  | 90791654  | 90791713  | interleukin 16                                                           |
| A_51_P126067 | Cd2       | 7.69 | chr3  | 101083802 | 101086981 | CD2 antigen                                                              |
| A_51_P427663 | Cnn2      | 7.68 | chr10 | 79457785  | 79457844  | calponin 2                                                               |
| A_51_P461665 | Cxcl9     | 7.67 | chr5  | 92752191  | 92752250  | chemokine (C-X-C motif) ligand 9                                         |
| A_52_P322141 | Ccdc88b   | 7.66 | chr19 | 6919119   | 6919178   | coiled-coil domain containing 88B                                        |
| A_51_P376127 | Aire      | 7.64 | chr10 | 77492823  | 77492882  | autoimmune regulator                                                     |
| A_51_P131358 | Selp1g    | 7.63 | chr5  | 114267807 | 114267834 | selectin, platelet (p-selectin) ligand                                   |
| A_51_P189451 | Klrl1     | 7.62 | chr6  | 129562482 | 129562771 | Killer Cell Lectin Like Receptor K1                                      |
| A_51_P352076 | Itgae     | 7.61 | chr11 | 72959105  | 72960563  | integrin alpha E, epithelial-associated                                  |
| A_52_P274960 | Arhgap30  | 7.59 | chr1  | 173339901 | 173339960 | Rho GTPase activating protein 30                                         |
| A_52_P73475  | Fam78a    | 7.58 | chr2  | 31922511  | 31922570  | family with sequence similarity 78, member A                             |
| A_51_P483324 | Ptpn22    | 7.56 | chr3  | 103716092 | 103716151 | protein tyrosine phosphatase, non-receptor type 22 (lymphoid)            |
| A_52_P282500 | Kif21b    | 7.55 | chr1  | 138074490 | 138074549 | kinesin family member 21B                                                |
| A_51_P372456 | Wdr86     | 7.53 | chr5  | 24218125  | 24218184  | WD repeat domain 86                                                      |
| A_52_P236448 | Ngfr      | 7.51 | chr11 | 95430211  | 95430270  | nerve growth factor receptor (TNFR superfamily, member 16)               |
| A_51_P437426 | Nrros     | 7.45 | chr16 | 32143014  | 32143073  | negative regulator of reactive oxygen species                            |
| A_51_P358344 | Col17a1   | 7.43 | chr19 | 47720894  | 47720953  | collagen, type XVII, alpha 1                                             |
| A_51_P333253 | Myo1g     | 7.42 | chr11 | 6406614   | 6406673   | myosin IG                                                                |
| A_51_P104608 | Rnase6    | 7.41 | chr14 | 51750572  | 51750631  | ribonuclease, RNase A family, 6                                          |
| A_51_P441622 | Adcy7     | 7.40 | chr8  | 90852801  | 90852860  | adenylate cyclase 7                                                      |
| A_51_P183581 | Pou2af1   | 7.34 | chr9  | 51048108  | 51048167  | POU domain, class 2, associating factor 1                                |
| A_51_P257934 | Tnfsf13b  | 7.29 | chr8  | 10035561  | 10035620  | tumor necrosis factor (ligand) superfamily, member 13b                   |
| A_51_P308844 | Nrn1      | 7.28 | chr13 | 36817941  | 36818000  | neurotrophin 1                                                           |
| A_52_P205001 | Gimap4    | 7.25 | chr6  | 48640866  | 48640925  | GTPase, IMAP family member 4                                             |
| A_52_P663704 | Podnl1    | 7.25 | chr8  | 86656176  | 86656235  | podocan-like 1                                                           |
| A_51_P312336 | Slc14a1   | 7.22 | chr18 | 78298526  | 78298585  | solute carrier family 14 (urea transporter), member 1                    |
| A_52_P14600  | Cd72      | 7.21 | chr4  | 43463070  | 43465214  | CD72 antigen                                                             |
| A_52_P75298  | Cd247     | 7.20 | chr1  | 167791855 | 167791914 | CD247 antigen                                                            |
| A_51_P494597 | Themis2   | 7.20 | chr4  | 132337807 | 132337866 | thymocyte selection associated family member 2                           |
| A_51_P125135 | Cdca5     | 7.19 | chr19 | 6091709   | 6091768   | cell division cycle associated 5                                         |
| A_52_P677117 | Ptpcr     | 7.17 | chr1  | 139960089 | 139960148 | protein tyrosine phosphatase, receptor type, C                           |
| A_51_P208240 | Tnfsf14   | 7.16 | chr17 | 57329192  | 57329251  | tumor necrosis factor (ligand) superfamily, member 14                    |
| A_51_P362877 | Il21r     | 7.16 | chr7  | 132776151 | 132776210 | interleukin 21 receptor                                                  |
| A_52_P26991  | Dcl1      | 7.16 | chr3  | 55271688  | 55271747  | doublecortin-like kinase 1                                               |
| A_52_P507802 | Lpar1     | 7.15 | chr4  | 58448724  | 58448783  | lysophosphatidic acid receptor 1                                         |
| A_51_P517388 | Plbd1     | 7.13 | chr6  | 136560647 | 136560706 | phospholipase B domain containing 1                                      |
| A_52_P291    | Adcy7     | 7.12 | chr8  | 90830803  | 90830862  | adenylate cyclase 7                                                      |
| A_51_P252157 | Top2a     | 7.12 | chr11 | 98857244  | 98858058  | topoisomerase (DNA) II alpha                                             |
| A_51_P15242  | H2-Ab1    | 7.11 | chr17 | 34401723  | 34401782  | histocompatibility 2, class II antigen A, beta 1                         |
| A_51_P300281 | Coro1a    | 7.10 | chr7  | 133844338 | 133844397 | coronin, actin binding protein 1A                                        |
| A_51_P369550 | Cd84      | 7.09 | chr1  | 173818757 | 173818817 | CD84 antigen                                                             |
| A_51_P292736 | Cd72      | 7.04 | chr4  | 43463042  | 43465186  | CD72 antigen                                                             |
| A_51_P105887 | Lax1      | 7.02 | chr1  | 135576130 | 135576189 | lymphocyte transmembrane adaptor 1                                       |
| A_52_P116024 | Crif3     | 7.02 | chr11 | 79860687  | 79860746  | cytokine receptor-like factor 3                                          |
| A_51_P119760 | H2-Aa     | 7.00 | chr17 | 34420627  | 34420686  | histocompatibility 2, class II antigen A, alpha                          |
| A_51_P212754 | Tgfb1     | 6.99 | chr13 | 56740460  | 56740519  | transforming growth factor, beta induced                                 |
| A_51_P501364 | Tbx21     | 6.98 | chr11 | 96959417  | 96959476  | T-box 21                                                                 |
| A_52_P457376 | Fyb       | 6.97 | chr15 | 6615198   | 6615257   | FYN binding protein                                                      |
| A_51_P286496 | Il2rb     | 6.96 | chr15 | 78311109  | 78311168  | interleukin 2 receptor, beta chain                                       |
| A_51_P366672 | Slc36a2   | 6.94 | chr11 | 54972134  | 54972193  | solute carrier family 36 (proton/amino acid symporter), member 2         |
| A_51_P339822 | Arhgap4   | 6.93 | chrX  | 71139944  | 71140003  | Rho GTPase activating protein 4                                          |
| A_52_P66505  | Gm4827    | 6.93 | chr16 | 50019827  | 50019886  | predicted gene 4827                                                      |
| A_51_P450191 | Art4      | 6.92 | chr6  | 136797251 | 136797310 | ADP-ribosyltransferase 4                                                 |
| A_52_P488572 | Elmo1     | 6.92 | chr13 | 20382247  | 20382306  | engulfment and cell motility 1                                           |
| A_51_P262208 | Itgb2     | 6.89 | chr10 | 77027978  | 77028037  | integrin beta 2                                                          |
| A_51_P300277 | Coro1a    | 6.88 | chr7  | 133843425 | 133843484 | coronin, actin binding protein 1A                                        |
| A_52_P99848  | Pik3cd    | 6.88 | chr4  | 149023282 | 149023341 | phosphatidylinositol 3-kinase catalytic delta polypeptide                |
| A_52_P27871  | Fbnp1     | 6.88 | chr2  | 30882538  | 30882597  | formin binding protein 1                                                 |
| A_51_P390804 | Wisp2     | 6.88 | chr2  | 163658717 | 163658776 | WNT1 inducible signaling pathway protein 2                               |
| A_52_P565353 | Cxcr4     | 6.86 | chr1  | 130485659 | 130485718 | chemokine (C-X-C motif) receptor 4                                       |
| A_51_P215237 | H2-Ab1    | 6.86 | chr17 | 34404388  | 34404447  | histocompatibility 2, class II antigen A, beta 1                         |
| A_51_P465449 | Mybpc3    | 6.85 | chr2  | 90976577  | 90976636  | myosin binding protein C, cardiac                                        |
| A_52_P925277 | Bcl11b    | 6.84 | chr12 | 109148932 | 109148991 | B cell leukemia/lymphoma 11B                                             |
| A_52_P211956 | Ms4a4d    | 6.84 | chr19 | 11629387  | 11630711  | membrane-spanning 4-domains, subfamily A, member 4D                      |
| A_51_P114917 | Dock2     | 6.83 | chr11 | 34129586  | 34130706  | dedicator of cyto-kinesis 2                                              |
| A_52_P591153 | Pld4      | 6.80 | chr12 | 114006018 | 114006077 | phospholipase D family, member 4                                         |
| A_52_P216672 | Klk8      | 6.80 | chr7  | 51057455  | 51057514  | kallikrein related-peptidase 8                                           |
| A_51_P487918 | Rin1      | 6.79 | chr7  | 29583737  | 29583796  | Ras and Rab interactor-like                                              |
| A_52_P508962 | Kcnab2    | 6.79 | chr4  | 151765339 | 151765398 | potassium voltage-gated channel, shaker-related subfamily, beta member 2 |
| A_52_P70255  | Stat1     | 6.75 | chr1  | 52211841  | 52211900  | signal transducer and activator of transcription 1                       |
| A_51_P466378 | Itgal     | 6.73 | chr7  | 134477160 | 134477219 | integrin alpha L                                                         |
| A_51_P214209 | Spc24     | 6.73 | chr9  | 21560478  | 21560537  | SPC24, NDC80 kinetochore complex component, homolog (S. cerevisiae)      |
| A_51_P473734 | H2-DMA    | 6.72 | chr17 | 34274300  | 34274863  | histocompatibility 2, class II, locus DMA                                |
| A_51_P171382 | Cd163l1   | 6.68 | chr7  | 147416949 | 147417008 | CD163 molecule-like 1                                                    |
| A_51_P439326 | Arhgap9   | 6.66 | chr10 | 126765576 | 126765988 | Rho GTPase activating protein 9                                          |
| A_52_P397204 | Csk       | 6.64 | chr9  | 57474734  | 57474793  | c-src tyrosine kinase                                                    |
| A_52_P598495 | Serpina1c | 6.61 | chr12 | 105137263 | 105137322 | serine (or cysteine) peptidase inhibitor, clade A, member 1C             |
| A_51_P106322 | Gpsm3     | 6.61 | chr17 | 34728410  | 34728469  | G-protein signalling modulator 3 (AGS3-like, C. elegans)                 |
| A_52_P496956 | Acsbg1    | 6.60 | chr9  | 54453010  | 54453069  | acyl-CoA synthetase bubblegum family member 1                            |
| A_52_P544421 | Gbp8      | 6.56 | chr5  | 105446707 | 105446766 | guanylate-binding protein 8                                              |
| A_52_P67079  | Def6      | 6.54 | chr17 | 28365142  | 28365201  | differentially expressed in FDCP 6                                       |
| A_51_P281033 | Coro2a    | 6.54 | chr4  | 46550476  | 46550535  | coronin, actin binding protein 2A                                        |
| A_51_P246119 | Cenpf     | 6.51 | chr1  | 191465934 | 191465993 | centromere protein F                                                     |

|              |               |      |       |           |           |                                                                            |
|--------------|---------------|------|-------|-----------|-----------|----------------------------------------------------------------------------|
| A_51_P114634 | Amz1          | 6.50 | chr5  | 141229165 | 141229224 | archaelysin family metalloproteinase 1                                     |
| A_51_P402359 | Btla          | 6.49 | chr16 | 45252118  | 45252177  | B and T lymphocyte associated                                              |
| A_52_P99810  | Cx3cr1        | 6.48 | chr9  | 119959018 | 119959077 | chemokine (C-X3-C motif) receptor 1                                        |
| A_51_P224013 | Tk1           | 6.46 | chr11 | 117677105 | 117677164 | thymidine kinase 1                                                         |
| A_52_P472888 | Malt1         | 6.44 | chr18 | 65613877  | 65613936  | MALT1 paracaspase                                                          |
| A_52_P375312 | Jaml          | 6.44 | chr9  | 44915486  | 44915545  | junction adhesion molecule like                                            |
| A_51_P445726 | Pirb          | 6.44 | chr7  | 3664148   | 3664207   | paired Ig-like receptor B                                                  |
| A_51_P236303 | Serpina1d     | 6.44 | chr12 | 105001833 | 105001892 | serine (or cysteine) peptidase inhibitor, clade A, member 1D               |
| A_52_P268911 | Ikzf2         | 6.42 | chr1  | 69728793  | 69728852  | IKAROS family zinc finger 2                                                |
| A_52_P664899 | Elavl2        | 6.41 | chr4  | 90918411  | 90918470  | ELAV (embryonic lethal, abnormal vision, Drosophila)-like 2 (Hu antigen B) |
| A_51_P499195 | Nkg7          | 6.38 | chr7  | 50693148  | 50693207  | natural killer cell group 7 sequence                                       |
| A_51_P276267 | Spib          | 6.37 | chr7  | 51781646  | 51781705  | Spi-B transcription factor (Spi-1/PU.1 related)                            |
| A_52_P63044  | Lsp1          | 6.37 | chr7  | 149675860 | 149675919 | lymphocyte specific 1                                                      |
| A_52_P328350 | Ryr3          | 6.35 | chr2  | 112471931 | 112471990 | ryanodine receptor 3                                                       |
| A_51_P326994 | Calhm2        | 6.34 | chr19 | 47206942  | 47207001  | calcium homeostasis modulator 2                                            |
| A_51_P492830 | Cenph         | 6.33 | chr13 | 101534182 | 101536833 | centromere protein H                                                       |
| A_52_P658437 | Espl1         | 6.32 | chr15 | 102153644 | 102153882 | extra spindle pole bodies 1, separase                                      |
| A_51_P435617 | Best3         | 6.30 | chr10 | 116432899 | 116432958 | Bestrophin 3                                                               |
| A_51_P445728 | Pirb          | 6.30 | chr7  | 3664158   | 3664217   | paired Ig-like receptor B                                                  |
| A_52_P237948 | Tm6sf1        | 6.28 | chr7  | 89028488  | 89028547  | transmembrane 6 superfamily member 1                                       |
| A_52_P49983  | Pla2g5        | 6.25 | chr4  | 138355365 | 138355424 | phospholipase A2, group V                                                  |
| A_51_P369200 | Tpx2          | 6.23 | chr2  | 152719476 | 152719535 | TPX2, microtubule-associated                                               |
| A_51_P345366 | Psmb8         | 6.22 | chr17 | 34337828  | 34338152  | proteasome (prosome, macropain) subunit, beta type 8                       |
| A_52_P338066 | Ubd           | 6.20 | chr17 | 37332688  | 37332747  | ubiquitin D                                                                |
| A_51_P484371 | Tnfsf8        | 6.16 | chr4  | 63494489  | 63494548  | tumor necrosis factor (ligand) superfamily, member 8                       |
| A_52_P364776 | Mcm3          | 6.15 | chr1  | 20795363  | 20795879  | minichromosome maintenance complex component 3                             |
| A_51_P375543 | Myb           | 6.15 | chr10 | 20844963  | 20845022  | myeloblastosis oncogene                                                    |
| A_51_P176156 | Sirpb1b       | 6.13 | chr3  | 15542342  | 15542401  | signal-regulatory protein beta 1B                                          |
| A_52_P440885 | 9630023C09Rik | 6.13 | chr11 | 44553363  | 44553422  | BB183876 RIKEN full-length enriched, adult male spinal cord cDNA           |
| A_52_P105179 | Stum          | 6.12 | chr1  | 182362524 | 182362583 | mechanosensory transduction mediator                                       |
| A_51_P489289 | Rhoh          | 6.11 | chr5  | 66284449  | 66284508  | ras homolog family member H                                                |
| A_51_P469433 | Tnfrsf4       | 6.11 | chr4  | 155390635 | 155390694 | tumor necrosis factor receptor superfamily, member 4                       |
| A_52_P664404 | Zfp286        | 6.11 | chr11 | 62593119  | 62593178  | zinc finger protein 286                                                    |
| A_52_P107538 | Gmfg          | 6.07 | chr7  | 29226718  | 29228278  | glia maturation factor, gamma                                              |
| A_51_P151126 | Cd52          | 6.07 | chr4  | 133649505 | 133649564 | CD52 antigen                                                               |
| A_52_P14686  | Dtl           | 6.05 | chr1  | 193361353 | 193361412 | denticuleless E3 ubiquitin protein ligase                                  |
| A_51_P187262 | Mmp25         | 6.04 | chr17 | 23767090  | 23767149  | matrix metalloproteinase 25                                                |
| A_52_P277104 | Bank1         | 6.04 | chr3  | 135716867 | 135716926 | B cell scaffold protein with ankyrin repeats 1                             |
| A_51_P518528 | Dpy19l1       | 6.03 | chr9  | 24216536  | 24216595  | dpy-19-like 1 (C. elegans)                                                 |
| A_51_P303749 | Depdc1b       | 6.03 | chr13 | 109179573 | 109179632 | DEP domain containing 1B                                                   |
| A_52_P496503 | Stat1         | 6.02 | chr1  | 52216782  | 52216841  | signal transducer and activator of transcription 1                         |
| A_51_P489736 | Nemp2         | 5.99 | chr1  | 52708426  | 52708485  | nuclear envelope integral membrane protein 2                               |
| A_51_P208793 | C1s1          | 5.98 | chr6  | 124480828 | 124480887 | complement component 1, s subcomponent 1                                   |
| A_51_P450033 | Cdk1          | 5.96 | chr10 | 68805423  | 68807832  | cyclin-dependent kinase 1                                                  |
| A_52_P150547 | Cd8a          | 5.95 | chr6  | 71323885  | 71323944  | CD8 antigen, alpha chain                                                   |
| A_51_P155142 | Cdca8         | 5.94 | chr4  | 124595809 | 124595868 | cell division cycle associated 8                                           |
| A_51_P401668 | Laptn5        | 5.94 | chr4  | 130490785 | 130490844 | lysosomal-associated protein transmembrane 5                               |
| A_51_P230942 | Runx2         | 5.93 | chr17 | 44741014  | 44741073  | runx related transcription factor 2                                        |
| A_52_P621940 | Epb41l2       | 5.89 | chr10 | 25225994  | 25226053  | erythrocyte membrane protein band 4.1 like 2                               |
| A_51_P461877 | Thbs2         | 5.89 | chr17 | 14804526  | 14805789  | thrombospondin 2                                                           |
| A_51_P100852 | Fam26f        | 5.87 | chr10 | 33846211  | 33846270  | family with sequence similarity 26, member F                               |
| A_51_P294555 | Ifitm6        | 5.87 | chr7  | 148201714 | 148201773 | interferon induced transmembrane protein 6                                 |
| A_51_P351970 | Hells         | 5.86 | chr19 | 39039914  | 39039973  | helicase, lymphoid specific                                                |
| A_51_P352875 | Lcp2          | 5.86 | chr11 | 33990902  | 33990961  | lymphocyte cytosolic protein 2                                             |
| A_51_P471659 | Alox12e       | 5.85 | chr11 | 70129157  | 70129216  | arachidonate lipoxygenase, epidermal                                       |
| A_51_P108108 | Lrrc25        | 5.85 | chr8  | 73144658  | 73144717  | leucine rich repeat containing 25                                          |
| A_52_P482063 | Tra2a         | 5.81 | chr6  | 49210730  | 49210789  | transformer 2 alpha homolog                                                |
| A_52_P614777 | Sucnr1        | 5.81 | chr3  | 59891281  | 59891340  | succinate receptor 1                                                       |
| A_51_P109508 | Havcr2        | 5.79 | chr11 | 46294650  | 46294709  | hepatitis A virus cellular receptor 2                                      |
| A_51_P505617 | Il18r1        | 5.78 | chr1  | 40557541  | 40557600  | interleukin 18 receptor 1                                                  |
| A_51_P497741 | Wdr95         | 5.78 | chr5  | 150414410 | 150414468 | WD40 repeat domain 95                                                      |
| A_52_P591431 | Tra2a         | 5.78 | chr6  | 49196959  | 49199039  | transformer 2 alpha homolog (Drosophila)                                   |
| A_52_P184548 | Ctla4         | 5.78 | chr1  | 60971508  | 60971567  | cytotoxic T-lymphocyte-associated protein 4                                |
| A_51_P328725 | Sik1          | 5.75 | chr17 | 31981508  | 31981567  | salt inducible kinase 1                                                    |
| A_51_P196973 | Chaf1a        | 5.74 | chr17 | 56206969  | 56207028  | chromatin assembly factor 1, subunit A                                     |
| A_51_P427516 | Thsd1         | 5.72 | chr8  | 23370246  | 23370305  | thrombospondin, type I, domain 1                                           |
| A_51_P376050 | Epsit1        | 5.72 | chr14 | 78401959  | 78402018  | epithelial stromal interaction 1 (breast)                                  |
| A_51_P293938 | Rasl11b       | 5.71 | chr5  | 74595213  | 74595272  | RAS-like, family 11, member B                                              |
| A_52_P379531 | Timeless      | 5.71 | chr10 | 127681744 | 127681803 | timeless circadian clock 1                                                 |
| A_51_P335146 | H60a          | 5.69 | chr10 |           |           | histocompatibility 60a                                                     |
| A_51_P171772 | Bcl11b        | 5.67 | chr12 | 109153847 | 109153906 | B cell leukemia/lymphoma 11B                                               |
| A_51_P297679 | Hcls1         | 5.66 | chr16 | 36963165  | 36963224  | hematopoietic cell specific Lyn substrate 1                                |
| A_51_P121031 | March1        | 5.64 | chr8  | 68994134  | 68994193  | membrane-associated ring finger (C3HC4) 1                                  |
| A_51_P375862 | Srp3k         | 5.64 | chrX  | 71024011  | 71024070  | serine/arginine-rich protein specific kinase 3                             |
| A_52_P16973  | D930017J03Rik | 5.64 | chr14 | 52704744  | 52704804  | RIKEN cDNA D930017J03 gene                                                 |
| A_51_P284608 | Cd74          | 5.60 | chr18 | 60972075  | 60972132  | CD74 antigen                                                               |
| A_51_P187898 | H60a          | 5.59 | chr10 | 22026996  | 22027055  | histocompatibility 60a (H60a)                                              |
| A_51_P142604 | Nfam1         | 5.59 | chr15 | 82828622  | 82828681  | Nfat activating molecule with ITAM motif 1                                 |
| A_51_P208525 | Cr2           | 5.58 | chr1  | 196967371 | 196967430 | complement receptor 2                                                      |
| A_51_P400543 | Aif1          | 5.55 | chr17 | 35307959  | 35308018  | allograft inflammatory factor 1                                            |
| A_51_P393226 | H2-Eb1        | 5.55 | chr17 | 34452050  | 34452511  | histocompatibility 2, class II antigen E beta                              |
| A_51_P362029 | Cd48          | 5.54 | chr1  | 173635107 | 173635165 | CD48 antigen                                                               |
| A_51_P420731 | Thy1          | 5.54 | chr9  | 43854991  | 43855436  | thymus cell antigen 1, theta                                               |
| A_51_P393310 | Sid1          | 5.53 | chr16 | 44240873  | 44240932  | SID1 transmembrane family, member 1                                        |

|               |           |      |       |           |           |                                                                                 |
|---------------|-----------|------|-------|-----------|-----------|---------------------------------------------------------------------------------|
| A_51_P163953  | Nsg2      | 5.53 | chr11 | 31959102  | 31959161  | neuron specific gene family member 2                                            |
| A_52_P374545  | Gimap3    | 5.53 | chr6  | 48715034  | 48715093  | GTPase, IMAP family member 3                                                    |
| A_51_P448762  | Txk       | 5.52 | chr5  | 73087590  | 73087644  | TXK tyrosine kinase                                                             |
| A_52_P97572   | Aplnr     | 5.51 | chr2  | 84979638  | 84979697  | apelin receptor                                                                 |
| A_51_P280785  | Plekha2   | 5.48 | chr8  | 26153117  | 26153176  | pleckstrin homology domain-containing, family A, member 2                       |
| A_51_P302651  | Topbp1    | 5.44 | chr9  | 103252324 | 103252383 | topoisomerase (DNA) II binding protein 1                                        |
| A_51_P204402  | Shcbp1    | 5.43 | chr8  | 4736001   | 4736060   | Shc SH2-domain binding protein 1                                                |
| A_52_P548921  | Lrrk1     | 5.43 | chr7  | 73486587  | 73486646  | leucine-rich repeat kinase 1                                                    |
| A_52_P479249  | Thy1      | 5.42 | chr9  | 43856600  | 43856659  | thymus cell antigen 1, theta                                                    |
| A_51_P294505  | Ms4a4d    | 5.42 | chr19 | 11627340  | 11629316  | membrane-spanning 4-domains, subfamily A, member 4D                             |
| A_52_P38639   | Fermt3    | 5.41 | chr19 | 7074257   | 7076292   | fermitin family member 3                                                        |
| A_52_P49071   | Id2       | 5.41 | chr12 | 25780080  | 25780139  | inhibitor of DNA binding 2                                                      |
| A_51_P402760  | Pla2g4a   | 5.41 | chr1  | 151677133 | 151677192 | phospholipase A2, group IVA (cytosolic, calcium-dependent)                      |
| A_52_P189358  | Rnf150    | 5.40 | chr8  | 85614827  | 85614886  | ring finger protein 150                                                         |
| A_51_P176811  | Tspan10   | 5.38 | chr11 | 120380204 | 120380263 | tetraspanin 10                                                                  |
| A_51_P409496  | Arhgap11a | 5.38 | chr2  | 113671649 | 113671686 | Rho GTPase activating protein 11A                                               |
| A_52_P148553  | Fignl1    | 5.37 | chr11 | 11700853  | 11700912  | fidgetin-like 1                                                                 |
| A_51_P259603  | Adcyap1r1 | 5.37 | chr6  | 55450829  | 55450888  | adenylate cyclase activating polypeptide 1 receptor 1                           |
| A_51_P267447  | Adam19    | 5.37 | chr11 | 45959545  | 45959604  | a disintegrin and metalloproteinase domain 19 (meltrin beta)                    |
| A_51_P108788  | Bpifb5    | 5.36 | chr2  | 154064627 | 154066530 | BPI fold containing family B, member 5                                          |
| A_51_P441843  | Fanci     | 5.35 | chr7  | 86594919  | 86594978  | Fanconi anemia, complementation group I                                         |
| A_51_P342906  | Sh3bp1    | 5.34 | chr15 | 78742420  | 78742479  | SH3-domain binding protein 1                                                    |
| A_51_P164014  | Cenpe     | 5.34 | chr3  | 134936387 | 134936446 | centromere protein E                                                            |
| A_51_P499838  | Bst1      | 5.34 | chr5  | 44233465  | 44233524  | bone marrow stromal cell antigen 1                                              |
| A_51_P371279  | Icos      | 5.34 | chr1  | 61055103  | 61055162  | inducible T cell co-stimulator                                                  |
| A_51_P218774  | Rgs10     | 5.33 | chr7  | 135517256 | 135517315 | regulator of G-protein signalling 10                                            |
| A_51_P497171  | Ly9       | 5.33 | chr1  | 173518744 | 173518790 | lymphocyte antigen 9                                                            |
| A_51_P399896  | Matk      | 5.31 | chr10 | 80725246  | 80725393  | megakaryocyte-associated tyrosine kinase                                        |
| A_51_P481920  | Ccna2     | 5.29 | chr3  | 36463978  | 36464037  | cyclin A2                                                                       |
| A_51_P456952  | Il2rg     | 5.27 | chrX  | 98461022  | 98461535  | interleukin 2 receptor, gamma chain                                             |
| A_51_P413866  | Cfb       | 5.26 | chr17 | 34993502  | 34993858  | complement factor B                                                             |
| A_52_P664405  | Zfp286    | 5.26 | chr11 | 62593124  | 62593183  | zinc finger protein 286                                                         |
| A_51_P230103  | Birc5     | 5.24 | chr11 | 117716959 | 117717018 | baculoviral IAP repeat-containing 5                                             |
| A_52_P362603  | Dscc1     | 5.22 | chr15 | 54915650  | 54915709  | DNA replication and sister chromatid cohesion 1                                 |
| A_52_P139650  | Ska1      | 5.21 | chr18 | 74356611  | 74356670  | spindle and kinetochore associated complex subunit 1                            |
| A_51_P167803  | Pde1b     | 5.18 | chr15 | 103360357 | 103360416 | phosphodiesterase 1B, Ca2+-calmodulin dependent                                 |
| A_51_P378298  | Fcmmr     | 5.17 | chr1  | 132777256 | 132777315 | Fc fragment of IgM receptor                                                     |
| A_51_P268234  | Il34      | 5.16 | chr8  | 113265835 | 113265894 | interleukin 34                                                                  |
| A_52_P27602   | Kif23     | 5.15 | chr9  | 61767733  | 61768853  | kinesin family member 23                                                        |
| A_51_P449329  | H2-Oa     | 5.15 | chr17 | 34231964  | 34232024  | histocompatibility 2, O region alpha locus                                      |
| A_51_P110301  | C3        | 5.12 | chr17 | 57343416  | 57343475  | complement component 3                                                          |
| A_51_P438657  | Ipcsf1    | 5.11 | chr10 | 3459901   | 3459960   | interaction protein for cytohesin exchange factors 1                            |
| A_52_P657800  | Cep152    | 5.11 | chr2  | 125389336 | 125389395 | centrosomal protein 152                                                         |
| A_51_P377171  | Tespa1    | 5.11 | chr10 | 129799311 | 129799370 | thymocyte expressed, positive selection associated 1                            |
| A_52_P637282  | Wipf1     | 5.10 | chr2  | 73267829  | 73267888  | WAS/WASL interacting protein family, member 1                                   |
| A_52_P1020860 | AW112010  | 5.10 | chr19 | 11122349  | 11122408  | expressed sequence AW112010                                                     |
| A_51_P503797  | Lair1     | 5.09 | chr7  | 3960758   | 3960817   | leukocyte-associated Ig-like receptor 1                                         |
| A_51_P305003  | Ntrk1     | 5.09 | chr3  | 87583999  | 87584058  | neurotrophic tyrosine kinase, receptor, type 1                                  |
| A_51_P448664  | Tbxas1    | 5.09 | chr6  | 39034356  | 39034415  | thromboxane A synthase 1, platelet                                              |
| A_51_P268193  | Slc7a10   | 5.09 | chr7  | 35985868  | 35985927  | solute carrier family 7 (cationic amino acid transporter, y+ system), member 10 |
| A_52_P193823  | Rpl9      | 5.07 | chr5  | 65780200  | 65780259  | ribosomal protein L9                                                            |
| A_51_P344606  | Prph      | 5.06 | chr15 | 98887297  | 98887356  | peripherin                                                                      |
| A_51_P422300  | Ms4a6b    | 5.06 | chr19 | 11604383  | 11604442  | membrane-spanning 4-domains, subfamily A, member 6B                             |
| A_52_P399934  | Dusp2     | 5.06 | chr2  | 127163930 | 127163989 | dual specificity phosphatase 2                                                  |
| A_51_P417257  | Ppp1r2    | 5.05 | chr16 | 31272025  | 31272084  | protein phosphatase 1, regulatory inhibitor subunit 2                           |
| A_51_P508341  | Reep1     | 5.04 | chr6  | 71760436  | 71760495  | receptor accessory protein 1                                                    |
| A_52_P354752  | Rnf144b   | 5.03 | chr13 | 47341642  | 47341701  | ring finger protein 144B                                                        |
| A_52_P460230  | Cd48      | 5.03 | chr1  | 173625933 | 173625992 | CD48 antigen                                                                    |
| A_51_P489268  | Ncapg     | 5.02 | chr5  | 46091297  | 46091355  | non-SMC condensin I complex, subunit G                                          |
| A_52_P10793   | Ptn       | 5.01 | chr6  | 36691386  | 36693332  | pleiotrophin                                                                    |

#### Downregulated ≥5-fold in 12 week old NOD vs. NOD.B10 islets

| Probe        | Gene   | Fold change | Chromosome | Start     | End       | Description                              |
|--------------|--------|-------------|------------|-----------|-----------|------------------------------------------|
| A_52_P578763 | Defa1  | -287.34     | chr8       |           |           | defensin, alpha 1                        |
| A_52_P514200 | Defa6  | -135.43     | chr8       | 22845161  | 22845779  | defensin, alpha, 6                       |
| A_52_P994399 | Defa4  | -62.93      | chr8       | 22675993  | 22676052  | defensin, alpha, 4                       |
| A_51_P229403 | Lypd8  | -50.61      | chr11      | 58203969  | 58204028  | LY6/PLAUR domain containing 8            |
| A_51_P354126 | Reg3g  | -43.06      | chr6       | 78416420  | 78416479  | regenerating islet-derived 3 gamma       |
| A_51_P467086 | Defa3  | -40.76      | chr8       | 22427232  | 22427291  | defensin, alpha, 3                       |
| A_51_P209122 | Agr2   | -39.98      | chr12      | 36730506  | 36730565  | anterior gradient 2                      |
| A_51_P475689 | Cd209b | -39.59      | chr8       | 3918527   | 3918586   | CD209b antigen                           |
| A_51_P456208 | Tff3   | -32.25      | chr17      | 31262279  | 31262338  | trefoil factor 3, intestinal             |
| A_51_P217218 | Il6    | -28.85      | chr5       | 30346362  | 30346421  | interleukin 6                            |
| A_52_P267717 | Cd209b | -25.44      | chr8       | 3921355   | 3921414   | CD209b antigen                           |
| A_52_P177054 | Il22   | -23.37      | chr10      | 117646736 | 117646795 | interleukin 22                           |
| A_51_P253207 | Slc51a | -22.13      | chr16      | 32475636  | 32475695  | solute carrier family 51, alpha subunit  |
| A_51_P374726 | Ptx3   | -22.03      | chr3       | 66029245  | 66029304  | pentraxin related gene                   |
| A_51_P308796 | Fos1   | -21.37      | chr19      | 5455496   | 5455555   | fos-like antigen 1                       |
| A_51_P313581 | Fabp2  | -21.10      | chr3       | 122602276 | 122602335 | fatty acid binding protein 2, intestinal |
| A_51_P422751 | Clca1  | -21.05      | chr3       | 144667558 | 144667617 | chloride channel accessory 1             |
| A_52_P669922 | Hamp   | -20.93      | chr7       | 31727490  | 31727549  | hepcidin antimicrobial peptide           |
| A_51_P440315 | Gys2   | -18.90      | chr6       | 142371206 | 142371265 | glycogen synthase 2                      |
| A_51_P143031 | Eps8l3 | -18.36      | chr3       | 107695731 | 107695790 | EPS8-like 3                              |
| A_51_P362176 | Fgg    | -18.05      | chr3       | 82818825  | 82818884  | fibrinogen gamma chain                   |

|              |               |        |       |           |           |                                                                             |
|--------------|---------------|--------|-------|-----------|-----------|-----------------------------------------------------------------------------|
| A_52_P295432 | Cxcl5         | -17.59 | chr5  | 91190205  | 91190264  | chemokine (C-X-C motif) ligand 5                                            |
| A_51_P421780 | Myo18b        | -17.52 | chr5  | 113117913 | 113117972 | myosin XVIIIb                                                               |
| A_52_P26161  | Ptx3          | -17.38 | chr3  | 66029200  | 66029259  | pentraxin related gene                                                      |
| A_51_P199168 | Cidea         | -13.15 | chr18 | 67527351  | 67527410  | cell death-inducing DNA fragmentation factor, alpha subunit-like effector A |
| A_51_P133562 | Serpina6      | -13.09 | chr12 | 104884880 | 104884939 | serine (or cysteine) peptidase inhibitor, clade A, member 6                 |
| A_51_P188704 | Unc13a        | -12.83 | chr8  | 74184257  | 74184316  | unc-13 homolog A (C. elegans)                                               |
| A_51_P231103 | Defb1         | -12.49 | chr8  | 22905030  | 22905089  | defensin beta 1                                                             |
| A_51_P487818 | Fabp1         | -12.39 | chr6  | 71154906  | 71154965  | fatty acid binding protein 1, liver                                         |
| A_51_P232628 | Il22          | -12.03 | chr10 | 117646653 | 117646712 | interleukin 22                                                              |
| A_52_P321140 | Defb1         | -11.83 | chr8  | 22905041  | 22905100  | defensin beta 1                                                             |
| A_51_P428483 | Fgb           | -11.72 | chr3  | 82846334  | 82846393  | fibrinogen beta chain                                                       |
| A_52_P138919 | Hdx           | -11.62 | chrX  | 108683845 | 108683904 | highly divergent homeobox                                                   |
| A_51_P140237 | Fhl2          | -11.09 | chr1  | 43179994  | 43180053  | four and a half LIM domains 2                                               |
| A_51_P411345 | Mogat2        | -10.97 | chr7  | 106367601 | 106367660 | monoacylglycerol O-acyltransferase 2                                        |
| A_52_P416756 | D17H6S56E-5   | -10.95 | chr17 | 35134653  | 35134712  | DNA segment, Chr 17, human D6S56E 5                                         |
| A_52_P592970 | AY761184      | -10.65 | chr8  | 22813113  | 22813172  | cDNA sequence AY761184                                                      |
| A_51_P452768 | Cyp4f14       | -10.61 | chr17 | 33042214  | 33042273  | cytochrome P450, family 4, subfamily f, polypeptide 14                      |
| A_51_P492456 | Has1          | -10.60 | chr17 | 17980413  | 17980472  | hyaluronan synthase1                                                        |
| A_51_P179480 | 4930539E08Rik | -10.22 | chr17 | 29033340  | 29033393  | RIKEN cDNA 4930539E08 gene                                                  |
| A_52_P675556 | Ghrl          | -10.21 | chr6  | 113666248 | 113667090 | ghrelin                                                                     |
| A_51_P317176 | Csf3          | -10.20 | chr11 | 98564614  | 98564673  | colony stimulating factor 3 (granulocyte)                                   |
| A_52_P178718 | AY761184      | -10.12 | chr8  | 22812996  | 22813001  | cDNA sequence AY761184                                                      |
| A_51_P211998 | Sgms2         | -10.10 | chr3  | 131025871 | 131025930 | sphingomyelin synthase 2                                                    |
| A_51_P479818 | Lonrf3        | -9.95  | chrX  | 33902253  | 33902312  | LON peptidase N-terminal domain and ring finger 3                           |
| A_52_P291071 | Fbxw18        | -9.90  | chr9  | 109579341 | 109579400 | F-box and WD-40 domain protein 18                                           |
| A_51_P356467 | Cldn4         | -9.82  | chr5  | 135421347 | 135421406 | claudin 4                                                                   |
| A_51_P299062 | Kel           | -9.76  | chr6  | 41636474  | 41636533  | Kell blood group                                                            |
| A_51_P490456 | Cidec         | -9.52  | chr6  | 113374693 | 113374752 | cell death-inducing DFFA-like effector c                                    |
| A_51_P436652 | Ccl7          | -9.16  | chr11 | 81860656  | 81860715  | chemokine (C-C motif) ligand 7                                              |
| A_52_P249336 | Defa20        | -9.15  | chr8  | 22619859  | 22619918  | defensin, alpha, 20                                                         |
| A_51_P134468 | D17H6S56E-5   | -9.14  | chr17 | 35134128  | 35134187  | DNA segment, Chr 17, human D6S56E 5                                         |
| A_51_P378210 | Guca2a        | -9.13  | chr4  | 119311857 | 119311916 | guanylate cyclase activator 2a (guanylin)                                   |
| A_51_P205106 | Mlf1          | -9.09  | chr3  | 67203684  | 67203743  | myeloid leukemia factor 1                                                   |
| A_51_P331570 | Trib3         | -9.08  | chr2  | 152163355 | 152163414 | tribbles pseudokinase 3                                                     |
| A_51_P362818 | Nlrp6         | -9.06  | chr7  | 148114024 | 148114083 | NLR family, pyrin domain containing 6                                       |
| A_52_P483105 | Lpin1         | -8.74  | chr12 | 16544209  | 16544268  | lipin 1                                                                     |
| A_52_P637988 | Slc1a1        | -8.50  | chr19 | 28987016  | 28987075  | solute carrier family 1, member 1                                           |
| A_51_P491075 | Cfap53        | -8.48  | chr18 | 74519376  | 74519435  | cilia and flagella associated protein 53                                    |
| A_51_P386648 | Glod5         | -8.39  | chrX  | 7581343   | 7581402   | glyoxalase domain containing 5                                              |
| A_52_P483104 | Lpin1         | -8.24  | chr12 | 16544189  | 16544248  | lipin 1                                                                     |
| A_51_P169671 | Reg3b         | -8.18  | chr6  | 78323323  | 78323382  | regenerating islet-derived 3 beta                                           |
| A_51_P431329 | Car3          | -8.11  | chr3  | 14871781  | 14871840  | carbonic anhydrase 3                                                        |
| A_51_P327751 | Ifit1         | -8.10  | chr19 | 34723796  | 34723855  | interferon-induced protein with tetratricopeptide repeats 1                 |
| A_52_P533146 | Ddit3         | -8.10  | chr10 | 126732518 | 126732821 | DNA-damage inducible transcript 3                                           |
| A_52_P232580 | Dyrk3         | -8.02  | chr1  | 133025135 | 133025194 | dual-specificity tyrosine-(Y)-phosphorylation regulated kinase 3            |
| A_51_P207591 | Anxa8         | -8.01  | chr14 | 34913661  | 34913720  | annexin A8                                                                  |
| A_51_P328631 | Sis           | -7.96  | chr3  | 72692810  | 72692869  | sucrase isomaltase (alpha-glucosidase)                                      |
| A_52_P267564 | Creb5         | -7.91  | chr6  | 53645736  | 53645795  | cAMP responsive element binding protein 5                                   |
| A_52_P403484 | Ptpn2         | -7.90  | chr18 | 67831676  | 67831735  | protein tyrosine phosphatase, non-receptor type 2                           |
| A_52_P483101 | Lpin1         | -7.84  | chr12 | 16544129  | 16544188  | lipin 1                                                                     |
| A_52_P593965 | Fdps          | -7.72  | chr3  | 88903026  | 88903085  | farnesyl diphosphate synthetase                                             |
| A_52_P172441 | Fitm2         | -7.68  | chr2  | 163294444 | 163294503 | fat storage-inducing transmembrane protein 2                                |
| A_51_P236846 | F3            | -7.50  | chr3  | 121437335 | 121437394 | coagulation factor III                                                      |
| A_51_P315785 | Tnfrsf6       | -7.39  | chr2  | 51912004  | 51912063  | tumor necrosis factor alpha induced protein 6                               |
| A_51_P279038 | Ppargc1a      | -7.37  | chr5  | 51848928  | 51848987  | peroxisome proliferative activated receptor, gamma, coactivator 1 alpha     |
| A_52_P208763 | Ccl7          | -7.32  | chr11 | 81860504  | 81860563  | chemokine (C-C motif) ligand 7                                              |
| A_51_P325904 | Inhbb         | -7.20  | chr1  | 121312083 | 121312142 | inhibin beta-B                                                              |
| A_52_P683413 | F3            | -7.20  | chr3  | 121437295 | 121437354 | coagulation factor III                                                      |
| A_51_P292403 | Sdc2          | -7.18  | chr15 | 32962294  | 32962353  | syndecan 2                                                                  |
| A_51_P501554 | Tm4sf20       | -7.17  | chr1  | 82753547  | 82753606  | transmembrane 4 L six family member 20                                      |
| A_52_P232813 | Cxcl3         | -7.10  | chr5  | 91216694  | 91216753  | chemokine (C-X-C motif) ligand 3                                            |
| A_52_P650453 | Spink4        | -7.01  | chr4  | 40876206  | 40878330  | serine peptidase inhibitor, Kazal type 4                                    |
| A_52_P5945   | Ppargc1a      | -6.95  | chr5  | 51846897  | 51846956  | peroxisome proliferative activated receptor, gamma, coactivator 1 alpha     |
| A_51_P437079 | 5730559C18Rik | -6.94  | chr1  | 138110704 | 138110763 | RIKEN cDNA 5730559C18 gene                                                  |
| A_51_P243514 | Macc1         | -6.85  | chr12 | 120705295 | 120705354 | metastasis associated in colon cancer 1                                     |
| A_51_P136143 | Aloxe3        | -6.69  | chr11 | 68962402  | 68962461  | arachidonate lipoxygenase 3                                                 |
| A_51_P257951 | Retnla        | -6.67  | chr16 | 48844447  | 48844506  | resistin like alpha                                                         |
| A_51_P305896 | Cftr          | -6.61  | chr6  | 18272483  | 18272542  | cystic fibrosis transmembrane conductance regulator                         |
| A_51_P380078 | Fcgbp         | -6.59  | chr7  | 28905517  | 28905576  | Fc fragment of IgG binding protein                                          |
| A_51_P394115 | Aadac         | -6.43  | chr3  | 59843885  | 59843944  | arylacetamide deacetylase                                                   |
| A_51_P464000 | Ghrl          | -6.21  | chr6  | 113667101 | 113669108 | ghrelin                                                                     |
| A_51_P337269 | Aldob         | -6.21  | chr4  | 49549408  | 49549467  | aldolase B, fructose-bisphosphate                                           |
| A_52_P405465 | Piga          | -6.18  | chrX  | 160869912 | 160869971 | phosphatidylinositol glycan anchor biosynthesis, class A                    |
| A_52_P386754 | Blcap         | -6.16  | chr2  | 157390091 | 157390150 | bladder cancer associated protein                                           |
| A_52_P342860 | Ces1c         | -6.12  | chr8  | 95622965  | 95623024  | carboxylesterase 1C                                                         |
| A_51_P343647 | Zfp871        | -6.05  | chr17 | 32910629  | 32910688  | zinc finger protein 871                                                     |
| A_51_P346565 | Sdk2          | -6.04  | chr11 | 113709878 | 113709937 | sidekick cell adhesion molecule 2                                           |
| A_52_P681557 | Naaladl2      | -6.00  | chr3  | 23703403  | 23703462  | N-acetylated alpha-linked acidic dipeptidase-like 2                         |
| A_51_P514085 | Mx2           | -5.98  | chr16 | 97782327  | 97782386  | MX dynamin-like GTPase 2                                                    |
| A_51_P325173 | Tpm1          | -5.97  | chr9  | 66875959  | 66877514  | tropomyosin 1, alpha                                                        |
| A_51_P418434 | Lrrc18        | -5.97  | chr14 | 33822272  | 33822331  | leucine rich repeat containing 18                                           |
| A_51_P103435 | RspH4a        | -5.92  | chr10 | 33635246  | 33635305  | radial spoke head 4 homolog A (Chlamydomonas)                               |
| A_52_P371949 | Elf6          | -5.87  | chr2  | 155650902 | 155650961 | eukaryotic translation initiation factor 6                                  |
| A_52_P258557 | Slc26a9       | -5.83  | chr1  | 133666246 | 133666305 | solute carrier family 26, member 9                                          |



|              |               |       |       |           |           |                                                                          |
|--------------|---------------|-------|-------|-----------|-----------|--------------------------------------------------------------------------|
| A_51_P505134 | Rsad2         | -5.83 | chr12 | 27130424  | 27133462  | radical S-adenosyl methionine domain containing 2                        |
| A_51_P279693 | Cyp1a1        | -5.82 | chr9  | 57551535  | 57551594  | cytochrome P450, family 1, subfamily a, polypeptide 1                    |
| A_52_P120803 | Ankrd1        | -5.78 | chr19 | 36186809  | 36186868  | ankyrin repeat domain 1 (cardiac muscle)                                 |
| A_51_P507622 | Itpkc         | -5.76 | chr7  | 27992416  | 27992475  | inositol 1,4,5-trisphosphate 3-kinase C                                  |
| A_52_P276348 | Adh6a         | -5.75 | chr3  | 137990401 | 137990460 | alcohol dehydrogenase 6A (class V)                                       |
| A_52_P799815 | Tmem171       | -5.74 | chr13 | 99456355  | 99456414  | transmembrane protein 171                                                |
| A_52_P419455 | Adora2b       | -5.70 | chr11 | 62079096  | 62079155  | adenosine A2b receptor                                                   |
| A_51_P267783 | Il11          | -5.69 | chr7  | 4724847   | 4724906   | interleukin 11                                                           |
| A_52_P591017 | Tpbp          | -5.64 | chr9  | 85739295  | 85739354  | trophoblast glycoprotein                                                 |
| A_51_P209372 | Msmo1         | -5.62 | chr8  | 67196982  | 67197041  | methylsterol monooxygenase 1                                             |
| A_51_P342567 | Akap12        | -5.60 | chr10 | 5987207   | 5987266   | A kinase (PRKA) anchor protein (gravin) 12                               |
| A_52_P185136 | Ddo           | -5.59 | chr10 | 40361220  | 40361279  | D-aspartate oxidase                                                      |
| A_51_P510156 | Lcn2          | -5.58 | chr2  | 32241037  | 32241281  | lipocalin 2                                                              |
| A_51_P294375 | 5730559C18Rik | -5.55 | chr1  | 138120169 | 138120228 | RIKEN cDNA 5730559C18 gene                                               |
| A_51_P488739 | Hcar2         | -5.51 | chr5  | 124313731 | 124313790 | hydroxycarboxylic acid receptor 2                                        |
| A_52_P643165 | Samd4         | -5.50 | chr14 | 47725267  | 47725326  | sterile alpha motif domain containing 4                                  |
| A_51_P204252 | Efhb          | -5.48 | chr17 | 53538265  | 53538324  | EF hand domain family, member B                                          |
| A_51_P131408 | Tnfrsf12a     | -5.46 | chr17 | 23812746  | 23812805  | tumor necrosis factor receptor superfamily, member 12a                   |
| A_51_P108266 | Actn2         | -5.45 | chr13 | 12364990  | 12367362  | actinin alpha 2                                                          |
| A_51_P461684 | Gprc5a        | -5.39 | chr6  | 135034502 | 135034561 | G protein-coupled receptor, family C, group 5, member A                  |
| A_52_P106620 | Tnfrsf11b     | -5.38 | chr15 | 54082760  | 54082819  | tumor necrosis factor receptor superfamily, member 11b (osteoprotegerin) |
| A_51_P339793 | Il1rl1        | -5.37 | chr1  | 40504769  | 40504828  | interleukin 1 receptor-like 1                                            |
| A_51_P418432 | Lrrc18        | -5.35 | chr14 | 33822400  | 33827014  | leucine rich repeat containing 18                                        |
| A_51_P337210 | Lrrc4         | -5.35 | chr6  | 28779538  | 28779597  | leucine rich repeat containing 4                                         |
| A_51_P356642 | Krt19         | -5.31 | chr11 | 100002392 | 100002451 | keratin 19                                                               |
| A_52_P419505 | Galnt3        | -5.30 | chr2  | 65932874  | 65932933  | polypeptide N-acetylgalactosaminyltransferase 3                          |
| A_51_P485756 | Nts           | -5.28 | chr10 | 101944967 | 101945026 | neurotensin                                                              |
| A_51_P298837 | Spock1        | -5.26 | chr13 | 57527452  | 57527491  | sparc/osteonectin, cwcv and kazal-like domains proteoglycan 1            |
| A_51_P381208 | Ngf           | -5.25 | chr3  | 102324829 | 102324888 | nerve growth factor                                                      |
| A_52_P670026 | Rsad2         | -5.23 | chr12 | 27127859  | 27127918  | radical S-adenosyl methionine domain containing 2                        |
| A_51_P451292 | Phactr3       | -5.22 | chr2  | 178070557 | 178070616 | phosphatase and actin regulator 3                                        |
| A_51_P296608 | Gadd45a       | -5.21 | chr6  | 66985376  | 66985435  | growth arrest and DNA-damage-inducible 45 alpha                          |
| A_52_P174166 | Ksr2          | -5.18 | chr5  | 118215982 | 118216041 | kinase suppressor of ras 2                                               |
| A_52_P207194 | Dgkg          | -5.12 | chr16 | 22596965  | 22597024  | diacylglycerol kinase, gamma                                             |
| A_51_P505132 | Rsad2         | -5.11 | chr12 | 27135585  | 27138886  | radical S-adenosyl methionine domain containing 2                        |
| A_51_P286737 | Ccl2          | -5.10 | chr11 | 81850650  | 81850709  | chemokine (C-C motif) ligand 2                                           |
| A_52_P563375 | Lgals2        | -5.05 | chr15 | 78681315  | 78681374  | lectin, galactose-binding, soluble 2                                     |
| A_52_P617327 | Rcan1         | -5.04 | chr16 | 92392763  | 92392822  | regulator of calcineurin 1                                               |
| A_52_P518997 | Epha2         | -5.04 | chr4  | 140885139 | 140885198 | Eph receptor A2                                                          |
| A_52_P621588 | Ifnlr1        | -5.01 | chr4  | 135263946 | 135264005 | interferon lambda receptor 1                                             |
| A_51_P297069 | Tmod1         | -5.00 | chr4  | 46127384  | 46127441  | tropomodulin 1                                                           |
