# Supplementary material
Source: publisher figshare collection journal article supplement (https://diabetesjournals.figshare.com/articles/dataset/_/19607322)
Supplement: Supplementary file 4 [file 2]

## Supplementary Table 5

10 day old NOD vs. NOD.B10 islets: GO terms associated with differentially changed genes (FDR q-value < 0.05)

10 day old NOD islets: GO terms associated with genes upregulated by ≥3-fold

| GO term    | Description                                      | P-value  | FDR q-value | Enrichment (N, B, n, b)*  |
|------------|--------------------------------------------------|----------|-------------|---------------------------|
| GO:0031045 | dense core granule                               | 2.41E-06 | 1.56E-03    | 14.00 (15592,17,393,6)    |
| GO:0030425 | dendrite                                         | 2.23E-06 | 2.16E-03    | 2.58 (15592,462,393,30)   |
| GO:0044297 | cell body                                        | 9.46E-06 | 3.66E-03    | 2.21 (15592,627,393,35)   |
| GO:0043005 | neuron projection                                | 1.93E-06 | 3.74E-03    | 1.96 (15592,1075,393,53)  |
| GO:0120025 | plasma membrane bounded cell projection          | 8.17E-06 | 3.95E-03    | 1.72 (15592,1524,393,66)  |
| GO:0097458 | neuron part                                      | 1.31E-05 | 4.24E-03    | 1.65 (15592,1704,393,71)  |
| GO:0045202 | synapse                                          | 2.78E-05 | 7.68E-03    | 1.89 (15592,943,393,45)   |
| GO:0032940 | secretion by cell                                | 7.14E-06 | 1.54E-02    | 2.77 (15592,344,393,24)   |
| GO:0046887 | positive regulation of hormone secretion         | 6.44E-06 | 1.62E-02    | 3.94 (15592,151,393,15)   |
| GO:0044463 | cell projection part                             | 7.53E-05 | 1.62E-02    | 1.68 (15592,1319,393,56)  |
| GO:0023061 | signal release                                   | 1.08E-06 | 1.63E-02    | 4.54 (15592,131,393,15)   |
| GO:0032024 | positive regulation of insulin secretion         | 5.65E-06 | 1.71E-02    | 5.39 (15592,81,393,11)    |
| GO:0090277 | positive regulation of peptide hormone secretion | 3.56E-06 | 1.79E-02    | 4.73 (15592,109,393,13)   |
| GO:0051648 | vesicle localization                             | 9.47E-06 | 1.79E-02    | 4.33 (15592,119,393,13)   |
| GO:0120038 | plasma membrane bounded cell projection part     | 7.53E-05 | 1.82E-02    | 1.68 (15592,1319,393,56)  |
| GO:0010817 | regulation of hormone levels                     | 5.01E-06 | 1.89E-02    | 2.47 (15592,481,393,30)   |
| GO:0009914 | hormone transport                                | 1.14E-05 | 1.91E-02    | 5.02 (15592,87,393,11)    |
| GO:0051650 | establishment of vesicle localization            | 2.59E-06 | 1.96E-02    | 4.87 (15592,106,393,13)   |
| GO:0090276 | regulation of peptide hormone secretion          | 1.57E-05 | 1.97E-02    | 3.32 (15592,203,393,17)   |
| GO:0030072 | peptide hormone secretion                        | 1.54E-05 | 2.12E-02    | 6.05 (15592,59,393,9)     |
| GO:0046883 | regulation of hormone secretion                  | 1.85E-05 | 2.16E-02    | 2.93 (15592,271,393,20)   |
| GO:0051179 | localization                                     | 1.54E-05 | 2.32E-02    | 1.41 (15592,3393,393,121) |
| GO:0050796 | regulation of insulin secretion                  | 2.17E-05 | 2.34E-02    | 3.56 (15592,167,393,15)   |
| GO:0042995 | cell projection                                  | 1.24E-04 | 2.40E-02    | 1.55 (15592,1794,393,70)  |
| GO:0034448 | EGO complex                                      | 1.53E-04 | 2.69E-02    | 23.80 (15592,5,393,3)     |
| GO:0042026 | protein refolding                                | 2.91E-05 | 2.93E-02    | 9.52 (15592,25,393,6)     |
| GO:0046879 | hormone secretion                                | 3.52E-05 | 3.13E-02    | 4.90 (15592,81,393,10)    |
| GO:0006810 | transport                                        | 3.37E-05 | 3.18E-02    | 1.45 (15592,2821,393,103) |
| GO:0051234 | establishment of localization                    | 4.28E-05 | 3.60E-02    | 1.43 (15592,2941,393,106) |
| GO:0030073 | insulin secretion                                | 5.57E-05 | 3.83E-02    | 6.94 (15592,40,393,7)     |
| GO:0010970 | transport along microtubule                      | 5.40E-05 | 3.89E-02    | 3.68 (15592,140,393,13)   |
| GO:0099111 | microtubule-based transport                      | 5.40E-05 | 4.08E-02    | 3.68 (15592,140,393,13)   |
| GO:0046903 | secretion                                        | 5.18E-05 | 4.12E-02    | 2.35 (15592,439,393,26)   |
| GO:0099523 | presynaptic cytosol                              | 2.84E-04 | 4.58E-02    | 8.27 (15592,24,393,5)     |
| GO:0043025 | neuronal cell body                               | 3.10E-04 | 4.62E-02    | 2.03 (15592,546,393,28)   |

10 day old NOD islets: GO terms associated with genes upregulated by ≥3-fold

| GO term    | Description                                                                            | P-value  | FDR q-value | Enrichment (N, B, n, b)*  |
|------------|----------------------------------------------------------------------------------------|----------|-------------|---------------------------|
| GO:0031012 | extracellular matrix                                                                   | 2.78E-29 | 5.39E-26    | 8.03 (15592,415,220,47)   |
| GO:0062023 | collagen-containing extracellular matrix                                               | 2.34E-26 | 2.26E-23    | 8.75 (15592,324,220,40)   |
| GO:0005201 | extracellular matrix structural constituent                                            | 5.22E-22 | 2.30E-18    | 14.17 (15592,125,220,25)  |
| GO:0044421 | extracellular region part                                                              | 1.90E-20 | 1.23E-17    | 3.43 (15592,1407,220,68)  |
| GO:0005576 | extracellular region                                                                   | 6.81E-20 | 3.29E-17    | 3.59 (15592,1243,220,63)  |
| GO:0005615 | extracellular space                                                                    | 3.02E-18 | 1.17E-15    | 3.59 (15592,1144,220,58)  |
| GO:0009653 | anatomical structure morphogenesis                                                     | 8.80E-20 | 1.33E-15    | 3.52 (15592,1288,220,64)  |
| GO:0007155 | cell adhesion                                                                          | 8.50E-15 | 6.42E-11    | 4.31 (15592,642,220,39)   |
| GO:0022610 | biological adhesion                                                                    | 1.34E-14 | 6.74E-11    | 4.25 (15592,651,220,39)   |
| GO:0050793 | regulation of developmental process                                                    | 1.88E-14 | 7.09E-11    | 2.39 (15592,2314,220,78)  |
| GO:0048869 | cellular developmental process                                                         | 6.70E-14 | 1.45E-10    | 2.30 (15592,2470,220,80)  |
| GO:0051239 | regulation of multicellular organismal process                                         | 6.01E-14 | 1.51E-10    | 2.21 (15592,2724,220,85)  |
| GO:0045595 | regulation of cell differentiation                                                     | 5.85E-14 | 1.77E-10    | 2.71 (15592,1645,220,63)  |
| GO:0030198 | extracellular matrix organization                                                      | 1.15E-13 | 2.17E-10    | 7.68 (15592,203,220,22)   |
| GO:0032502 | developmental process                                                                  | 1.31E-13 | 2.19E-10    | 1.89 (15592,4054,220,108) |
| GO:0048856 | anatomical structure development                                                       | 2.33E-13 | 3.53E-10    | 2.14 (15592,2842,220,86)  |
| GO:2000026 | regulation of multicellular organismal development                                     | 3.77E-13 | 5.18E-10    | 2.52 (15592,1854,220,66)  |
| GO:0048729 | tissue morphogenesis                                                                   | 5.46E-13 | 6.88E-10    | 5.29 (15592,375,220,28)   |
| GO:0048513 | animal organ development                                                               | 6.18E-13 | 7.18E-10    | 3.10 (15592,1119,220,49)  |
| GO:0045596 | negative regulation of cell differentiation                                            | 1.04E-12 | 1.12E-09    | 3.88 (15592,675,220,37)   |
| GO:0043062 | extracellular structure organization                                                   | 1.62E-12 | 1.63E-09    | 6.75 (15592,231,220,22)   |
| GO:0051093 | negative regulation of developmental process                                           | 1.97E-12 | 1.86E-09    | 3.34 (15592,913,220,43)   |
| GO:0030154 | cell differentiation                                                                   | 8.61E-12 | 7.65E-09    | 2.45 (15592,1791,220,62)  |
| GO:0007166 | cell surface receptor signaling pathway                                                | 1.00E-11 | 8.43E-09    | 2.79 (15592,1294,220,51)  |
| GO:0051241 | negative regulation of multicellular organismal process                                | 1.97E-11 | 1.57E-08    | 2.91 (15592,1145,220,47)  |
| GO:0009887 | animal organ morphogenesis                                                             | 3.45E-11 | 2.60E-08    | 4.30 (15592,478,220,29)   |
| GO:0030199 | collagen fibril organization                                                           | 3.83E-11 | 2.76E-08    | 16.59 (15592,47,220,11)   |
| GO:0005198 | structural molecule activity                                                           | 1.49E-11 | 3.29E-08    | 4.17 (15592,527,220,31)   |
| GO:0005581 | collagen trimer                                                                        | 2.39E-10 | 7.71E-08    | 12.15 (15592,70,220,12)   |
| GO:0090287 | regulation of cellular response to growth factor stimulus                              | 2.64E-10 | 1.81E-07    | 5.81 (15592,244,220,20)   |
| GO:0060411 | cardiac septum morphogenesis                                                           | 2.84E-10 | 1.87E-07    | 11.98 (15592,71,220,12)   |
| GO:0048646 | anatomical structure formation involved in morphogenesis                               | 4.38E-10 | 2.76E-07    | 3.45 (15592,677,220,33)   |
| GO:0044420 | extracellular matrix component                                                         | 1.04E-09 | 2.89E-07    | 14.77 (15592,48,220,10)   |
| GO:0009986 | cell surface                                                                           | 2.50E-09 | 6.04E-07    | 3.58 (15592,574,220,29)   |
| GO:0009888 | tissue development                                                                     | 1.67E-09 | 9.72E-07    | 3.64 (15592,564,220,29)   |
| GO:0060412 | ventricular septum morphogenesis                                                       | 1.66E-09 | 1.00E-06    | 17.24 (15592,37,220,9)    |
| GO:0030510 | regulation of BMP signaling pathway                                                    | 2.82E-09 | 1.58E-06    | 9.89 (15592,86,220,12)    |
| GO:0005604 | basement membrane                                                                      | 1.15E-08 | 2.46E-06    | 8.77 (15592,97,220,12)    |
| GO:0060415 | muscle tissue morphogenesis                                                            | 4.88E-09 | 2.64E-06    | 10.83 (15592,72,220,11)   |
| GO:0090092 | regulation of transmembrane receptor protein serine/threonine kinase signaling pathway | 5.94E-09 | 3.09E-06    | 5.82 (15592,207,220,17)   |
| GO:0032501 | multicellular organismal process                                                       | 6.26E-09 | 3.15E-06    | 1.83 (15592,3142,220,81)  |
| GO:0019838 | growth factor binding                                                                  | 7.63E-09 | 8.41E-06    | 7.30 (15592,136,220,14)   |
| GO:0048598 | embryonic morphogenesis                                                                | 2.21E-08 | 1.08E-05    | 4.10 (15592,380,220,22)   |
| GO:0005539 | glycosaminoglycan binding                                                              | 7.45E-09 | 1.09E-05    | 6.16 (15592,184,220,16)   |
| GO:0010810 | regulation of cell-substrate adhesion                                                  | 2.45E-08 | 1.16E-05    | 5.67 (15592,200,220,16)   |
| GO:0042127 | regulation of cell proliferation                                                       | 2.63E-08 | 1.21E-05    | 2.34 (15592,1426,220,47)  |

|            |                                                                                                 |          |          |                           |
|------------|-------------------------------------------------------------------------------------------------|----------|----------|---------------------------|
| GO:0030020 | extracellular matrix structural constituent conferring tensile strength                         | 1.83E-08 | 1.35E-05 | 16.68 (15592,34,220,8)    |
| GO:0048583 | regulation of response to stimulus                                                              | 3.10E-08 | 1.38E-05 | 1.78 (15592,3193,220,80)  |
| GO:0005509 | calcium ion binding                                                                             | 1.82E-08 | 1.60E-05 | 3.58 (15592,515,220,26)   |
| GO:0007275 | multicellular organism development                                                              | 5.11E-08 | 2.09E-05 | 2.51 (15592,1128,220,40)  |
| GO:0035295 | tube development                                                                                | 4.92E-08 | 2.12E-05 | 5.81 (15592,183,220,15)   |
| GO:0007167 | enzyme linked receptor protein signaling pathway                                                | 5.11E-08 | 2.14E-05 | 3.76 (15592,433,220,23)   |
| GO:0022603 | regulation of anatomical structure morphogenesis                                                | 5.88E-08 | 2.34E-05 | 2.67 (15592,955,220,36)   |
| GO:0009966 | regulation of signal transduction                                                               | 7.59E-08 | 2.94E-05 | 1.91 (15592,2409,220,65)  |
| GO:0005102 | signaling receptor binding                                                                      | 5.88E-08 | 3.70E-05 | 2.36 (15592,1320,220,44)  |
| GO:2000145 | regulation of cell motility                                                                     | 1.06E-07 | 3.99E-05 | 2.76 (15592,847,220,33)   |
| GO:0006357 | regulation of transcription by RNA polymerase II                                                | 1.35E-07 | 4.86E-05 | 2.12 (15592,1705,220,51)  |
| GO:0030334 | regulation of cell migration                                                                    | 1.34E-07 | 4.95E-05 | 2.79 (15592,813,220,32)   |
| GO:0035239 | tube morphogenesis                                                                              | 1.52E-07 | 5.33E-05 | 4.41 (15592,289,220,18)   |
| GO:0060429 | epithelium development                                                                          | 1.63E-07 | 5.60E-05 | 5.74 (15592,173,220,14)   |
| GO:0090101 | negative regulation of transmembrane receptor protein serine/threonine kinase signaling pathway | 1.80E-07 | 6.03E-05 | 7.72 (15592,101,220,11)   |
| GO:0048523 | negative regulation of cellular process                                                         | 2.02E-07 | 6.65E-05 | 1.62 (15592,3992,220,91)  |
| GO:0051270 | regulation of cellular component movement                                                       | 2.25E-07 | 7.09E-05 | 2.62 (15592,919,220,34)   |
| GO:0055008 | cardiac muscle tissue morphogenesis                                                             | 2.30E-07 | 7.10E-05 | 10.12 (15592,63,220,9)    |
| GO:0040012 | regulation of locomotion                                                                        | 2.25E-07 | 7.24E-05 | 2.62 (15592,919,220,34)   |
| GO:0010646 | regulation of cell communication                                                                | 2.51E-07 | 7.59E-05 | 1.79 (15592,2767,220,70)  |
| GO:0060284 | regulation of cell development                                                                  | 2.59E-07 | 7.67E-05 | 2.56 (15592,969,220,35)   |
| GO:2000027 | regulation of animal organ morphogenesis                                                        | 2.66E-07 | 7.74E-05 | 5.51 (15592,180,220,14)   |
| GO:0090288 | negative regulation of cellular response to growth factor stimulus                              | 2.83E-07 | 8.07E-05 | 6.59 (15592,129,220,12)   |
| GO:0023051 | regulation of signaling                                                                         | 3.10E-07 | 8.69E-05 | 1.78 (15592,2782,220,70)  |
| GO:1903707 | negative regulation of hemopoiesis                                                              | 4.64E-07 | 1.28E-04 | 6.30 (15592,135,220,12)   |
| GO:0030155 | regulation of cell adhesion                                                                     | 5.94E-07 | 1.60E-04 | 3.00 (15592,615,220,26)   |
| GO:1902106 | negative regulation of leukocyte differentiation                                                | 6.05E-07 | 1.60E-04 | 7.79 (15592,91,220,10)    |
| GO:0001503 | ossification                                                                                    | 6.77E-07 | 1.76E-04 | 6.78 (15592,115,220,11)   |
| GO:0048731 | system development                                                                              | 8.26E-07 | 2.12E-04 | 2.87 (15592,667,220,27)   |
| GO:0030021 | extracellular matrix structural constituent conferring compression resistance                   | 3.90E-07 | 2.15E-04 | 29.53 (15592,12,220,5)    |
| GO:0010628 | positive regulation of gene expression                                                          | 9.97E-07 | 2.51E-04 | 2.02 (15592,1715,220,49)  |
| GO:0005912 | adherens junction                                                                               | 1.47E-06 | 2.85E-04 | 4.20 (15592,270,220,16)   |
| GO:0010717 | regulation of epithelial to mesenchymal transition                                              | 1.18E-06 | 2.88E-04 | 8.39 (15592,76,220,9)     |
| GO:0051094 | positive regulation of developmental process                                                    | 1.17E-06 | 2.89E-04 | 2.20 (15592,1320,220,41)  |
| GO:0032989 | cellular component morphogenesis                                                                | 1.25E-06 | 2.99E-04 | 3.25 (15592,480,220,22)   |
| GO:0003179 | heart valve morphogenesis                                                                       | 1.27E-06 | 3.00E-04 | 12.40 (15592,40,220,7)    |
| GO:0048519 | negative regulation of biological process                                                       | 1.32E-06 | 3.06E-04 | 1.53 (15592,4404,220,95)  |
| GO:0003184 | pulmonary valve morphogenesis                                                                   | 1.43E-06 | 3.28E-04 | 23.62 (15592,15,220,5)    |
| GO:0010468 | regulation of gene expression                                                                   | 1.55E-06 | 3.49E-04 | 1.66 (15592,3194,220,75)  |
| GO:1905330 | regulation of morphogenesis of an epithelium                                                    | 1.60E-06 | 3.55E-04 | 7.02 (15592,101,220,10)   |
| GO:0097435 | supramolecular fiber organization                                                               | 1.66E-06 | 3.63E-04 | 3.58 (15592,376,220,19)   |
| GO:0070161 | anchoring junction                                                                              | 2.15E-06 | 3.79E-04 | 4.08 (15592,278,220,16)   |
| GO:0008284 | positive regulation of cell proliferation                                                       | 1.84E-06 | 3.92E-04 | 2.57 (15592,826,220,30)   |
| GO:0048704 | embryonic skeletal system morphogenesis                                                         | 1.83E-06 | 3.95E-04 | 7.97 (15592,80,220,9)     |
| GO:0010721 | negative regulation of cell development                                                         | 2.00E-06 | 4.21E-04 | 3.70 (15592,345,220,18)   |
| GO:0003180 | aortic valve morphogenesis                                                                      | 2.06E-06 | 4.26E-04 | 22.15 (15592,16,220,5)    |
| GO:0036075 | replacement ossification                                                                        | 2.67E-06 | 5.38E-04 | 14.66 (15592,29,220,6)    |
| GO:0001958 | endochondral ossification                                                                       | 2.67E-06 | 5.45E-04 | 14.66 (15592,29,220,6)    |
| GO:0007162 | negative regulation of cell adhesion                                                            | 3.14E-06 | 6.24E-04 | 4.20 (15592,253,220,15)   |
| GO:0030324 | lung development                                                                                | 3.38E-06 | 6.63E-04 | 7.42 (15592,86,220,9)     |
| GO:0030178 | negative regulation of Wnt signaling pathway                                                    | 3.57E-06 | 6.93E-04 | 5.73 (15592,136,220,11)   |
| GO:0007389 | pattern specification process                                                                   | 4.08E-06 | 7.71E-04 | 3.68 (15592,327,220,17)   |
| GO:0048585 | negative regulation of response to stimulus                                                     | 4.14E-06 | 7.72E-04 | 2.09 (15592,1388,220,41)  |
| GO:0016339 | calcium-dependent cell-cell adhesion via plasma membrane cell adhesion molecules                | 4.04E-06 | 7.73E-04 | 13.72 (15592,31,220,6)    |
| GO:0030514 | negative regulation of BMP signaling pathway                                                    | 4.56E-06 | 8.01E-04 | 10.34 (15592,48,220,7)    |
| GO:0048518 | positive regulation of biological process                                                       | 4.45E-06 | 8.10E-04 | 1.45 (15592,5036,220,103) |
| GO:0008283 | cell proliferation                                                                              | 4.56E-06 | 8.10E-04 | 3.10 (15592,480,220,21)   |
| GO:0072073 | kidney epithelium development                                                                   | 4.41E-06 | 8.13E-04 | 8.46 (15592,67,220,8)     |
| GO:0009719 | response to endogenous stimulus                                                                 | 4.54E-06 | 8.17E-04 | 2.62 (15592,730,220,27)   |
| GO:0009893 | positive regulation of metabolic process                                                        | 4.75E-06 | 8.25E-04 | 1.65 (15592,3050,220,71)  |
| GO:0048705 | skeletal system morphogenesis                                                                   | 4.83E-06 | 8.29E-04 | 6.22 (15592,114,220,10)   |
| GO:0050839 | cell adhesion molecule binding                                                                  | 1.71E-06 | 8.39E-04 | 4.72 (15592,210,220,14)   |
| GO:0045665 | negative regulation of neuron differentiation                                                   | 5.22E-06 | 8.87E-04 | 4.30 (15592,231,220,14)   |
| GO:0031328 | positive regulation of cellular biosynthetic process                                            | 5.58E-06 | 9.37E-04 | 1.96 (15592,1663,220,46)  |
| GO:0001656 | metanephros development                                                                         | 5.94E-06 | 9.86E-04 | 12.89 (15592,33,220,6)    |
| GO:0030279 | negative regulation of ossification                                                             | 6.16E-06 | 1.01E-03 | 8.10 (15592,70,220,8)     |
| GO:0030335 | positive regulation of cell migration                                                           | 6.88E-06 | 1.12E-03 | 3.02 (15592,493,220,21)   |
| GO:0048562 | embryonic organ morphogenesis                                                                   | 7.10E-06 | 1.14E-03 | 5.96 (15592,119,220,10)   |
| GO:0040017 | positive regulation of locomotion                                                               | 7.20E-06 | 1.15E-03 | 2.91 (15592,535,220,22)   |
| GO:0006355 | regulation of transcription, DNA-templated                                                      | 7.50E-06 | 1.17E-03 | 1.75 (15592,2393,220,59)  |
| GO:0016477 | cell migration                                                                                  | 7.47E-06 | 1.18E-03 | 2.61 (15592,706,220,26)   |
| GO:0051240 | positive regulation of multicellular organismal process                                         | 8.24E-06 | 1.26E-03 | 1.95 (15592,1635,220,45)  |
| GO:1903506 | regulation of nucleic acid-templated transcription                                              | 8.21E-06 | 1.27E-03 | 1.74 (15592,2400,220,59)  |
| GO:0048522 | positive regulation of cellular process                                                         | 8.42E-06 | 1.27E-03 | 1.47 (15592,4519,220,94)  |
| GO:0051173 | positive regulation of nitrogen compound metabolic process                                      | 8.84E-06 | 1.32E-03 | 1.68 (15592,2692,220,64)  |
| GO:0003181 | atrioventricular valve morphogenesis                                                            | 9.04E-06 | 1.33E-03 | 16.87 (15592,21,220,5)    |
| GO:2001141 | regulation of RNA biosynthetic process                                                          | 9.23E-06 | 1.33E-03 | 1.74 (15592,2409,220,59)  |
| GO:0031325 | positive regulation of cellular metabolic process                                               | 9.36E-06 | 1.33E-03 | 1.66 (15592,2813,220,66)  |
| GO:0010604 | positive regulation of macromolecule metabolic process                                          | 9.03E-06 | 1.34E-03 | 1.66 (15592,2810,220,66)  |
| GO:0098742 | cell-cell adhesion via plasma-membrane adhesion molecules                                       | 9.20E-06 | 1.34E-03 | 5.20 (15592,150,220,11)   |
| GO:0009891 | positive regulation of biosynthetic process                                                     | 9.51E-06 | 1.34E-03 | 1.92 (15592,1697,220,46)  |
| GO:0045893 | positive regulation of transcription, DNA-templated                                             | 9.96E-06 | 1.38E-03 | 2.07 (15592,1337,220,39)  |
| GO:2000147 | positive regulation of cell motility                                                            | 9.92E-06 | 1.39E-03 | 2.95 (15592,505,220,21)   |
| GO:1903508 | positive regulation of nucleic acid-templated transcription                                     | 1.05E-05 | 1.44E-03 | 2.06 (15592,1340,220,39)  |
| GO:1902680 | positive regulation of RNA biosynthetic process                                                 | 1.07E-05 | 1.45E-03 | 2.06 (15592,1341,220,39)  |
| GO:0072300 | positive regulation of metanephric glomerulus development                                       | 1.10E-05 | 1.48E-03 | 53.15 (15592,4,220,3)     |
| GO:0019222 | regulation of metabolic process                                                                 | 1.11E-05 | 1.48E-03 | 1.43 (15592,5000,220,101) |
| GO:0019220 | regulation of phosphate metabolic process                                                       | 1.16E-05 | 1.54E-03 | 1.98 (15592,1500,220,42)  |
| GO:0051174 | regulation of phosphorus metabolic process                                                      | 1.18E-05 | 1.56E-03 | 1.98 (15592,1501,220,42)  |
| GO:0001932 | regulation of protein phosphorylation                                                           | 1.20E-05 | 1.56E-03 | 2.10 (15592,1247,220,37)  |
| GO:0008201 | heparin binding                                                                                 | 3.84E-06 | 1.69E-03 | 5.69 (15592,137,220,11)   |
| GO:0033627 | cell adhesion mediated by integrin                                                              | 1.46E-05 | 1.89E-03 | 15.41 (15592,23,220,5)    |
| GO:0005583 | fibrillar collagen trimer                                                                       | 1.18E-05 | 1.90E-03 | 25.77 (15592,11,220,4)    |

|            |                                                                                      |          |          |                           |
|------------|--------------------------------------------------------------------------------------|----------|----------|---------------------------|
| GO:0051272 | positive regulation of cellular component movement                                   | 1.54E-05 | 1.97E-03 | 2.86 (15592,520,220,21)   |
| GO:0008285 | negative regulation of cell proliferation                                            | 1.62E-05 | 2.05E-03 | 2.69 (15592,606,220,23)   |
| GO:0045581 | negative regulation of T cell differentiation                                        | 1.63E-05 | 2.05E-03 | 10.90 (15592,39,220,6)    |
| GO:0031345 | negative regulation of cell projection organization                                  | 1.65E-05 | 2.06E-03 | 4.48 (15592,190,220,12)   |
| GO:0060255 | regulation of macromolecule metabolic process                                        | 1.68E-05 | 2.08E-03 | 1.45 (15592,4590,220,94)  |
| GO:0090179 | planar cell polarity pathway involved in neural tube closure                         | 1.75E-05 | 2.13E-03 | 23.62 (15592,12,220,4)    |
| GO:0030278 | regulation of ossification                                                           | 1.74E-05 | 2.14E-03 | 4.45 (15592,191,220,12)   |
| GO:0010977 | negative regulation of neuron projection development                                 | 1.80E-05 | 2.17E-03 | 4.84 (15592,161,220,11)   |
| GO:0060071 | Wnt signaling pathway, planar cell polarity pathway                                  | 1.83E-05 | 2.19E-03 | 14.77 (15592,24,220,5)    |
| GO:0030512 | negative regulation of transforming growth factor beta receptor signaling pathway    | 1.85E-05 | 2.20E-03 | 8.41 (15592,59,220,7)     |
| GO:0043393 | regulation of protein binding                                                        | 1.90E-05 | 2.24E-03 | 4.09 (15592,225,220,13)   |
| GO:0007169 | transmembrane receptor protein tyrosine kinase signaling pathway                     | 1.98E-05 | 2.32E-03 | 3.60 (15592,295,220,15)   |
| GO:0048754 | branching morphogenesis of an epithelial tube                                        | 2.16E-05 | 2.51E-03 | 5.25 (15592,135,220,10)   |
| GO:0051960 | regulation of nervous system development                                             | 2.19E-05 | 2.53E-03 | 2.27 (15592,937,220,30)   |
| GO:0050789 | regulation of biological process                                                     | 2.23E-05 | 2.55E-03 | 1.25 (15592,8652,220,152) |
| GO:0030111 | regulation of Wnt signaling pathway                                                  | 2.27E-05 | 2.58E-03 | 3.77 (15592,263,220,14)   |
| GO:1903845 | negative regulation of cellular response to transforming growth factor beta stimulus | 2.31E-05 | 2.61E-03 | 8.13 (15592,61,220,7)     |
| GO:0009968 | negative regulation of signal transduction                                           | 2.40E-05 | 2.69E-03 | 2.18 (15592,1038,220,32)  |
| GO:0016342 | catenin complex                                                                      | 1.83E-05 | 2.72E-03 | 14.77 (15592,24,220,5)    |
| GO:0050767 | regulation of neurogenesis                                                           | 2.61E-05 | 2.87E-03 | 2.33 (15592,851,220,28)   |
| GO:0030545 | receptor regulator activity                                                          | 7.16E-06 | 2.87E-03 | 3.37 (15592,378,220,18)   |
| GO:0017147 | Wnt-protein binding                                                                  | 8.50E-06 | 2.88E-03 | 12.15 (15592,35,220,6)    |
| GO:0050768 | negative regulation of neurogenesis                                                  | 2.60E-05 | 2.89E-03 | 3.52 (15592,302,220,15)   |
| GO:0003700 | DNA-binding transcription factor activity                                            | 7.86E-06 | 2.89E-03 | 2.49 (15592,797,220,28)   |
| GO:0072298 | regulation of metanephric glomerulus development                                     | 2.71E-05 | 2.97E-03 | 42.52 (15592,5,220,3)     |
| GO:0003002 | regionalization                                                                      | 2.74E-05 | 2.98E-03 | 3.95 (15592,233,220,13)   |
| GO:0000902 | cell morphogenesis                                                                   | 2.87E-05 | 3.09E-03 | 3.94 (15592,234,220,13)   |
| GO:0045668 | negative regulation of osteoblast differentiation                                    | 2.91E-05 | 3.11E-03 | 9.89 (15592,43,220,6)     |
| GO:0045995 | regulation of embryonic development                                                  | 3.16E-05 | 3.36E-03 | 5.64 (15592,113,220,9)    |
| GO:0001657 | ureteric bud development                                                             | 3.32E-05 | 3.51E-03 | 9.66 (15592,44,220,6)     |
| GO:0048018 | receptor ligand activity                                                             | 1.12E-05 | 3.53E-03 | 3.41 (15592,353,220,17)   |
| GO:0045667 | regulation of osteoblast differentiation                                             | 3.38E-05 | 3.55E-03 | 5.60 (15592,114,220,9)    |
| GO:0042325 | regulation of phosphorylation                                                        | 3.44E-05 | 3.58E-03 | 1.98 (15592,1360,220,38)  |
| GO:0090178 | regulation of establishment of planar polarity involved in neural tube closure       | 3.46E-05 | 3.58E-03 | 20.25 (15592,14,220,4)    |
| GO:0050730 | regulation of peptidyl-tyrosine phosphorylation                                      | 3.57E-05 | 3.65E-03 | 3.86 (15592,239,220,13)   |
| GO:0010557 | positive regulation of macromolecule biosynthetic process                            | 3.56E-05 | 3.66E-03 | 1.89 (15592,1572,220,42)  |
| GO:0045165 | cell fate commitment                                                                 | 3.77E-05 | 3.83E-03 | 4.92 (15592,144,220,10)   |
| GO:0048870 | cell motility                                                                        | 4.17E-05 | 4.20E-03 | 2.36 (15592,780,220,26)   |
| GO:0045620 | negative regulation of lymphocyte differentiation                                    | 4.31E-05 | 4.28E-03 | 9.24 (15592,46,220,6)     |
| GO:0051254 | positive regulation of RNA metabolic process                                         | 4.29E-05 | 4.29E-03 | 1.94 (15592,1426,220,39)  |
| GO:0045664 | regulation of neuron differentiation                                                 | 4.41E-05 | 4.35E-03 | 2.46 (15592,691,220,24)   |
| GO:0032963 | collagen metabolic process                                                           | 4.88E-05 | 4.79E-03 | 9.05 (15592,47,220,6)     |
| GO:0045937 | positive regulation of phosphate metabolic process                                   | 5.05E-05 | 4.90E-03 | 2.17 (15592,980,220,30)   |
| GO:0010562 | positive regulation of phosphorus metabolic process                                  | 5.05E-05 | 4.93E-03 | 2.17 (15592,980,220,30)   |
| GO:0048407 | platelet-derived growth factor binding                                               | 1.75E-05 | 5.13E-03 | 23.62 (15592,12,220,4)    |
| GO:0032808 | lacrimal gland development                                                           | 5.37E-05 | 5.17E-03 | 35.44 (15592,6,220,3)     |
| GO:0010811 | positive regulation of cell-substrate adhesion                                       | 5.42E-05 | 5.18E-03 | 5.27 (15592,121,220,9)    |
| GO:0072164 | mesonephric tubule development                                                       | 5.51E-05 | 5.24E-03 | 8.86 (15592,48,220,6)     |
| GO:0098609 | cell-cell adhesion                                                                   | 5.63E-05 | 5.25E-03 | 3.29 (15592,323,220,15)   |
| GO:0016055 | Wnt signaling pathway                                                                | 5.57E-05 | 5.26E-03 | 3.96 (15592,215,220,12)   |
| GO:0048468 | cell development                                                                     | 5.63E-05 | 5.28E-03 | 2.55 (15592,612,220,22)   |
| GO:0034329 | cell junction assembly                                                               | 5.78E-05 | 5.36E-03 | 5.23 (15592,122,220,9)    |
| GO:0045935 | positive regulation of nucleobase-containing compound metabolic process              | 5.84E-05 | 5.39E-03 | 1.85 (15592,1606,220,42)  |
| GO:0061138 | morphogenesis of a branching epithelium                                              | 5.98E-05 | 5.44E-03 | 4.66 (15592,152,220,11)   |
| GO:0010648 | negative regulation of cell communication                                            | 5.96E-05 | 5.46E-03 | 2.06 (15592,1138,220,33)  |
| GO:0051961 | negative regulation of nervous system development                                    | 6.04E-05 | 5.47E-03 | 3.27 (15592,325,220,15)   |
| GO:0072163 | mesonephric epithelium development                                                   | 6.21E-05 | 5.59E-03 | 8.68 (15592,49,220,6)     |
| GO:0017015 | regulation of transforming growth factor beta receptor signaling pathway             | 6.32E-05 | 5.65E-03 | 5.91 (15592,96,220,8)     |
| GO:0023057 | negative regulation of signaling                                                     | 6.49E-05 | 5.77E-03 | 2.05 (15592,1143,220,33)  |
| GO:0060070 | canonical Wnt signaling pathway                                                      | 6.85E-05 | 6.02E-03 | 6.89 (15592,72,220,7)     |
| GO:0040011 | locomotion                                                                           | 6.83E-05 | 6.04E-03 | 2.25 (15592,851,220,27)   |
| GO:0001822 | kidney development                                                                   | 6.98E-05 | 6.10E-03 | 5.10 (15592,125,220,9)    |
| GO:1905114 | cell surface receptor signaling pathway involved in cell-cell signaling              | 7.27E-05 | 6.27E-03 | 3.85 (15592,221,220,12)   |
| GO:0006928 | movement of cell or subcellular component                                            | 7.23E-05 | 6.28E-03 | 2.06 (15592,1099,220,32)  |
| GO:1903844 | regulation of cellular response to transforming growth factor beta stimulus          | 7.32E-05 | 6.29E-03 | 5.79 (15592,98,220,8)     |
| GO:0002009 | morphogenesis of an epithelium                                                       | 7.37E-05 | 6.29E-03 | 3.39 (15592,293,220,14)   |
| GO:0051098 | regulation of binding                                                                | 7.43E-05 | 6.31E-03 | 3.06 (15592,370,220,16)   |
| GO:0045944 | positive regulation of transcription by RNA polymerase II                            | 7.49E-05 | 6.32E-03 | 2.09 (15592,1051,220,31)  |
| GO:0048701 | embryonic cranial skeleton morphogenesis                                             | 7.89E-05 | 6.55E-03 | 11.07 (15592,32,220,5)    |
| GO:0003151 | outflow tract morphogenesis                                                          | 7.81E-05 | 6.56E-03 | 8.34 (15592,51,220,6)     |
| GO:0060351 | cartilage development involved in endochondral bone morphogenesis                    | 7.95E-05 | 6.56E-03 | 16.68 (15592,17,220,4)    |
| GO:0048514 | blood vessel morphogenesis                                                           | 7.87E-05 | 6.57E-03 | 5.73 (15592,99,220,8)     |
| GO:0065009 | regulation of molecular function                                                     | 8.07E-05 | 6.62E-03 | 1.69 (15592,2185,220,52)  |
| GO:0007417 | central nervous system development                                                   | 8.90E-05 | 7.27E-03 | 6.61 (15592,75,220,7)     |
| GO:0001763 | morphogenesis of a branching structure                                               | 9.19E-05 | 7.47E-03 | 4.43 (15592,160,220,10)   |
| GO:0001934 | positive regulation of protein phosphorylation                                       | 9.52E-05 | 7.69E-03 | 2.20 (15592,868,220,27)   |
| GO:0007219 | Notch signaling pathway                                                              | 9.72E-05 | 7.82E-03 | 5.56 (15592,102,220,8)    |
| GO:0045597 | positive regulation of cell differentiation                                          | 9.79E-05 | 7.83E-03 | 2.13 (15592,967,220,29)   |
| GO:0051171 | regulation of nitrogen compound metabolic process                                    | 1.01E-04 | 8.01E-03 | 1.42 (15592,4401,220,88)  |
| GO:1905276 | regulation of epithelial tube formation                                              | 1.01E-04 | 8.04E-03 | 15.75 (15592,18,220,4)    |
| GO:0031323 | regulation of cellular metabolic process                                             | 1.05E-04 | 8.27E-03 | 1.40 (15592,4664,220,92)  |
| GO:0035567 | non-canonical Wnt signaling pathway                                                  | 1.07E-04 | 8.34E-03 | 10.42 (15592,34,220,5)    |
| GO:0042733 | embryonic digit morphogenesis                                                        | 1.08E-04 | 8.43E-03 | 7.87 (15592,54,220,6)     |
| GO:1901342 | regulation of vasculature development                                                | 1.13E-04 | 8.74E-03 | 3.25 (15592,305,220,14)   |
| GO:0051252 | regulation of RNA metabolic process                                                  | 1.16E-04 | 8.88E-03 | 1.59 (15592,2623,220,59)  |
| GO:0007507 | heart development                                                                    | 1.15E-04 | 8.89E-03 | 3.67 (15592,232,220,12)   |
| GO:0031401 | positive regulation of protein modification process                                  | 1.17E-04 | 8.93E-03 | 2.04 (15592,1077,220,31)  |
| GO:0090090 | negative regulation of canonical Wnt signaling pathway                               | 1.27E-04 | 9.54E-03 | 5.35 (15592,106,220,8)    |
| GO:0010629 | negative regulation of gene expression                                               | 1.27E-04 | 9.55E-03 | 1.88 (15592,1393,220,37)  |
| GO:0072215 | regulation of metanephros development                                                | 1.27E-04 | 9.56E-03 | 14.92 (15592,19,220,4)    |
| GO:0070208 | protein heterotrimerization                                                          | 1.27E-04 | 9.61E-03 | 14.92 (15592,19,220,4)    |
| GO:0060828 | regulation of canonical Wnt signaling pathway                                        | 1.30E-04 | 9.65E-03 | 3.90 (15592,200,220,11)   |
| GO:0030241 | skeletal muscle myosin thick filament assembly                                       | 1.47E-04 | 1.08E-02 | 26.58 (15592,8,220,3)     |

|            |                                                                        |          |          |                           |
|------------|------------------------------------------------------------------------|----------|----------|---------------------------|
| GO:0048539 | bone marrow development                                                | 1.47E-04 | 1.08E-02 | 26.58 (15592.8,220.3)     |
| GO:0010812 | negative regulation of cell-substrate adhesion                         | 1.47E-04 | 1.09E-02 | 7.46 (15592.57,220.6)     |
| GO:0071688 | striated muscle myosin thick filament assembly                         | 1.47E-04 | 1.09E-02 | 26.58 (15592.8,220.3)     |
| GO:0097485 | neuron projection guidance                                             | 1.52E-04 | 1.10E-02 | 4.17 (15592.170,220.10)   |
| GO:0065007 | biological regulation                                                  | 1.53E-04 | 1.11E-02 | 1.20 (15592.9126,220.155) |
| GO:1903706 | regulation of hemopoiesis                                              | 1.56E-04 | 1.12E-02 | 3.00 (15592.354,220.15)   |
| GO:0044331 | cell-cell adhesion mediated by cadherin                                | 1.56E-04 | 1.12E-02 | 14.17 (15592.20,220.4)    |
| GO:0031399 | regulation of protein modification process                             | 1.59E-04 | 1.13E-02 | 1.81 (15592.1570,220.40)  |
| GO:0090175 | regulation of establishment of planar polarity                         | 1.61E-04 | 1.14E-02 | 9.58 (15592.37,220.5)     |
| GO:0008083 | growth factor activity                                                 | 4.16E-05 | 1.15E-02 | 5.45 (15592.117,220.9)    |
| GO:0019219 | regulation of nucleobase-containing compound metabolic process         | 1.71E-04 | 1.21E-02 | 1.54 (15592.2899,220.63)  |
| GO:0071495 | cellular response to endogenous stimulus                               | 1.77E-04 | 1.24E-02 | 2.56 (15592.527,220.19)   |
| GO:2000112 | regulation of cellular macromolecule biosynthetic process              | 1.82E-04 | 1.27E-02 | 1.55 (15592.2785,220.61)  |
| GO:0050731 | positive regulation of peptidyl-tyrosine phosphorylation               | 1.84E-04 | 1.27E-02 | 4.07 (15592.174,220.10)   |
| GO:0045892 | negative regulation of transcription, DNA-templated                    | 1.84E-04 | 1.27E-02 | 2.05 (15592.1003,220.29)  |
| GO:0007267 | cell-cell signaling                                                    | 1.83E-04 | 1.28E-02 | 3.28 (15592.281,220.13)   |
| GO:0008347 | glial cell migration                                                   | 1.91E-04 | 1.31E-02 | 13.50 (15592.21,220.4)    |
| GO:0046639 | negative regulation of alpha-beta T cell differentiation               | 1.91E-04 | 1.31E-02 | 13.50 (15592.21,220.4)    |
| GO:0051216 | cartilage development                                                  | 1.97E-04 | 1.33E-02 | 5.84 (15592.85,220.7)     |
| GO:1903507 | negative regulation of nucleic acid-templated transcription            | 1.96E-04 | 1.34E-02 | 2.04 (15592.1007,220.29)  |
| GO:0097156 | fasciculation of motor neuron axon                                     | 1.98E-04 | 1.34E-02 | 70.87 (15592.2,220.2)     |
| GO:1902679 | negative regulation of RNA biosynthetic process                        | 2.00E-04 | 1.34E-02 | 2.04 (15592.1008,220.29)  |
| GO:0002683 | negative regulation of immune system process                           | 2.05E-04 | 1.37E-02 | 2.81 (15592.404,220.16)   |
| GO:0070051 | fibrinogen binding                                                     | 5.37E-05 | 1.39E-02 | 35.44 (15592.6,220.3)     |
| GO:0031033 | myosin filament organization                                           | 2.19E-04 | 1.42E-02 | 23.62 (15592.9,220.3)     |
| GO:0060348 | bone development                                                       | 2.14E-04 | 1.43E-02 | 6.97 (15592.61,220.6)     |
| GO:0001817 | regulation of cytokine production                                      | 2.15E-04 | 1.43E-02 | 2.44 (15592.580,220.20)   |
| GO:0040008 | regulation of growth                                                   | 2.17E-04 | 1.43E-02 | 2.38 (15592.626,220.21)   |
| GO:0045785 | positive regulation of cell adhesion                                   | 2.18E-04 | 1.43E-02 | 2.91 (15592.365,220.15)   |
| GO:0031034 | myosin filament assembly                                               | 2.19E-04 | 1.43E-02 | 23.62 (15592.9,220.3)     |
| GO:1901681 | sulfur compound binding                                                | 5.83E-05 | 1.43E-02 | 3.94 (15592.216,220.12)   |
| GO:0010556 | regulation of macromolecule biosynthetic process                       | 2.26E-04 | 1.47E-02 | 1.53 (15592.2867,220.62)  |
| GO:0007165 | signal transduction                                                    | 2.31E-04 | 1.49E-02 | 1.50 (15592.3112,220.66)  |
| GO:0042327 | positive regulation of phosphorylation                                 | 2.33E-04 | 1.50E-02 | 2.09 (15592.917,220.27)   |
| GO:0046872 | metal ion binding                                                      | 6.48E-05 | 1.50E-02 | 1.56 (15592.3045,220.67)  |
| GO:0007156 | homophilic cell adhesion via plasma membrane adhesion molecules        | 2.44E-04 | 1.56E-02 | 5.64 (15592.88,220.7)     |
| GO:0023052 | signaling                                                              | 2.55E-04 | 1.63E-02 | 3.01 (15592.330,220.14)   |
| GO:0034332 | adherens junction organization                                         | 2.56E-04 | 1.63E-02 | 6.75 (15592.63,220.6)     |
| GO:0043169 | cation binding                                                         | 7.39E-05 | 1.63E-02 | 1.55 (15592.3118,220.68)  |
| GO:0031326 | regulation of cellular biosynthetic process                            | 2.64E-04 | 1.67E-02 | 1.51 (15592.3004,220.64)  |
| GO:0048568 | embryonic organ development                                            | 2.66E-04 | 1.68E-02 | 4.28 (15592.149,220.9)    |
| GO:0033002 | muscle cell proliferation                                              | 2.77E-04 | 1.73E-02 | 12.33 (15592.23,220.4)    |
| GO:0071230 | cellular response to amino acid stimulus                               | 2.79E-04 | 1.74E-02 | 6.64 (15592.64,220.6)     |
| GO:0010975 | regulation of neuron projection development                            | 2.83E-04 | 1.76E-02 | 2.46 (15592.547,220.19)   |
| GO:0080090 | regulation of primary metabolic process                                | 2.89E-04 | 1.79E-02 | 1.38 (15592.4526,220.88)  |
| GO:0004714 | transmembrane receptor protein tyrosine kinase activity                | 8.73E-05 | 1.83E-02 | 8.18 (15592.52,220.6)     |
| GO:0060742 | epithelial cell differentiation involved in prostate gland development | 3.09E-04 | 1.87E-02 | 21.26 (15592.10,220.3)    |
| GO:0010605 | negative regulation of macromolecule metabolic process                 | 3.04E-04 | 1.88E-02 | 1.63 (15592.2128,220.49)  |
| GO:0003149 | membranous septum morphogenesis                                        | 3.09E-04 | 1.88E-02 | 21.26 (15592.10,220.3)    |
| GO:0072216 | positive regulation of metanephros development                         | 3.09E-04 | 1.88E-02 | 21.26 (15592.10,220.3)    |
| GO:0010838 | positive regulation of keratinocyte proliferation                      | 3.09E-04 | 1.89E-02 | 21.26 (15592.10,220.3)    |
| GO:0009952 | anterior/posterior pattern specification                               | 3.09E-04 | 1.90E-02 | 4.20 (15592.152,220.9)    |
| GO:0010771 | negative regulation of cell morphogenesis involved in differentiation  | 3.21E-04 | 1.93E-02 | 5.39 (15592.92,220.7)     |
| GO:0051781 | positive regulation of cell division                                   | 3.31E-04 | 1.98E-02 | 6.44 (15592.66,220.6)     |
| GO:0035108 | limb morphogenesis                                                     | 3.43E-04 | 2.04E-02 | 5.33 (15592.93,220.7)     |
| GO:0035107 | appendage morphogenesis                                                | 3.43E-04 | 2.05E-02 | 5.33 (15592.93,220.7)     |
| GO:0055006 | cardiac cell development                                               | 3.71E-04 | 2.20E-02 | 8.05 (15592.44,220.5)     |
| GO:0000122 | negative regulation of transcription by RNA polymerase II              | 3.87E-04 | 2.28E-02 | 2.18 (15592.749,220.23)   |
| GO:0120163 | negative regulation of cold-induced thermogenesis                      | 4.12E-04 | 2.42E-02 | 7.87 (15592.45,220.5)     |
| GO:0090193 | positive regulation of glomerulus development                          | 4.21E-04 | 2.45E-02 | 19.33 (15592.11,220.3)    |
| GO:0097094 | craniofacial suture morphogenesis                                      | 4.21E-04 | 2.46E-02 | 19.33 (15592.11,220.3)    |
| GO:0120161 | regulation of cold-induced thermogenesis                               | 4.40E-04 | 2.56E-02 | 4.46 (15592.127,220.8)    |
| GO:0000981 | DNA-binding transcription factor activity, RNA polymerase II-specific  | 1.39E-04 | 2.79E-02 | 2.46 (15592.606,220.21)   |
| GO:0009889 | regulation of biosynthetic process                                     | 4.83E-04 | 2.80E-02 | 1.48 (15592.3069,220.64)  |
| GO:0022408 | negative regulation of cell-cell adhesion                              | 4.93E-04 | 2.84E-02 | 3.94 (15592.162,220.9)    |
| GO:0048638 | regulation of developmental growth                                     | 5.03E-04 | 2.89E-02 | 2.81 (15592.353,220.14)   |
| GO:0010769 | regulation of cell morphogenesis involved in differentiation           | 5.17E-04 | 2.96E-02 | 2.94 (15592.313,220.13)   |
| GO:0048762 | mesenchymal cell differentiation                                       | 5.30E-04 | 3.01E-02 | 5.91 (15592.72,220.6)     |
| GO:0045765 | regulation of angiogenesis                                             | 5.30E-04 | 3.02E-02 | 3.10 (15592.274,220.12)   |
| GO:0001501 | skeletal system development                                            | 5.41E-04 | 3.06E-02 | 4.33 (15592.131,220.8)    |
| GO:0051128 | regulation of cellular component organization                          | 5.48E-04 | 3.09E-02 | 1.57 (15592.2300,220.51)  |
| GO:0030240 | skeletal muscle thin filament assembly                                 | 5.55E-04 | 3.12E-02 | 17.72 (15592.12,220.3)    |
| GO:0032879 | regulation of localization                                             | 5.61E-04 | 3.14E-02 | 1.54 (15592.2480,220.54)  |
| GO:0072091 | regulation of stem cell proliferation                                  | 5.71E-04 | 3.18E-02 | 5.83 (15592.73,220.6)     |
| GO:0060672 | epithelial cell morphogenesis involved in placental branching          | 5.89E-04 | 3.23E-02 | 47.25 (15592.3,220.2)     |
| GO:0097155 | fasciculation of sensory neuron axon                                   | 5.89E-04 | 3.24E-02 | 47.25 (15592.3,220.2)     |
| GO:0061144 | alveolar secondary septum development                                  | 5.89E-04 | 3.25E-02 | 47.25 (15592.3,220.2)     |
| GO:0003219 | cardiac right ventricle formation                                      | 5.89E-04 | 3.26E-02 | 47.25 (15592.3,220.2)     |
| GO:0034330 | cell junction organization                                             | 5.88E-04 | 3.27E-02 | 3.84 (15592.166,220.9)    |
| GO:0030856 | regulation of epithelial cell differentiation                          | 5.99E-04 | 3.27E-02 | 4.26 (15592.133,220.8)    |
| GO:0003208 | cardiac ventricle morphogenesis                                        | 6.05E-04 | 3.29E-02 | 10.12 (15592.28,220.4)    |
| GO:0050794 | regulation of cellular process                                         | 6.08E-04 | 3.30E-02 | 1.21 (15592.8140,220.139) |
| GO:0048584 | positive regulation of response to stimulus                            | 6.14E-04 | 3.30E-02 | 1.66 (15592.1790,220.42)  |
| GO:0007411 | axon guidance                                                          | 6.14E-04 | 3.31E-02 | 3.82 (15592.167,220.9)    |
| GO:0051129 | negative regulation of cellular component organization                 | 6.48E-04 | 3.47E-02 | 2.19 (15592.680,220.21)   |
| GO:0005518 | collagen binding                                                       | 2.14E-04 | 3.63E-02 | 6.97 (15592.61,220.6)     |
| GO:0051253 | negative regulation of RNA metabolic process                           | 6.97E-04 | 3.71E-02 | 1.89 (15592.1088,220.29)  |
| GO:0090171 | chondrocyte morphogenesis                                              | 7.14E-04 | 3.71E-02 | 16.36 (15592.13,220.3)    |
| GO:0051172 | negative regulation of nitrogen compound metabolic process             | 6.96E-04 | 3.72E-02 | 1.62 (15592.1973,220.45)  |
| GO:0003429 | growth plate cartilage chondrocyte morphogenesis                       | 7.14E-04 | 3.72E-02 | 16.36 (15592.13,220.3)    |
| GO:0005178 | integrin binding                                                       | 2.11E-04 | 3.72E-02 | 4.97 (15592.114,220.8)    |
| GO:0003422 | growth plate cartilage morphogenesis                                   | 7.14E-04 | 3.73E-02 | 16.36 (15592.13,220.3)    |
| GO:0043200 | response to amino acid                                                 | 7.08E-04 | 3.75E-02 | 5.60 (15592.76,220.6)     |

|            |                                                                                    |          |          |                           |
|------------|------------------------------------------------------------------------------------|----------|----------|---------------------------|
| GO:0003414 | chondrocyte morphogenesis involved in endochondral bone morphogenesis              | 7.14E-04 | 3.75E-02 | 16.36 (15592,13,220,3)    |
| GO:0061418 | regulation of transcription from RNA polymerase II promoter in response to hypoxia | 7.14E-04 | 3.76E-02 | 16.36 (15592,13,220,3)    |
| GO:0005515 | protein binding                                                                    | 2.05E-04 | 3.76E-02 | 1.25 (15592,7551,220,133) |
| GO:2000647 | negative regulation of stem cell proliferation                                     | 7.14E-04 | 3.77E-02 | 16.36 (15592,13,220,3)    |
| GO:0051302 | regulation of cell division                                                        | 7.28E-04 | 3.77E-02 | 4.14 (15592,137,220,8)    |
| GO:0030617 | transforming growth factor beta receptor, inhibitory cytoplasmic mediator activity | 1.98E-04 | 3.80E-02 | 70.87 (15592,2,220,2)     |
| GO:0090183 | regulation of kidney development                                                   | 7.40E-04 | 3.82E-02 | 6.95 (15592,51,220,5)     |
| GO:0018108 | peptidyl-tyrosine phosphorylation                                                  | 8.13E-04 | 4.16E-02 | 5.45 (15592,78,220,6)     |
| GO:0001525 | angiogenesis                                                                       | 8.11E-04 | 4.17E-02 | 3.14 (15592,248,220,11)   |
| GO:0005911 | cell-cell junction                                                                 | 3.24E-04 | 4.18E-02 | 2.69 (15592,421,220,16)   |
| GO:0032270 | positive regulation of cellular protein metabolic process                          | 8.31E-04 | 4.24E-02 | 1.76 (15592,1369,220,34)  |
| GO:0001527 | microfibril                                                                        | 3.09E-04 | 4.27E-02 | 21.26 (15592,10,220,3)    |
| GO:0010558 | negative regulation of macromolecule biosynthetic process                          | 8.71E-04 | 4.43E-02 | 1.82 (15592,1210,220,31)  |
| GO:0000904 | cell morphogenesis involved in differentiation                                     | 8.79E-04 | 4.46E-02 | 4.02 (15592,141,220,8)    |
| GO:0008045 | motor neuron axon guidance                                                         | 9.00E-04 | 4.52E-02 | 9.14 (15592,31,220,4)     |
| GO:1902692 | regulation of neuroblast proliferation                                             | 9.00E-04 | 4.53E-02 | 9.14 (15592,31,220,4)     |
| GO:0048739 | cardiac muscle fiber development                                                   | 8.99E-04 | 4.54E-02 | 15.19 (15592,14,220,3)    |
| GO:0120035 | regulation of plasma membrane bounded cell projection organization                 | 9.20E-04 | 4.61E-02 | 2.13 (15592,699,220,21)   |
| GO:0007043 | cell-cell junction assembly                                                        | 9.29E-04 | 4.62E-02 | 5.32 (15592,80,220,6)     |
| GO:0014910 | regulation of smooth muscle cell migration                                         | 9.29E-04 | 4.63E-02 | 5.32 (15592,80,220,6)     |
| GO:0009892 | negative regulation of metabolic process                                           | 9.55E-04 | 4.73E-02 | 1.53 (15592,2356,220,51)  |
| GO:0001837 | epithelial to mesenchymal transition                                               | 9.63E-04 | 4.74E-02 | 6.56 (15592,54,220,5)     |
| GO:0050679 | positive regulation of epithelial cell proliferation                               | 9.68E-04 | 4.75E-02 | 3.58 (15592,178,220,9)    |
| GO:0051147 | regulation of muscle cell differentiation                                          | 9.63E-04 | 4.76E-02 | 3.96 (15592,143,220,8)    |
| GO:0018212 | peptidyl-tyrosine modification                                                     | 9.92E-04 | 4.85E-02 | 5.25 (15592,81,220,6)     |

#### 4 week old NOD vs. NOD.B10 islets: GO terms associated with differentially changed genes (FDR q-value < 0.05)

\*No GO terms associated with genes downregulated by ≥3-fold

#### 4 week old NOD islets: GO terms associated with genes upregulated by ≥3-fold

| GO term    | Description                                  | P-value  | FDR q-value | Enrichment (N, B, n, b)* |
|------------|----------------------------------------------|----------|-------------|--------------------------|
| GO:0007186 | G protein-coupled receptor signaling pathway | 4.32E-12 | 3.26E-08    | 3.77 (15592,780,191,36)  |
| GO:0050877 | nervous system process                       | 7.35E-12 | 3.70E-08    | 3.37 (15592,968,191,40)  |
| GO:0003008 | system process                               | 3.75E-12 | 5.67E-08    | 2.97 (15592,1320,191,48) |
| GO:0004984 | olfactory receptor activity                  | 8.14E-10 | 3.59E-06    | 5.44 (15592,300,191,20)  |
| GO:0007600 | sensory perception                           | 2.05E-09 | 7.73E-06    | 3.70 (15592,617,191,28)  |
| GO:0007608 | sensory perception of smell                  | 2.78E-09 | 8.40E-06    | 5.07 (15592,322,191,20)  |
| GO:0004888 | transmembrane signaling receptor activity    | 4.77E-09 | 1.05E-05    | 3.12 (15592,863,191,33)  |
| GO:0031224 | intrinsic component of membrane              | 1.51E-08 | 2.92E-05    | 1.73 (15592,3958,191,84) |
| GO:0007606 | sensory perception of chemical stimulus      | 1.33E-08 | 3.34E-05    | 4.63 (15592,353,191,20)  |
| GO:0016021 | integral component of membrane               | 3.49E-08 | 3.38E-05    | 1.73 (15592,3818,191,81) |
| GO:0038023 | signaling receptor activity                  | 1.59E-07 | 2.33E-04    | 2.70 (15592,999,191,33)  |
| GO:0060089 | molecular transducer activity                | 4.35E-07 | 4.79E-04    | 2.58 (15592,1044,191,33) |
| GO:1902475 | L-alpha-amino acid transmembrane transport   | 5.86E-07 | 1.27E-03    | 18.84 (15592,26,191,6)   |
| GO:0089718 | amino acid import across plasma membrane     | 7.12E-07 | 1.34E-03    | 27.21 (15592,15,191,5)   |
| GO:0043090 | amino acid import                            | 1.02E-06 | 1.55E-03    | 25.51 (15592,16,191,5)   |
| GO:0032501 | multicellular organismal process             | 9.70E-07 | 1.63E-03    | 1.74 (15592,3142,191,67) |
| GO:0044425 | membrane part                                | 6.33E-06 | 4.08E-03    | 1.47 (15592,5108,191,92) |
| GO:0098739 | import across plasma membrane                | 4.05E-06 | 5.57E-03    | 8.59 (15592,76,191,8)    |
| GO:0005044 | scavenger receptor activity                  | 7.28E-06 | 6.42E-03    | 12.56 (15592,39,191,6)   |
| GO:0015807 | L-amino acid transport                       | 1.50E-05 | 1.74E-02    | 11.13 (15592,44,191,6)   |
| GO:0007610 | behavior                                     | 1.41E-05 | 1.77E-02    | 2.97 (15592,550,191,20)  |
| GO:0038024 | cargo receptor activity                      | 3.64E-05 | 2.68E-02    | 7.62 (15592,75,191,7)    |
| GO:0015813 | L-glutamate transmembrane transport          | 2.68E-05 | 2.89E-02    | 21.77 (15592,15,191,4)   |
| GO:0006855 | drug transmembrane transport                 | 3.17E-05 | 3.19E-02    | 9.80 (15592,50,191,6)    |
| GO:1905039 | carboxylic acid transmembrane transport      | 5.11E-05 | 4.29E-02    | 7.23 (15592,79,191,7)    |
| GO:0044297 | cell body                                    | 8.89E-05 | 4.30E-02    | 2.60 (15592,627,191,20)  |
| GO:0005576 | extracellular region                         | 1.11E-04 | 4.30E-02    | 2.04 (15592,1243,191,31) |
| GO:1903825 | organic acid transmembrane transport         | 5.11E-05 | 4.54E-02    | 7.23 (15592,79,191,7)    |
| GO:1901607 | alpha-amino acid biosynthetic process        | 4.95E-05 | 4.67E-02    | 9.07 (15592,54,191,6)    |
| GO:0003333 | amino acid transmembrane transport           | 6.10E-05 | 4.85E-02    | 8.75 (15592,56,191,6)    |

#### 12 week old NOD vs. NOD.B10 islets: GO terms associated with differentially changed genes (FDR q-value < 0.05)

#### 12 week old NOD islets: GO terms associated with genes upregulated by ≥3-fold

| GO term    | Description                                                        | P-value  | FDR q-value | Enrichment (N, B, n, b)*  |
|------------|--------------------------------------------------------------------|----------|-------------|---------------------------|
| GO:0002376 | immune system process                                              | 2.36E-75 | 3.56E-71    | 3.76 (15592,1185,794,227) |
| GO:0002682 | regulation of immune system process                                | 2.98E-52 | 2.26E-48    | 3.31 (15592,1114,794,188) |
| GO:0006955 | immune response                                                    | 2.81E-46 | 1.42E-42    | 4.08 (15592,635,794,132)  |
| GO:0002684 | positive regulation of immune system process                       | 7.80E-46 | 2.95E-42    | 3.81 (15592,726,794,141)  |
| GO:0045321 | leukocyte activation                                               | 1.41E-44 | 4.27E-41    | 5.02 (15592,403,794,103)  |
| GO:0002250 | adaptive immune response                                           | 2.22E-41 | 5.59E-38    | 7.38 (15592,181,794,68)   |
| GO:0050776 | regulation of immune response                                      | 2.91E-41 | 6.28E-38    | 3.93 (15592,614,794,123)  |
| GO:0001775 | cell activation                                                    | 1.34E-39 | 2.54E-36    | 4.46 (15592,453,794,103)  |
| GO:0002694 | regulation of leukocyte activation                                 | 6.69E-39 | 1.12E-35    | 4.43 (15592,452,794,102)  |
| GO:0050865 | regulation of cell activation                                      | 8.37E-38 | 1.27E-34    | 4.20 (15592,491,794,105)  |
| GO:0051249 | regulation of lymphocyte activation                                | 3.58E-37 | 4.92E-34    | 4.79 (15592,369,794,90)   |
| GO:0046649 | lymphocyte activation                                              | 5.32E-36 | 6.71E-33    | 5.03 (15592,324,794,83)   |
| GO:0050778 | positive regulation of immune response                             | 1.36E-35 | 1.58E-32    | 4.36 (15592,428,794,95)   |
| GO:0050870 | positive regulation of T cell activation                           | 5.74E-29 | 6.19E-26    | 6.42 (15592,162,794,53)   |
| GO:0051251 | positive regulation of lymphocyte activation                       | 2.13E-28 | 2.15E-25    | 5.29 (15592,230,794,62)   |
| GO:0050863 | regulation of T cell activation                                    | 3.50E-28 | 3.31E-25    | 4.93 (15592,263,794,66)   |
| GO:0002429 | immune response-activating cell surface receptor signaling pathway | 3.77E-28 | 3.35E-25    | 7.97 (15592,106,794,43)   |
| GO:0050851 | antigen receptor-mediated signaling pathway                        | 6.59E-28 | 5.25E-25    | 8.63 (15592,91,794,40)    |
| GO:1903039 | positive regulation of leukocyte cell-cell adhesion                | 6.41E-28 | 5.38E-25    | 6.03 (15592,176,794,54)   |
| GO:0002768 | immune response-regulating cell surface receptor signaling pathway | 1.67E-27 | 1.27E-24    | 7.51 (15592,115,794,44)   |
| GO:0002696 | positive regulation of leukocyte activation                        | 5.75E-27 | 4.14E-24    | 4.71 (15592,275,794,66)   |
| GO:0050867 | positive regulation of cell activation                             | 2.02E-26 | 1.39E-23    | 4.55 (15592,289,794,67)   |
| GO:0002253 | activation of immune response                                      | 3.09E-26 | 2.03E-23    | 5.30 (15592,211,794,57)   |
| GO:0050670 | regulation of lymphocyte proliferation                             | 3.24E-26 | 2.04E-23    | 5.61 (15592,189,794,54)   |
| GO:0002521 | leukocyte differentiation                                          | 3.63E-26 | 2.19E-23    | 4.64 (15592,275,794,65)   |

|            |                                                                                                         |          |          |                           |
|------------|---------------------------------------------------------------------------------------------------------|----------|----------|---------------------------|
| GO:0032944 | regulation of mononuclear cell proliferation                                                            | 5.73E-26 | 3.33E-23 | 5.55 (15592,191,794,54)   |
| GO:0098552 | side of membrane                                                                                        | 1.76E-26 | 3.41E-23 | 4.07 (15592,367,794,76)   |
| GO:0070663 | regulation of leukocyte proliferation                                                                   | 9.02E-26 | 5.05E-23 | 5.40 (15592,200,794,55)   |
| GO:1903037 | regulation of leukocyte cell-cell adhesion                                                              | 1.04E-25 | 5.43E-23 | 4.85 (15592,247,794,61)   |
| GO:0022409 | positive regulation of cell-cell adhesion                                                               | 1.03E-25 | 5.57E-23 | 5.29 (15592,208,794,56)   |
| GO:0009897 | external side of plasma membrane                                                                        | 2.50E-25 | 2.42E-22 | 4.37 (15592,301,794,67)   |
| GO:0002764 | immune response-regulating signaling pathway                                                            | 2.48E-24 | 1.25E-21 | 5.73 (15592,168,794,49)   |
| GO:0050864 | regulation of B cell activation                                                                         | 5.61E-24 | 2.73E-21 | 6.88 (15592,117,794,41)   |
| GO:0048584 | positive regulation of response to stimulus                                                             | 7.64E-24 | 3.61E-21 | 2.07 (15592,1790,794,189) |
| GO:0002757 | immune response-activating signal transduction                                                          | 8.56E-24 | 3.92E-21 | 5.84 (15592,158,794,47)   |
| GO:0006952 | defense response                                                                                        | 1.33E-23 | 5.89E-21 | 2.79 (15592,781,794,111)  |
| GO:0050896 | response to stimulus                                                                                    | 3.01E-23 | 1.30E-20 | 1.62 (15592,3912,794,323) |
| GO:0048583 | regulation of response to stimulus                                                                      | 1.04E-22 | 4.35E-20 | 1.71 (15592,3193,794,278) |
| GO:0042110 | T cell activation                                                                                       | 1.15E-22 | 4.57E-20 | 5.08 (15592,197,794,51)   |
| GO:0030098 | lymphocyte differentiation                                                                              | 1.15E-22 | 4.70E-20 | 5.08 (15592,197,794,51)   |
| GO:0050671 | positive regulation of lymphocyte proliferation                                                         | 1.37E-22 | 5.32E-20 | 6.78 (15592,113,794,39)   |
| GO:0070665 | positive regulation of leukocyte proliferation                                                          | 1.73E-22 | 6.54E-20 | 6.55 (15592,120,794,40)   |
| GO:0032946 | positive regulation of mononuclear cell proliferation                                                   | 2.87E-22 | 1.06E-19 | 6.66 (15592,115,794,39)   |
| GO:0002252 | immune effector process                                                                                 | 1.28E-21 | 4.59E-19 | 3.74 (15592,357,794,68)   |
| GO:0022407 | regulation of cell-cell adhesion                                                                        | 3.44E-21 | 1.21E-18 | 3.77 (15592,344,794,66)   |
| GO:0002697 | regulation of immune effector process                                                                   | 7.23E-21 | 2.48E-18 | 3.77 (15592,339,794,65)   |
| GO:0042102 | positive regulation of T cell proliferation                                                             | 7.65E-21 | 2.57E-18 | 7.76 (15592,81,794,32)    |
| GO:0001817 | regulation of cytokine production                                                                       | 4.03E-20 | 1.32E-17 | 2.95 (15592,580,794,87)   |
| GO:0050853 | B cell receptor signaling pathway                                                                       | 1.08E-19 | 3.46E-17 | 12.50 (15592,33,794,21)   |
| GO:0001819 | positive regulation of cytokine production                                                              | 3.11E-19 | 9.79E-17 | 3.47 (15592,373,794,66)   |
| GO:0045785 | positive regulation of cell adhesion                                                                    | 4.16E-19 | 1.28E-16 | 3.50 (15592,365,794,65)   |
| GO:0042129 | regulation of T cell proliferation                                                                      | 7.83E-19 | 2.37E-16 | 5.47 (15592,140,794,39)   |
| GO:1902105 | regulation of leukocyte differentiation                                                                 | 1.14E-18 | 3.39E-16 | 4.05 (15592,257,794,53)   |
| GO:0002703 | regulation of leukocyte mediated immunity                                                               | 1.32E-18 | 3.84E-16 | 4.59 (15592,197,794,46)   |
| GO:0002699 | positive regulation of immune effector process                                                          | 4.03E-17 | 1.15E-14 | 4.31 (15592,205,794,45)   |
| GO:0045619 | regulation of lymphocyte differentiation                                                                | 6.00E-17 | 1.68E-14 | 4.88 (15592,157,794,39)   |
| GO:0043207 | response to external biotic stimulus                                                                    | 8.39E-17 | 2.30E-14 | 2.62 (15592,653,794,87)   |
| GO:0009607 | response to biotic stimulus                                                                             | 2.33E-16 | 6.29E-14 | 2.56 (15592,676,794,88)   |
| GO:0002819 | regulation of adaptive immune response                                                                  | 2.98E-16 | 7.90E-14 | 4.67 (15592,164,794,39)   |
| GO:1903706 | regulation of hemopoiesis                                                                               | 4.70E-16 | 1.20E-13 | 3.27 (15592,354,794,59)   |
| GO:0050852 | T cell receptor signaling pathway                                                                       | 4.68E-16 | 1.22E-13 | 7.44 (15592,66,794,25)    |
| GO:0030155 | regulation of cell adhesion                                                                             | 6.69E-16 | 1.68E-13 | 2.62 (15592,615,794,82)   |
| GO:0042113 | B cell activation                                                                                       | 1.46E-15 | 3.62E-13 | 5.10 (15592,131,794,34)   |
| GO:0002706 | regulation of lymphocyte mediated immunity                                                              | 1.56E-15 | 3.80E-13 | 4.81 (15592,147,794,36)   |
| GO:0030217 | T cell differentiation                                                                                  | 1.96E-15 | 4.70E-13 | 5.37 (15592,117,794,32)   |
| GO:0031347 | regulation of defense response                                                                          | 3.05E-15 | 7.19E-13 | 2.71 (15592,536,794,74)   |
| GO:0030888 | regulation of B cell proliferation                                                                      | 3.35E-15 | 7.80E-13 | 7.66 (15592,59,794,23)    |
| GO:0007166 | cell surface receptor signaling pathway                                                                 | 7.79E-15 | 1.78E-12 | 1.99 (15592,1294,794,131) |
| GO:0048518 | positive regulation of biological process                                                               | 8.07E-15 | 1.82E-12 | 1.40 (15592,5036,794,358) |
| GO:0006950 | response to stress                                                                                      | 1.01E-14 | 2.25E-12 | 1.69 (15592,2261,794,195) |
| GO:0046651 | lymphocyte proliferation                                                                                | 1.06E-14 | 2.32E-12 | 6.63 (15592,74,794,25)    |
| GO:0032943 | mononuclear cell proliferation                                                                          | 1.51E-14 | 3.27E-12 | 6.55 (15592,75,794,25)    |
| GO:0002822 | regulation of adaptive immune response based on somatic recombination of immune receptors               | 1.88E-14 | 3.96E-12 | 4.58 (15592,150,794,35)   |
| GO:0046634 | regulation of alpha-beta T cell activation                                                              | 1.88E-14 | 4.01E-12 | 5.96 (15592,89,794,27)    |
| GO:1902107 | positive regulation of leukocyte differentiation                                                        | 1.97E-14 | 4.09E-12 | 4.70 (15592,142,794,34)   |
| GO:0002366 | leukocyte activation involved in immune response                                                        | 4.95E-14 | 1.01E-11 | 4.99 (15592,122,794,31)   |
| GO:0045087 | innate immune response                                                                                  | 5.68E-14 | 1.15E-11 | 3.17 (15592,328,794,53)   |
| GO:0070661 | leukocyte proliferation                                                                                 | 6.31E-14 | 1.24E-11 | 5.94 (15592,86,794,26)    |
| GO:0032649 | regulation of interferon-gamma production                                                               | 6.31E-14 | 1.25E-11 | 5.94 (15592,86,794,26)    |
| GO:0045058 | T cell selection                                                                                        | 6.43E-14 | 1.25E-11 | 10.83 (15592,29,794,16)   |
| GO:0002478 | antigen processing and presentation of exogenous peptide antigen                                        | 7.16E-14 | 1.37E-11 | 11.78 (15592,25,794,15)   |
| GO:0046635 | positive regulation of alpha-beta T cell activation                                                     | 8.99E-14 | 1.70E-11 | 7.08 (15592,61,794,22)    |
| GO:0051707 | response to other organism                                                                              | 1.11E-13 | 2.07E-11 | 2.66 (15592,502,794,68)   |
| GO:0002263 | cell activation involved in immune response                                                             | 1.28E-13 | 2.36E-11 | 4.83 (15592,126,794,31)   |
| GO:0050789 | regulation of biological process                                                                        | 1.72E-13 | 3.12E-11 | 1.22 (15592,8652,794,539) |
| GO:0002821 | positive regulation of adaptive immune response                                                         | 1.93E-13 | 3.47E-11 | 5.08 (15592,112,794,29)   |
| GO:0002683 | negative regulation of immune system process                                                            | 1.98E-13 | 3.53E-11 | 2.87 (15592,404,794,59)   |
| GO:0002824 | positive regulation of adaptive immune response based on somatic recombination of immune receptors      | 2.27E-13 | 3.98E-11 | 5.24 (15592,105,794,28)   |
| GO:0045580 | regulation of T cell differentiation                                                                    | 2.54E-13 | 4.41E-11 | 4.72 (15592,129,794,31)   |
| GO:0019882 | antigen processing and presentation                                                                     | 4.82E-13 | 8.28E-11 | 6.27 (15592,72,794,23)    |
| GO:0042127 | regulation of cell proliferation                                                                        | 4.98E-13 | 8.46E-11 | 1.86 (15592,1426,794,135) |
| GO:0032729 | positive regulation of interferon-gamma production                                                      | 6.55E-13 | 1.10E-10 | 6.87 (15592,60,794,21)    |
| GO:0045582 | positive regulation of T cell differentiation                                                           | 7.07E-13 | 1.17E-10 | 5.89 (15592,80,794,24)    |
| GO:0002708 | positive regulation of lymphocyte mediated immunity                                                     | 7.39E-13 | 1.21E-10 | 5.20 (15592,102,794,27)   |
| GO:1903708 | positive regulation of hemopoiesis                                                                      | 9.70E-13 | 1.58E-10 | 3.95 (15592,179,794,36)   |
| GO:0002695 | negative regulation of leukocyte activation                                                             | 1.13E-12 | 1.81E-10 | 4.24 (15592,153,794,33)   |
| GO:0002460 | adaptive immune response based on somatic recomb. of immune receptors built from Ig superfamily domains | 1.62E-12 | 2.58E-10 | 6.26 (15592,69,794,22)    |
| GO:0019886 | antigen processing and presentation of exogenous peptide antigen via MHC class II                       | 1.77E-12 | 2.78E-10 | 15.43 (15592,14,794,11)   |
| GO:0080134 | regulation of response to stress                                                                        | 2.21E-12 | 3.44E-10 | 1.94 (15592,1163,794,115) |
| GO:0019884 | antigen processing and presentation of exogenous antigen                                                | 2.67E-12 | 4.12E-10 | 9.82 (15592,30,794,15)    |
| GO:0045621 | positive regulation of lymphocyte differentiation                                                       | 2.77E-12 | 4.23E-10 | 5.34 (15592,92,794,25)    |
| GO:0002705 | positive regulation of leukocyte mediated immunity                                                      | 2.91E-12 | 4.40E-10 | 4.46 (15592,132,794,30)   |
| GO:0050900 | leukocyte migration                                                                                     | 4.18E-12 | 6.26E-10 | 4.05 (15592,160,794,33)   |
| GO:0045061 | thymic T cell selection                                                                                 | 4.57E-12 | 6.77E-10 | 11.60 (15592,22,794,13)   |
| GO:0044459 | plasma membrane part                                                                                    | 1.15E-12 | 7.41E-10 | 1.66 (15592,2133,794,180) |
| GO:0050871 | positive regulation of B cell activation                                                                | 5.82E-12 | 8.54E-10 | 5.92 (15592,73,794,22)    |
| GO:0005515 | protein binding                                                                                         | 2.37E-13 | 1.05E-09 | 1.26 (15592,7551,794,484) |
| GO:0042613 | MHC class II protein complex                                                                            | 2.21E-12 | 1.07E-09 | 19.64 (15592,9,794,9)     |
| GO:0050866 | negative regulation of cell activation                                                                  | 9.75E-12 | 1.42E-09 | 3.84 (15592,174,794,34)   |
| GO:0009605 | response to external stimulus                                                                           | 1.12E-11 | 1.61E-09 | 1.94 (15592,1106,794,109) |
| GO:0032101 | regulation of response to external stimulus                                                             | 1.49E-11 | 2.13E-09 | 2.25 (15592,672,794,77)   |
| GO:0007049 | cell cycle                                                                                              | 1.85E-11 | 2.61E-09 | 2.23 (15592,688,794,78)   |
| GO:0002495 | antigen processing and presentation of peptide antigen via MHC class II                                 | 1.93E-11 | 2.67E-09 | 13.50 (15592,16,794,11)   |
| GO:0002504 | antigen processing and presentation of peptide or polysaccharide antigen via MHC class II               | 1.93E-11 | 2.70E-09 | 13.50 (15592,16,794,11)   |
| GO:0009986 | cell surface                                                                                            | 7.74E-12 | 3.00E-09 | 2.39 (15592,574,794,70)   |
| GO:0008284 | positive regulation of cell proliferation                                                               | 2.49E-11 | 3.42E-09 | 2.09 (15592,826,794,88)   |
| GO:0048002 | antigen processing and presentation of peptide antigen                                                  | 2.53E-11 | 3.44E-09 | 7.42 (15592,45,794,17)    |
| GO:0022402 | cell cycle process                                                                                      | 3.08E-11 | 4.16E-09 | 2.22 (15592,682,794,77)   |

|            |                                                                     |          |          |                            |
|------------|---------------------------------------------------------------------|----------|----------|----------------------------|
| GO:0009617 | response to bacterium                                               | 3.98E-11 | 5.33E-09 | 2.99 (15592,296,794,45)    |
| GO:0002274 | myeloid leukocyte activation                                        | 4.16E-11 | 5.52E-09 | 4.77 (15592,103,794,25)    |
| GO:0045577 | regulation of B cell differentiation                                | 4.78E-11 | 6.29E-09 | 9.16 (15592,30,794,14)     |
| GO:0051250 | negative regulation of lymphocyte activation                        | 6.06E-11 | 7.90E-09 | 4.23 (15592,130,794,28)    |
| GO:0002449 | lymphocyte mediated immunity                                        | 8.56E-11 | 1.11E-08 | 6.12 (15592,61,794,19)     |
| GO:0002443 | leukocyte mediated immunity                                         | 1.10E-10 | 1.41E-08 | 5.43 (15592,76,794,21)     |
| GO:0065007 | biological regulation                                               | 1.58E-10 | 2.00E-08 | 1.18 (15592,9126,794,549)  |
| GO:0042330 | taxis                                                               | 1.66E-10 | 2.09E-08 | 3.09 (15592,254,794,40)    |
| GO:0048522 | positive regulation of cellular process                             | 2.67E-10 | 3.33E-08 | 1.35 (15592,4519,794,310)  |
| GO:0031343 | positive regulation of cell killing                                 | 2.93E-10 | 3.63E-08 | 5.74 (15592,65,794,19)     |
| GO:1903047 | mitotic cell cycle process                                          | 3.37E-10 | 4.14E-08 | 2.54 (15592,409,794,53)    |
| GO:0050794 | regulation of cellular process                                      | 3.54E-10 | 4.31E-08 | 1.20 (15592,8140,794,499)  |
| GO:0002260 | lymphocyte homeostasis                                              | 3.59E-10 | 4.34E-08 | 6.42 (15592,52,794,17)     |
| GO:0006935 | chemotaxis                                                          | 4.23E-10 | 5.08E-08 | 3.05 (15592,251,794,39)    |
| GO:0001776 | leukocyte homeostasis                                               | 5.21E-10 | 6.11E-08 | 5.57 (15592,67,794,19)     |
| GO:0030183 | B cell differentiation                                              | 5.18E-10 | 6.12E-08 | 5.03 (15592,82,794,21)     |
| GO:0051240 | positive regulation of multicellular organismal process             | 5.15E-10 | 6.13E-08 | 1.67 (15592,1635,794,139)  |
| GO:0031341 | regulation of cell killing                                          | 8.35E-10 | 9.71E-08 | 4.70 (15592,92,794,22)     |
| GO:0004715 | non-membrane spanning protein tyrosine kinase activity              | 5.48E-11 | 1.21E-07 | 7.66 (15592,41,794,16)     |
| GO:0018108 | peptidyl-tyrosine phosphorylation                                   | 1.31E-09 | 1.51E-07 | 5.04 (15592,78,794,20)     |
| GO:0060326 | cell chemotaxis                                                     | 1.37E-09 | 1.56E-07 | 3.53 (15592,167,794,30)    |
| GO:0042611 | MHC protein complex                                                 | 6.14E-10 | 1.98E-07 | 10.80 (15592,20,794,11)    |
| GO:0050869 | negative regulation of B cell activation                            | 1.98E-09 | 2.25E-07 | 7.98 (15592,32,794,13)     |
| GO:0007159 | leukocyte cell-cell adhesion                                        | 2.03E-09 | 2.29E-07 | 6.69 (15592,44,794,15)     |
| GO:0018212 | peptidyl-tyrosine modification                                      | 2.68E-09 | 3.00E-07 | 4.85 (15592,81,794,20)     |
| GO:0002685 | regulation of leukocyte migration                                   | 3.21E-09 | 3.57E-07 | 3.33 (15592,183,794,31)    |
| GO:0050715 | positive regulation of cytokine secretion                           | 3.30E-09 | 3.61E-07 | 3.93 (15592,125,794,25)    |
| GO:0002700 | regulation of production of molecular mediator of immune response   | 3.30E-09 | 3.64E-07 | 3.93 (15592,125,794,25)    |
| GO:0043368 | positive T cell selection                                           | 3.50E-09 | 3.78E-07 | 12.62 (15592,14,794,9)     |
| GO:0043383 | negative T cell selection                                           | 3.50E-09 | 3.81E-07 | 12.62 (15592,14,794,9)     |
| GO:0007165 | signal transduction                                                 | 3.80E-09 | 4.04E-07 | 1.42 (15592,3112,794,225)  |
| GO:0098542 | defense response to other organism                                  | 3.79E-09 | 4.06E-07 | 2.63 (15592,328,794,44)    |
| GO:0050727 | regulation of inflammatory response                                 | 3.93E-09 | 4.15E-07 | 2.70 (15592,305,794,42)    |
| GO:0050790 | regulation of catalytic activity                                    | 4.11E-09 | 4.32E-07 | 1.64 (15592,1608,794,134)  |
| GO:1901987 | regulation of cell cycle phase transition                           | 4.15E-09 | 4.32E-07 | 2.87 (15592,260,794,38)    |
| GO:0023023 | MHC protein complex binding                                         | 3.76E-10 | 5.52E-07 | 17.46 (15592,9,794,8)      |
| GO:0050764 | regulation of phagocytosis                                          | 6.14E-09 | 6.35E-07 | 4.43 (15592,93,794,21)     |
| GO:0051239 | regulation of multicellular organismal process                      | 7.45E-09 | 7.66E-07 | 1.45 (15592,2724,794,201)  |
| GO:0032103 | positive regulation of response to external stimulus                | 7.58E-09 | 7.69E-07 | 2.76 (15592,277,794,39)    |
| GO:0031295 | T cell costimulation                                                | 7.57E-09 | 7.73E-07 | 9.00 (15592,24,794,11)     |
| GO:0048872 | homeostasis of number of cells                                      | 1.01E-08 | 1.02E-06 | 3.51 (15592,151,794,27)    |
| GO:0030890 | positive regulation of B cell proliferation                         | 1.09E-08 | 1.09E-06 | 7.09 (15592,36,794,13)     |
| GO:0050854 | regulation of antigen receptor-mediated signaling pathway           | 1.09E-08 | 1.09E-06 | 6.01 (15592,49,794,15)     |
| GO:0031349 | positive regulation of defense response                             | 1.19E-08 | 1.18E-06 | 2.76 (15592,270,794,38)    |
| GO:0046641 | positive regulation of alpha-beta T cell proliferation              | 1.29E-08 | 1.26E-06 | 9.82 (15592,20,794,10)     |
| GO:0031294 | lymphocyte costimulation                                            | 1.29E-08 | 1.26E-06 | 8.64 (15592,25,794,11)     |
| GO:1901990 | regulation of mitotic cell cycle phase transition                   | 1.30E-08 | 1.26E-06 | 2.90 (15592,237,794,35)    |
| GO:0008283 | cell proliferation                                                  | 1.40E-08 | 1.35E-06 | 2.25 (15592,480,794,55)    |
| GO:0051301 | cell division                                                       | 1.62E-08 | 1.55E-06 | 2.40 (15592,393,794,48)    |
| GO:0002285 | lymphocyte activation involved in immune response                   | 1.89E-08 | 1.79E-06 | 4.36 (15592,90,794,20)     |
| GO:0050707 | regulation of cytokine secretion                                    | 1.96E-08 | 1.85E-06 | 3.24 (15592,176,794,29)    |
| GO:0000775 | chromosome, centromeric region                                      | 7.11E-09 | 1.97E-06 | 3.67 (15592,139,794,26)    |
| GO:0030101 | natural killer cell activation                                      | 2.69E-08 | 2.52E-06 | 6.11 (15592,45,794,14)     |
| GO:0001910 | regulation of leukocyte mediated cytotoxicity                       | 2.70E-08 | 2.52E-06 | 4.71 (15592,75,794,18)     |
| GO:0032675 | regulation of interleukin-6 production                              | 3.00E-08 | 2.78E-06 | 3.65 (15592,129,794,24)    |
| GO:0002715 | regulation of natural killer cell mediated immunity                 | 3.33E-08 | 3.07E-06 | 6.55 (15592,39,794,13)     |
| GO:0065009 | regulation of molecular function                                    | 3.35E-08 | 3.07E-06 | 1.49 (15592,2185,794,166)  |
| GO:0007059 | chromosome segregation                                              | 3.43E-08 | 3.08E-06 | 3.89 (15592,111,794,22)    |
| GO:0048869 | cellular developmental process                                      | 3.41E-08 | 3.09E-06 | 1.45 (15592,2470,794,183)  |
| GO:0042035 | regulation of cytokine biosynthetic process                         | 3.40E-08 | 3.10E-06 | 4.22 (15592,93,794,20)     |
| GO:0046640 | regulation of alpha-beta T cell proliferation                       | 3.69E-08 | 3.30E-06 | 7.14 (15592,33,794,12)     |
| GO:0045060 | negative thymic T cell selection                                    | 4.48E-08 | 3.98E-06 | 12.08 (15592,13,794,8)     |
| GO:0006954 | inflammatory response                                               | 4.85E-08 | 4.26E-06 | 2.55 (15592,308,794,40)    |
| GO:0045088 | regulation of innate immune response                                | 4.84E-08 | 4.28E-06 | 2.81 (15592,238,794,34)    |
| GO:0050830 | defense response to Gram-positive bacterium                         | 5.19E-08 | 4.54E-06 | 4.53 (15592,78,794,18)     |
| GO:0097028 | dendritic cell differentiation                                      | 5.39E-08 | 4.69E-06 | 7.71 (15592,28,794,11)     |
| GO:0001912 | positive regulation of leukocyte mediated cytotoxicity              | 6.20E-08 | 5.36E-06 | 5.36 (15592,55,794,15)     |
| GO:0005886 | plasma membrane                                                     | 2.29E-08 | 5.54E-06 | 1.38 (15592,3333,794,234)  |
| GO:0032715 | negative regulation of interleukin-6 production                     | 6.56E-08 | 5.64E-06 | 6.23 (15592,41,794,13)     |
| GO:0030595 | leukocyte chemotaxis                                                | 7.06E-08 | 5.99E-06 | 3.89 (15592,106,794,21)    |
| GO:0034341 | response to interferon-gamma                                        | 7.06E-08 | 6.03E-06 | 3.89 (15592,106,794,21)    |
| GO:0032663 | regulation of interleukin-2 production                              | 8.98E-08 | 7.59E-06 | 5.61 (15592,49,794,14)     |
| GO:0032680 | regulation of tumor necrosis factor production                      | 9.85E-08 | 8.27E-06 | 3.34 (15592,147,794,25)    |
| GO:0010564 | regulation of cell cycle process                                    | 1.01E-07 | 8.45E-06 | 2.11 (15592,522,794,56)    |
| GO:0051276 | chromosome organization                                             | 1.08E-07 | 8.99E-06 | 2.59 (15592,281,794,37)    |
| GO:0005488 | binding                                                             | 8.21E-09 | 9.05E-06 | 1.13 (15592,10693,794,615) |
| GO:0045954 | positive regulation of natural killer cell mediated cytotoxicity    | 1.13E-07 | 9.31E-06 | 8.18 (15592,24,794,10)     |
| GO:0002717 | positive regulation of natural killer cell mediated immunity        | 1.13E-07 | 9.36E-06 | 8.18 (15592,24,794,10)     |
| GO:0048519 | negative regulation of biological process                           | 1.25E-07 | 1.02E-05 | 1.29 (15592,4404,794,290)  |
| GO:1903555 | regulation of tumor necrosis factor superfamily cytokine production | 1.29E-07 | 1.05E-05 | 3.29 (15592,149,794,25)    |
| GO:0002237 | response to molecule of bacterial origin                            | 1.48E-07 | 1.19E-05 | 2.78 (15592,226,794,32)    |
| GO:0051704 | multi-organism process                                              | 1.50E-07 | 1.21E-05 | 1.87 (15592,766,794,73)    |
| GO:0050777 | negative regulation of immune response                              | 1.52E-07 | 1.21E-05 | 3.47 (15592,130,794,23)    |
| GO:0051726 | regulation of cell cycle                                            | 1.56E-07 | 1.24E-05 | 1.82 (15592,854,794,79)    |
| GO:0042742 | defense response to bacterium                                       | 1.69E-07 | 1.33E-05 | 3.08 (15592,172,794,27)    |
| GO:0030154 | cell differentiation                                                | 1.70E-07 | 1.34E-05 | 1.52 (15592,1791,794,139)  |
| GO:1901988 | negative regulation of cell cycle phase transition                  | 1.75E-07 | 1.37E-05 | 3.45 (15592,131,794,23)    |
| GO:1902531 | regulation of intracellular signal transduction                     | 1.77E-07 | 1.38E-05 | 1.59 (15592,1486,794,120)  |
| GO:0038083 | peptidyl-tyrosine autophosphorylation                               | 1.85E-07 | 1.43E-05 | 6.97 (15592,31,794,11)     |
| GO:0023026 | MHC class II protein complex binding                                | 1.71E-08 | 1.51E-05 | 19.64 (15592,6,794,6)      |
| GO:0001772 | immunological synapse                                               | 7.90E-08 | 1.70E-05 | 6.73 (15592,35,794,12)     |
| GO:0042098 | T cell proliferation                                                | 2.22E-07 | 1.71E-05 | 6.20 (15592,38,794,12)     |
| GO:0042269 | regulation of natural killer cell mediated cytotoxicity             | 2.22E-07 | 1.71E-05 | 6.20 (15592,38,794,12)     |

|            |                                                                            |          |          |                           |
|------------|----------------------------------------------------------------------------|----------|----------|---------------------------|
| GO:0045059 | positive thymic T cell selection                                           | 2.39E-07 | 1.82E-05 | 12.50 (15592,11,794,7)    |
| GO:0007229 | integrin-mediated signaling pathway                                        | 2.66E-07 | 1.99E-05 | 4.55 (15592,69,794,16)    |
| GO:0050672 | negative regulation of lymphocyte proliferation                            | 2.66E-07 | 2.00E-05 | 4.55 (15592,69,794,16)    |
| GO:0046631 | alpha-beta T cell activation                                               | 2.64E-07 | 2.01E-05 | 5.19 (15592,53,794,14)    |
| GO:0032945 | negative regulation of mononuclear cell proliferation                      | 2.66E-07 | 2.01E-05 | 4.55 (15592,69,794,16)    |
| GO:0019724 | B cell mediated immunity                                                   | 2.80E-07 | 2.08E-05 | 7.55 (15592,26,794,10)    |
| GO:0001818 | negative regulation of cytokine production                                 | 2.85E-07 | 2.11E-05 | 2.75 (15592,221,794,31)   |
| GO:0007346 | regulation of mitotic cell cycle                                           | 2.98E-07 | 2.18E-05 | 2.16 (15592,445,794,49)   |
| GO:0009966 | regulation of signal transduction                                          | 2.97E-07 | 2.19E-05 | 1.43 (15592,2409,794,175) |
| GO:0007051 | spindle organization                                                       | 3.02E-07 | 2.21E-05 | 3.59 (15592,115,794,21)   |
| GO:0002702 | positive regulation of production of molecular mediator of immune response | 3.05E-07 | 2.22E-05 | 4.06 (15592,87,794,18)    |
| GO:0051336 | regulation of hydrolase activity                                           | 3.16E-07 | 2.28E-05 | 1.79 (15592,854,794,78)   |
| GO:0002827 | positive regulation of T-helper 1 type immune response                     | 3.72E-07 | 2.66E-05 | 8.42 (15592,21,794,9)     |
| GO:0016064 | immunoglobulin mediated immune response                                    | 3.72E-07 | 2.68E-05 | 8.42 (15592,21,794,9)     |
| GO:0006911 | phagocytosis, engulfment                                                   | 3.85E-07 | 2.74E-05 | 6.55 (15592,33,794,11)    |
| GO:0051282 | regulation of sequestering of calcium ion                                  | 3.90E-07 | 2.77E-05 | 3.67 (15592,107,794,20)   |
| GO:0002825 | regulation of T-helper 1 type immune response                              | 4.24E-07 | 2.99E-05 | 7.27 (15592,27,794,10)    |
| GO:0042108 | positive regulation of cytokine biosynthetic process                       | 4.35E-07 | 3.06E-05 | 4.68 (15592,63,794,15)    |
| GO:0042101 | T cell receptor complex                                                    | 2.04E-07 | 3.59E-05 | 10.47 (15592,15,794,8)    |
| GO:0032655 | regulation of interleukin-12 production                                    | 5.16E-07 | 3.61E-05 | 5.32 (15592,48,794,13)    |
| GO:0030099 | myeloid cell differentiation                                               | 5.38E-07 | 3.75E-05 | 2.99 (15592,171,794,26)   |
| GO:0006959 | humoral immune response                                                    | 5.48E-07 | 3.80E-05 | 3.47 (15592,119,794,21)   |
| GO:0046637 | regulation of alpha-beta T cell differentiation                            | 5.54E-07 | 3.82E-05 | 4.91 (15592,56,794,14)    |
| GO:0005819 | spindle                                                                    | 2.00E-07 | 3.87E-05 | 3.32 (15592,142,794,24)   |
| GO:0070664 | negative regulation of leukocyte proliferation                             | 6.06E-07 | 4.16E-05 | 4.30 (15592,73,794,16)    |
| GO:0090022 | regulation of neutrophil chemotaxis                                        | 6.29E-07 | 4.30E-05 | 7.01 (15592,28,794,10)    |
| GO:0046632 | alpha-beta T cell differentiation                                          | 7.52E-07 | 5.08E-05 | 5.61 (15592,42,794,12)    |
| GO:0046638 | positive regulation of alpha-beta T cell differentiation                   | 7.52E-07 | 5.10E-05 | 5.61 (15592,42,794,12)    |
| GO:0099024 | plasma membrane invagination                                               | 7.52E-07 | 5.12E-05 | 5.61 (15592,42,794,12)    |
| GO:0032879 | regulation of localization                                                 | 8.16E-07 | 5.48E-05 | 1.40 (15592,2480,794,177) |
| GO:0046777 | protein autophosphorylation                                                | 8.38E-07 | 5.61E-05 | 2.85 (15592,186,794,27)   |
| GO:0001782 | B cell homeostasis                                                         | 9.17E-07 | 6.10E-05 | 6.77 (15592,29,794,10)    |
| GO:0002761 | regulation of myeloid leukocyte differentiation                            | 9.68E-07 | 6.39E-05 | 3.48 (15592,113,794,20)   |
| GO:0050921 | positive regulation of chemotaxis                                          | 9.65E-07 | 6.40E-05 | 3.35 (15592,123,794,21)   |
| GO:0005694 | chromosome                                                                 | 4.01E-07 | 6.47E-05 | 2.18 (15592,423,794,47)   |
| GO:0090068 | positive regulation of cell cycle process                                  | 9.92E-07 | 6.52E-05 | 2.65 (15592,222,794,30)   |
| GO:0098687 | chromosomal region                                                         | 4.43E-07 | 6.60E-05 | 2.65 (15592,237,794,32)   |
| GO:0002275 | myeloid cell activation involved in immune response                        | 1.04E-06 | 6.76E-05 | 6.00 (15592,36,794,11)    |
| GO:0034097 | response to cytokine                                                       | 1.03E-06 | 6.77E-05 | 2.02 (15592,505,794,52)   |
| GO:0048523 | negative regulation of cellular process                                    | 1.07E-06 | 6.93E-05 | 1.29 (15592,3992,794,262) |
| GO:0014066 | regulation of phosphatidylinositol 3-kinase signaling                      | 1.07E-06 | 6.94E-05 | 3.93 (15592,85,794,17)    |
| GO:2000401 | regulation of lymphocyte migration                                         | 1.11E-06 | 7.11E-05 | 5.01 (15592,51,794,13)    |
| GO:0030889 | negative regulation of B cell proliferation                                | 1.21E-06 | 7.75E-05 | 8.73 (15592,18,794,8)     |
| GO:0050766 | positive regulation of phagocytosis                                        | 1.24E-06 | 7.94E-05 | 4.33 (15592,68,794,15)    |
| GO:1902715 | positive regulation of interferon-gamma secretion                          | 1.26E-06 | 8.00E-05 | 13.09 (15592,9,794,6)     |
| GO:0042100 | B cell proliferation                                                       | 1.31E-06 | 8.30E-05 | 6.55 (15592,30,794,10)    |
| GO:0051094 | positive regulation of developmental process                               | 1.34E-06 | 8.47E-05 | 1.58 (15592,1320,794,106) |
| GO:0098802 | plasma membrane receptor complex                                           | 6.43E-07 | 8.89E-05 | 3.12 (15592,151,794,24)   |
| GO:0045639 | positive regulation of myeloid cell differentiation                        | 1.51E-06 | 9.48E-05 | 3.84 (15592,87,794,17)    |
| GO:0009967 | positive regulation of signal transduction                                 | 1.66E-06 | 1.03E-04 | 1.57 (15592,1310,794,105) |
| GO:0002637 | regulation of immunoglobulin production                                    | 1.69E-06 | 1.05E-04 | 4.51 (15592,61,794,14)    |
| GO:1901991 | negative regulation of mitotic cell cycle phase transition                 | 1.71E-06 | 1.05E-04 | 3.36 (15592,117,794,20)   |
| GO:0000278 | mitotic cell cycle                                                         | 1.71E-06 | 1.06E-04 | 3.36 (15592,117,794,20)   |
| GO:2000514 | regulation of CD4-positive, alpha-beta T cell activation                   | 1.78E-06 | 1.09E-04 | 4.82 (15592,53,794,13)    |
| GO:0002886 | regulation of myeloid leukocyte mediated immunity                          | 1.78E-06 | 1.09E-04 | 4.82 (15592,53,794,13)    |
| GO:0030695 | GTPase regulator activity                                                  | 1.73E-07 | 1.09E-04 | 2.71 (15592,239,794,33)   |
| GO:2000516 | positive regulation of CD4-positive, alpha-beta T cell activation          | 1.85E-06 | 1.13E-04 | 6.33 (15592,31,794,10)    |
| GO:0098797 | plasma membrane protein complex                                            | 8.76E-07 | 1.13E-04 | 2.10 (15592,448,794,48)   |
| GO:0045588 | positive regulation of gamma-delta T cell differentiation                  | 1.94E-06 | 1.18E-04 | 16.36 (15592,6,794,5)     |
| GO:0046645 | positive regulation of gamma-delta T cell activation                       | 1.94E-06 | 1.18E-04 | 16.36 (15592,6,794,5)     |
| GO:0004896 | cytokine receptor activity                                                 | 1.61E-07 | 1.18E-04 | 4.45 (15592,75,794,17)    |
| GO:0051345 | positive regulation of hydrolase activity                                  | 1.98E-06 | 1.19E-04 | 2.04 (15592,461,794,48)   |
| GO:1902533 | positive regulation of intracellular signal transduction                   | 2.00E-06 | 1.20E-04 | 1.73 (15592,865,794,76)   |
| GO:0001773 | myeloid dendritic cell activation                                          | 2.15E-06 | 1.28E-04 | 7.07 (15592,25,794,9)     |
| GO:0006909 | phagocytosis                                                               | 2.23E-06 | 1.32E-04 | 4.15 (15592,71,794,15)    |
| GO:0002709 | regulation of T cell mediated immunity                                     | 2.23E-06 | 1.32E-04 | 4.15 (15592,71,794,15)    |
| GO:0002688 | regulation of leukocyte chemotaxis                                         | 2.24E-06 | 1.32E-04 | 3.57 (15592,99,794,18)    |
| GO:1902622 | regulation of neutrophil migration                                         | 2.52E-06 | 1.48E-04 | 5.54 (15592,39,794,11)    |
| GO:0032735 | positive regulation of interleukin-12 production                           | 2.57E-06 | 1.50E-04 | 6.14 (15592,32,794,10)    |
| GO:0005096 | GTPase activator activity                                                  | 3.16E-07 | 1.55E-04 | 2.74 (15592,222,794,31)   |
| GO:0032496 | response to lipopolysaccharide                                             | 2.69E-06 | 1.57E-04 | 2.63 (15592,209,794,28)   |
| GO:0098772 | molecular function regulator                                               | 2.89E-07 | 1.59E-04 | 1.59 (15592,1436,794,116) |
| GO:0045637 | regulation of myeloid cell differentiation                                 | 2.75E-06 | 1.60E-04 | 2.74 (15592,186,794,26)   |
| GO:0045937 | positive regulation of phosphate metabolic process                         | 2.84E-06 | 1.64E-04 | 1.66 (15592,980,794,83)   |
| GO:0010562 | positive regulation of phosphorus metabolic process                        | 2.84E-06 | 1.65E-04 | 1.66 (15592,980,794,83)   |
| GO:0050920 | regulation of chemotaxis                                                   | 3.04E-06 | 1.75E-04 | 2.73 (15592,187,794,26)   |
| GO:0032743 | positive regulation of interleukin-2 production                            | 3.14E-06 | 1.78E-04 | 6.80 (15592,26,794,9)     |
| GO:2000106 | regulation of leukocyte apoptotic process                                  | 3.12E-06 | 1.79E-04 | 3.83 (15592,82,794,16)    |
| GO:0002724 | regulation of T cell cytokine production                                   | 3.14E-06 | 1.79E-04 | 6.80 (15592,26,794,9)     |
| GO:0004713 | protein tyrosine kinase activity                                           | 4.08E-07 | 1.80E-04 | 3.52 (15592,117,794,21)   |
| GO:0035556 | intracellular signal transduction                                          | 3.48E-06 | 1.97E-04 | 1.58 (15592,1204,794,97)  |
| GO:0002889 | regulation of immunoglobulin mediated immune response                      | 3.57E-06 | 2.00E-04 | 4.91 (15592,48,794,12)    |
| GO:0002712 | regulation of B cell mediated immunity                                     | 3.57E-06 | 2.01E-04 | 4.91 (15592,48,794,12)    |
| GO:0010324 | membrane invagination                                                      | 3.57E-06 | 2.02E-04 | 4.91 (15592,48,794,12)    |
| GO:0002864 | regulation of acute inflammatory response to antigenic stimulus            | 3.89E-06 | 2.17E-04 | 9.16 (15592,15,794,7)     |
| GO:0030234 | enzyme regulator activity                                                  | 5.43E-07 | 2.18E-04 | 1.79 (15592,836,794,76)   |
| GO:0002704 | negative regulation of leukocyte mediated immunity                         | 4.52E-06 | 2.51E-04 | 4.81 (15592,49,794,12)    |
| GO:0048585 | negative regulation of response to stimulus                                | 4.56E-06 | 2.53E-04 | 1.53 (15592,1388,794,108) |
| GO:0050730 | regulation of peptidyl-tyrosine phosphorylation                            | 4.63E-06 | 2.55E-04 | 2.46 (15592,239,794,30)   |
| GO:0006956 | complement activation                                                      | 4.76E-06 | 2.62E-04 | 5.78 (15592,34,794,10)    |
| GO:0031399 | regulation of protein modification process                                 | 4.99E-06 | 2.73E-04 | 1.49 (15592,1570,794,119) |
| GO:0023051 | regulation of signaling                                                    | 5.54E-06 | 3.02E-04 | 1.34 (15592,2782,794,190) |
| GO:0043370 | regulation of CD4-positive, alpha-beta T cell differentiation              | 5.58E-06 | 3.04E-04 | 5.14 (15592,42,794,11)    |



|            |                                                                              |          |          |                           |
|------------|------------------------------------------------------------------------------|----------|----------|---------------------------|
| GO:0098636 | protein complex involved in cell adhesion                                    | 2.57E-06 | 3.11E-04 | 6.14 (15592,32,794,10)    |
| GO:0010646 | regulation of cell communication                                             | 5.87E-06 | 3.18E-04 | 1.34 (15592,2767,794,189) |
| GO:0001771 | immunological synapse formation                                              | 6.34E-06 | 3.42E-04 | 10.71 (15592,11,794,6)    |
| GO:0051383 | kinetochore organization                                                     | 6.60E-06 | 3.54E-04 | 8.59 (15592,16,794,7)     |
| GO:0045579 | positive regulation of B cell differentiation                                | 6.60E-06 | 3.55E-04 | 8.59 (15592,16,794,7)     |
| GO:0071593 | lymphocyte aggregation                                                       | 6.68E-06 | 3.57E-04 | 19.64 (15592,4,794,4)     |
| GO:0019221 | cytokine-mediated signaling pathway                                          | 6.72E-06 | 3.58E-04 | 2.56 (15592,207,794,27)   |
| GO:0001816 | cytokine production                                                          | 6.98E-06 | 3.70E-04 | 3.61 (15592,87,794,16)    |
| GO:0019220 | regulation of phosphate metabolic process                                    | 7.20E-06 | 3.80E-04 | 1.49 (15592,1500,794,114) |
| GO:0090023 | positive regulation of neutrophil chemotaxis                                 | 7.37E-06 | 3.88E-04 | 7.14 (15592,22,794,8)     |
| GO:0051174 | regulation of phosphorus metabolic process                                   | 7.42E-06 | 3.90E-04 | 1.49 (15592,1501,794,114) |
| GO:0051246 | regulation of protein metabolic process                                      | 7.85E-06 | 4.11E-04 | 1.37 (15592,2362,794,165) |
| GO:0002687 | positive regulation of leukocyte migration                                   | 8.01E-06 | 4.17E-04 | 3.04 (15592,129,794,20)   |
| GO:0002861 | regulation of inflammatory response to antigenic stimulus                    | 8.77E-06 | 4.52E-04 | 6.09 (15592,29,794,9)     |
| GO:1902100 | negative regulation of metaphase/anaphase transition of cell cycle           | 8.77E-06 | 4.54E-04 | 6.09 (15592,29,794,9)     |
| GO:0001562 | response to protozoan                                                        | 8.77E-06 | 4.55E-04 | 6.09 (15592,29,794,9)     |
| GO:0042325 | regulation of phosphorylation                                                | 8.86E-06 | 4.56E-04 | 1.52 (15592,1360,794,105) |
| GO:0071622 | regulation of granulocyte chemotaxis                                         | 9.11E-06 | 4.67E-04 | 4.91 (15592,44,794,11)    |
| GO:0051338 | regulation of transferase activity                                           | 9.25E-06 | 4.72E-04 | 1.72 (15592,765,794,67)   |
| GO:0032760 | positive regulation of tumor necrosis factor production                      | 9.46E-06 | 4.81E-04 | 3.53 (15592,89,794,16)    |
| GO:0050868 | negative regulation of T cell activation                                     | 9.50E-06 | 4.82E-04 | 3.37 (15592,99,794,17)    |
| GO:0016477 | cell migration                                                               | 9.62E-06 | 4.86E-04 | 1.75 (15592,706,794,63)   |
| GO:0045089 | positive regulation of innate immune response                                | 1.00E-05 | 5.04E-04 | 2.82 (15592,153,794,22)   |
| GO:0050855 | regulation of B cell receptor signaling pathway                              | 1.07E-05 | 5.39E-04 | 8.09 (15592,17,794,7)     |
| GO:0071624 | positive regulation of granulocyte chemotaxis                                | 1.08E-05 | 5.41E-04 | 6.83 (15592,23,794,8)     |
| GO:1903557 | positive regulation of tumor necrosis factor superfamily cytokine production | 1.10E-05 | 5.47E-04 | 3.49 (15592,90,794,16)    |
| GO:0043235 | receptor complex                                                             | 4.86E-06 | 5.54E-04 | 2.22 (15592,328,794,37)   |
| GO:0010389 | regulation of G2/M transition of mitotic cell cycle                          | 1.13E-05 | 5.61E-04 | 3.87 (15592,71,794,14)    |
| GO:0022610 | biological adhesion                                                          | 1.17E-05 | 5.79E-04 | 1.78 (15592,651,794,59)   |
| GO:1905819 | negative regulation of chromosome separation                                 | 1.20E-05 | 5.89E-04 | 5.89 (15592,30,794,9)     |
| GO:1902751 | positive regulation of cell cycle G2/M phase transition                      | 1.20E-05 | 5.91E-04 | 5.89 (15592,30,794,9)     |
| GO:0002883 | regulation of hypersensitivity                                               | 1.21E-05 | 5.94E-04 | 9.82 (15592,12,794,6)     |
| GO:1902713 | regulation of interferon-gamma secretion                                     | 1.21E-05 | 5.96E-04 | 9.82 (15592,12,794,6)     |
| GO:0043549 | regulation of kinase activity                                                | 1.29E-05 | 6.30E-04 | 1.76 (15592,668,794,60)   |
| GO:0044427 | chromosomal part                                                             | 5.95E-06 | 6.40E-04 | 1.71 (15592,815,794,71)   |
| GO:0043085 | positive regulation of catalytic activity                                    | 1.38E-05 | 6.70E-04 | 1.62 (15592,959,794,79)   |
| GO:0006468 | protein phosphorylation                                                      | 1.44E-05 | 6.96E-04 | 1.79 (15592,626,794,57)   |
| GO:0002698 | negative regulation of immune effector process                               | 1.54E-05 | 7.43E-04 | 3.13 (15592,113,794,18)   |
| GO:0032673 | regulation of interleukin-4 production                                       | 1.55E-05 | 7.43E-04 | 6.55 (15592,24,794,8)     |
| GO:0006958 | complement activation, classical pathway                                     | 1.55E-05 | 7.45E-04 | 6.55 (15592,24,794,8)     |
| GO:0002763 | positive regulation of myeloid leukocyte differentiation                     | 1.62E-05 | 7.75E-04 | 4.28 (15592,55,794,12)    |
| GO:0042327 | positive regulation of phosphorylation                                       | 1.64E-05 | 7.84E-04 | 1.63 (15592,917,794,76)   |
| GO:0002726 | positive regulation of T cell cytokine production                            | 1.68E-05 | 7.98E-04 | 7.64 (15592,18,794,7)     |
| GO:0051783 | regulation of nuclear division                                               | 1.75E-05 | 8.31E-04 | 2.66 (15592,170,794,23)   |
| GO:0051784 | negative regulation of nuclear division                                      | 1.80E-05 | 8.42E-04 | 4.60 (15592,47,794,11)    |
| GO:0002833 | positive regulation of response to biotic stimulus                           | 1.80E-05 | 8.44E-04 | 4.60 (15592,47,794,11)    |
| GO:0072676 | lymphocyte migration                                                         | 1.80E-05 | 8.47E-04 | 4.60 (15592,47,794,11)    |
| GO:0051247 | positive regulation of protein metabolic process                             | 1.82E-05 | 8.47E-04 | 1.47 (15592,1465,794,110) |
| GO:0070887 | cellular response to chemical stimulus                                       | 1.80E-05 | 8.49E-04 | 1.49 (15592,1399,794,106) |
| GO:0002820 | negative regulation of adaptive immune response                              | 1.83E-05 | 8.51E-04 | 5.04 (15592,39,794,10)    |
| GO:0000776 | kinetochore                                                                  | 8.69E-06 | 8.85E-04 | 3.14 (15592,119,794,19)   |
| GO:0051983 | regulation of chromosome segregation                                         | 1.94E-05 | 8.98E-04 | 3.34 (15592,94,794,16)    |
| GO:1902749 | regulation of cell cycle G2/M phase transition                               | 1.94E-05 | 8.98E-04 | 3.51 (15592,84,794,15)    |
| GO:0048534 | hematopoietic or lymphoid organ development                                  | 1.97E-05 | 9.08E-04 | 2.52 (15592,195,794,25)   |
| GO:0048302 | regulation of isotype switching to IgG isotypes                              | 2.16E-05 | 9.91E-04 | 9.06 (15592,13,794,6)     |
| GO:2000404 | regulation of T cell migration                                               | 2.33E-05 | 1.07E-03 | 4.91 (15592,40,794,10)    |
| GO:0051049 | regulation of transport                                                      | 2.40E-05 | 1.09E-03 | 1.43 (15592,1674,794,122) |
| GO:0040017 | positive regulation of locomotion                                            | 2.46E-05 | 1.12E-03 | 1.84 (15592,535,794,50)   |
| GO:0045807 | positive regulation of endocytosis                                           | 2.50E-05 | 1.14E-03 | 2.67 (15592,162,794,22)   |
| GO:0002831 | regulation of response to biotic stimulus                                    | 2.52E-05 | 1.14E-03 | 2.91 (15592,128,794,19)   |
| GO:0032753 | positive regulation of interleukin-4 production                              | 2.54E-05 | 1.14E-03 | 7.23 (15592,19,794,7)     |
| GO:0002690 | positive regulation of leukocyte chemotaxis                                  | 2.54E-05 | 1.14E-03 | 3.62 (15592,76,794,14)    |
| GO:0033045 | regulation of sister chromatid segregation                                   | 2.54E-05 | 1.14E-03 | 3.62 (15592,76,794,14)    |
| GO:0002577 | regulation of antigen processing and presentation                            | 2.54E-05 | 1.15E-03 | 7.23 (15592,19,794,7)     |
| GO:0005164 | tumor necrosis factor receptor binding                                       | 3.14E-06 | 1.15E-03 | 6.80 (15592,26,794,9)     |
| GO:0016020 | membrane                                                                     | 1.21E-05 | 1.17E-03 | 1.18 (15592,6327,794,380) |
| GO:0051716 | cellular response to stimulus                                                | 2.76E-05 | 1.23E-03 | 1.35 (15592,2328,794,160) |
| GO:0072686 | mitotic spindle                                                              | 1.34E-05 | 1.23E-03 | 3.82 (15592,72,794,14)    |
| GO:0033003 | regulation of mast cell activation                                           | 2.94E-05 | 1.30E-03 | 4.79 (15592,41,794,10)    |
| GO:0002707 | negative regulation of lymphocyte mediated immunity                          | 2.94E-05 | 1.31E-03 | 4.79 (15592,41,794,10)    |
| GO:0007155 | cell adhesion                                                                | 2.97E-05 | 1.31E-03 | 1.74 (15592,642,794,57)   |
| GO:0043372 | positive regulation of CD4-positive, alpha-beta T cell differentiation       | 3.00E-05 | 1.32E-03 | 6.04 (15592,26,794,8)     |
| GO:0032660 | regulation of interleukin-17 production                                      | 3.00E-05 | 1.32E-03 | 6.04 (15592,26,794,8)     |
| GO:0031401 | positive regulation of protein modification process                          | 3.15E-05 | 1.38E-03 | 1.55 (15592,1077,794,85)  |
| GO:0044425 | membrane part                                                                | 1.57E-05 | 1.38E-03 | 1.21 (15592,5108,794,315) |
| GO:2000026 | regulation of multicellular organismal development                           | 3.24E-05 | 1.42E-03 | 1.40 (15592,1854,794,132) |
| GO:0007093 | mitotic cell cycle checkpoint                                                | 3.31E-05 | 1.44E-03 | 3.21 (15592,98,794,16)    |
| GO:0002711 | positive regulation of T cell mediated immunity                              | 3.36E-05 | 1.46E-03 | 4.32 (15592,50,794,11)    |
| GO:1901989 | positive regulation of cell cycle phase transition                           | 3.44E-05 | 1.49E-03 | 3.35 (15592,88,794,15)    |
| GO:0000075 | cell cycle checkpoint                                                        | 3.55E-05 | 1.53E-03 | 2.95 (15592,120,794,18)   |
| GO:2001187 | positive regulation of CD8-positive, alpha-beta T cell activation            | 3.59E-05 | 1.54E-03 | 10.91 (15592,9,794,5)     |
| GO:0046643 | regulation of gamma-delta T cell activation                                  | 3.59E-05 | 1.54E-03 | 10.91 (15592,9,794,5)     |
| GO:0045586 | regulation of gamma-delta T cell differentiation                             | 3.59E-05 | 1.55E-03 | 10.91 (15592,9,794,5)     |
| GO:0044093 | positive regulation of molecular function                                    | 3.70E-05 | 1.56E-03 | 1.49 (15592,1292,794,98)  |
| GO:0010948 | negative regulation of cell cycle process                                    | 3.67E-05 | 1.57E-03 | 2.48 (15592,190,794,24)   |
| GO:0098813 | nuclear chromosome segregation                                               | 3.69E-05 | 1.57E-03 | 4.68 (15592,42,794,10)    |
| GO:0072376 | protein activation cascade                                                   | 3.69E-05 | 1.57E-03 | 4.68 (15592,42,794,10)    |
| GO:0050708 | regulation of protein secretion                                              | 3.78E-05 | 1.60E-03 | 1.92 (15592,429,794,42)   |
| GO:0006897 | endocytosis                                                                  | 3.82E-05 | 1.61E-03 | 2.04 (15592,346,794,36)   |
| GO:1903038 | negative regulation of leukocyte cell-cell adhesion                          | 3.93E-05 | 1.65E-03 | 3.03 (15592,110,794,17)   |
| GO:0060589 | nucleoside-triphosphatase regulator activity                                 | 4.94E-06 | 1.67E-03 | 2.34 (15592,277,794,33)   |
| GO:0006310 | DNA recombination                                                            | 4.02E-05 | 1.68E-03 | 2.59 (15592,167,794,22)   |
| GO:0046456 | icosanoid biosynthetic process                                               | 4.08E-05 | 1.69E-03 | 5.82 (15592,27,794,8)     |

|            |                                                                                                    |          |          |                            |
|------------|----------------------------------------------------------------------------------------------------|----------|----------|----------------------------|
| GO:0010971 | positive regulation of G2/M transition of mitotic cell cycle                                       | 4.08E-05 | 1.70E-03 | 5.82 (15592,27,794,8)      |
| GO:0042832 | defense response to protozoan                                                                      | 4.08E-05 | 1.70E-03 | 5.82 (15592,27,794,8)      |
| GO:0001932 | regulation of protein phosphorylation                                                              | 4.16E-05 | 1.72E-03 | 1.50 (15592,1247,794,95)   |
| GO:0010647 | positive regulation of cell communication                                                          | 4.26E-05 | 1.76E-03 | 1.45 (15592,1478,794,109)  |
| GO:0043550 | regulation of lipid kinase activity                                                                | 4.59E-05 | 1.88E-03 | 4.57 (15592,43,794,10)     |
| GO:0051209 | release of sequestered calcium ion into cytosol                                                    | 4.59E-05 | 1.88E-03 | 4.57 (15592,43,794,10)     |
| GO:0002791 | regulation of peptide secretion                                                                    | 4.58E-05 | 1.89E-03 | 1.87 (15592,461,794,44)    |
| GO:0051985 | negative regulation of chromosome segregation                                                      | 4.69E-05 | 1.92E-03 | 5.05 (15592,35,794,9)      |
| GO:0010033 | response to organic substance                                                                      | 4.84E-05 | 1.97E-03 | 1.40 (15592,1751,794,125)  |
| GO:0030097 | hemopoiesis                                                                                        | 4.84E-05 | 1.97E-03 | 3.11 (15592,101,794,16)    |
| GO:1905818 | regulation of chromosome separation                                                                | 4.86E-05 | 1.97E-03 | 3.86 (15592,61,794,12)     |
| GO:0051272 | positive regulation of cellular component movement                                                 | 4.87E-05 | 1.97E-03 | 1.81 (15592,520,794,48)    |
| GO:0010522 | regulation of calcium ion transport into cytosol                                                   | 5.16E-05 | 2.08E-03 | 3.24 (15592,91,794,15)     |
| GO:0001891 | phagocytic cup                                                                                     | 2.54E-05 | 2.14E-03 | 7.23 (15592,19,794,7)      |
| GO:0045589 | regulation of regulatory T cell differentiation                                                    | 5.36E-05 | 2.16E-03 | 6.55 (15592,21,794,7)      |
| GO:0030335 | positive regulation of cell migration                                                              | 5.38E-05 | 2.16E-03 | 1.83 (15592,493,794,46)    |
| GO:0045787 | positive regulation of cell cycle                                                                  | 5.41E-05 | 2.16E-03 | 2.08 (15592,311,794,33)    |
| GO:0045841 | negative regulation of mitotic metaphase/anaphase transition                                       | 5.46E-05 | 2.18E-03 | 5.61 (15592,28,794,8)      |
| GO:0051270 | regulation of cellular component movement                                                          | 5.54E-05 | 2.20E-03 | 1.58 (15592,919,794,74)    |
| GO:0035639 | purine ribonucleoside triphosphate binding                                                         | 7.03E-06 | 2.21E-03 | 1.49 (15592,1532,794,116)  |
| GO:0045597 | positive regulation of cell differentiation                                                        | 5.65E-05 | 2.24E-03 | 1.56 (15592,967,794,77)    |
| GO:0045576 | mast cell activation                                                                               | 5.76E-05 | 2.28E-03 | 7.85 (15592,15,794,6)      |
| GO:1902850 | microtubule cytoskeleton organization involved in mitosis                                          | 5.88E-05 | 2.32E-03 | 3.20 (15592,92,794,15)     |
| GO:0002573 | myeloid leukocyte differentiation                                                                  | 5.88E-05 | 2.32E-03 | 3.20 (15592,92,794,15)     |
| GO:0002823 | negative regulation of adaptive immune response based on somatic recombination of immune receptors | 5.98E-05 | 2.32E-03 | 4.91 (15592,36,794,9)      |
| GO:1902099 | regulation of metaphase/anaphase transition of cell cycle                                          | 5.96E-05 | 2.33E-03 | 4.08 (15592,53,794,11)     |
| GO:0002714 | positive regulation of B cell mediated immunity                                                    | 5.98E-05 | 2.33E-03 | 4.91 (15592,36,794,9)      |
| GO:0002891 | positive regulation of immunoglobulin mediated immune response                                     | 5.98E-05 | 2.33E-03 | 4.91 (15592,36,794,9)      |
| GO:0002673 | regulation of acute inflammatory response                                                          | 5.96E-05 | 2.34E-03 | 4.08 (15592,53,794,11)     |
| GO:0045930 | negative regulation of mitotic cell cycle                                                          | 6.08E-05 | 2.36E-03 | 2.40 (15592,196,794,24)    |
| GO:0002718 | regulation of cytokine production involved in immune response                                      | 6.12E-05 | 2.36E-03 | 3.55 (15592,72,794,13)     |
| GO:0030334 | regulation of cell migration                                                                       | 6.31E-05 | 2.43E-03 | 1.62 (15592,813,794,67)    |
| GO:0007204 | positive regulation of cytosolic calcium ion concentration                                         | 6.64E-05 | 2.55E-03 | 2.26 (15592,235,794,27)    |
| GO:0042105 | alpha-beta T cell receptor complex                                                                 | 3.20E-05 | 2.58E-03 | 15.71 (15592,5,794,4)      |
| GO:0007088 | regulation of mitotic nuclear division                                                             | 6.82E-05 | 2.62E-03 | 2.64 (15592,149,794,20)    |
| GO:0032060 | bleb assembly                                                                                      | 6.88E-05 | 2.63E-03 | 9.82 (15592,10,794,5)      |
| GO:0051283 | negative regulation of sequestering of calcium ion                                                 | 6.96E-05 | 2.66E-03 | 4.36 (15592,45,794,10)     |
| GO:2000145 | regulation of cell motility                                                                        | 6.99E-05 | 2.66E-03 | 1.60 (15592,847,794,69)    |
| GO:0031234 | extrinsic component of cytoplasmic side of plasma membrane                                         | 3.43E-05 | 2.66E-03 | 3.99 (15592,59,794,12)     |
| GO:0071346 | cellular response to interferon-gamma                                                              | 7.03E-05 | 2.67E-03 | 3.31 (15592,83,794,14)     |
| GO:0043029 | T cell homeostasis                                                                                 | 7.20E-05 | 2.72E-03 | 5.42 (15592,29,794,8)      |
| GO:2000816 | negative regulation of mitotic sister chromatid separation                                         | 7.20E-05 | 2.73E-03 | 5.42 (15592,29,794,8)      |
| GO:0032268 | regulation of cellular protein metabolic process                                                   | 7.32E-05 | 2.76E-03 | 1.34 (15592,2197,794,150)  |
| GO:0031325 | positive regulation of cellular metabolic process                                                  | 7.40E-05 | 2.78E-03 | 1.29 (15592,2813,794,185)  |
| GO:0050731 | positive regulation of peptidyl-tyrosine phosphorylation                                           | 7.54E-05 | 2.81E-03 | 2.48 (15592,174,794,22)    |
| GO:0050858 | negative regulation of antigen receptor-mediated signaling pathway                                 | 7.52E-05 | 2.82E-03 | 6.25 (15592,22,794,7)      |
| GO:0043087 | regulation of GTPase activity                                                                      | 7.53E-05 | 2.82E-03 | 2.13 (15592,276,794,30)    |
| GO:0009987 | cellular process                                                                                   | 7.80E-05 | 2.90E-03 | 1.09 (15592,10789,794,597) |
| GO:0040011 | locomotion                                                                                         | 8.07E-05 | 3.00E-03 | 1.59 (15592,851,794,69)    |
| GO:0097367 | carbohydrate derivative binding                                                                    | 1.02E-05 | 3.01E-03 | 1.42 (15592,1861,794,135)  |
| GO:0009893 | positive regulation of metabolic process                                                           | 8.15E-05 | 3.02E-03 | 1.27 (15592,3050,794,198)  |
| GO:0071310 | cellular response to organic substance                                                             | 8.20E-05 | 3.03E-03 | 1.50 (15592,1139,794,87)   |
| GO:0023056 | positive regulation of signaling                                                                   | 8.39E-05 | 3.09E-03 | 1.43 (15592,1486,794,108)  |
| GO:0001934 | positive regulation of protein phosphorylation                                                     | 8.45E-05 | 3.11E-03 | 1.58 (15592,868,794,70)    |
| GO:2000107 | negative regulation of leukocyte apoptotic process                                                 | 8.49E-05 | 3.11E-03 | 4.27 (15592,46,794,10)     |
| GO:0050714 | positive regulation of protein secretion                                                           | 8.75E-05 | 3.20E-03 | 2.15 (15592,265,794,29)    |
| GO:0043299 | leukocyte degranulation                                                                            | 8.82E-05 | 3.20E-03 | 7.36 (15592,16,794,6)      |
| GO:0045076 | regulation of interleukin-2 biosynthetic process                                                   | 8.82E-05 | 3.21E-03 | 7.36 (15592,16,794,6)      |
| GO:0001779 | natural killer cell differentiation                                                                | 8.82E-05 | 3.21E-03 | 7.36 (15592,16,794,6)      |
| GO:0006691 | leukotriene metabolic process                                                                      | 8.82E-05 | 3.22E-03 | 7.36 (15592,16,794,6)      |
| GO:0071216 | cellular response to biotic stimulus                                                               | 9.07E-05 | 3.28E-03 | 2.51 (15592,164,794,21)    |
| GO:0050798 | activated T cell proliferation                                                                     | 9.22E-05 | 3.32E-03 | 13.09 (15592,6,794,4)      |
| GO:0032609 | interferon-gamma production                                                                        | 9.22E-05 | 3.33E-03 | 13.09 (15592,6,794,4)      |
| GO:0014068 | positive regulation of phosphatidylinositol 3-kinase signaling                                     | 9.32E-05 | 3.34E-03 | 3.63 (15592,65,794,12)     |
| GO:0002701 | negative regulation of production of molecular mediator of immune response                         | 9.39E-05 | 3.34E-03 | 5.24 (15592,30,794,8)      |
| GO:0007052 | mitotic spindle organization                                                                       | 9.32E-05 | 3.35E-03 | 3.63 (15592,65,794,12)     |
| GO:0050728 | negative regulation of inflammatory response                                                       | 9.36E-05 | 3.35E-03 | 2.74 (15592,129,794,18)    |
| GO:0043304 | regulation of mast cell degranulation                                                              | 9.39E-05 | 3.35E-03 | 5.24 (15592,30,794,8)      |
| GO:0031348 | negative regulation of defense response                                                            | 9.46E-05 | 3.36E-03 | 2.39 (15592,189,794,23)    |
| GO:2000147 | positive regulation of cell motility                                                               | 9.56E-05 | 3.39E-03 | 1.79 (15592,505,794,46)    |
| GO:0010965 | regulation of mitotic sister chromatid separation                                                  | 1.01E-04 | 3.57E-03 | 3.86 (15592,56,794,11)     |
| GO:0010959 | regulation of metal ion transport                                                                  | 1.03E-04 | 3.62E-03 | 1.95 (15592,363,794,36)    |
| GO:0002720 | positive regulation of cytokine production involved in immune response                             | 1.03E-04 | 3.63E-03 | 4.18 (15592,47,794,10)     |
| GO:0051128 | regulation of cellular component organization                                                      | 1.04E-04 | 3.64E-03 | 1.32 (15592,2300,794,155)  |
| GO:0071219 | cellular response to molecule of bacterial origin                                                  | 1.07E-04 | 3.75E-03 | 2.63 (15592,142,794,19)    |
| GO:0045786 | negative regulation of cell cycle                                                                  | 1.09E-04 | 3.80E-03 | 1.94 (15592,364,794,36)    |
| GO:0051173 | positive regulation of nitrogen compound metabolic process                                         | 1.13E-04 | 3.95E-03 | 1.29 (15592,2692,794,177)  |
| GO:0071345 | cellular response to cytokine stimulus                                                             | 1.14E-04 | 3.96E-03 | 1.90 (15592,393,794,38)    |
| GO:0000777 | condensed chromosome kinetochore                                                                   | 5.36E-05 | 3.99E-03 | 6.55 (15592,21,794,7)      |
| GO:1902532 | negative regulation of intracellular signal transduction                                           | 1.17E-04 | 4.06E-03 | 1.80 (15592,480,794,44)    |
| GO:0032555 | purine ribonucleotide binding                                                                      | 1.47E-05 | 4.06E-03 | 1.46 (15592,1590,794,118)  |
| GO:0033006 | regulation of mast cell activation involved in immune response                                     | 1.21E-04 | 4.10E-03 | 5.07 (15592,31,794,8)      |
| GO:1902624 | positive regulation of neutrophil migration                                                        | 1.21E-04 | 4.11E-03 | 5.07 (15592,31,794,8)      |
| GO:0051382 | kinetochore assembly                                                                               | 1.21E-04 | 4.12E-03 | 8.93 (15592,11,794,5)      |
| GO:0000819 | sister chromatid segregation                                                                       | 1.21E-04 | 4.12E-03 | 5.07 (15592,31,794,8)      |
| GO:0043405 | regulation of MAP kinase activity                                                                  | 1.22E-04 | 4.12E-03 | 2.11 (15592,270,794,29)    |
| GO:0048304 | positive regulation of isotype switching to IgG isotypes                                           | 1.21E-04 | 4.13E-03 | 8.93 (15592,11,794,5)      |
| GO:0000940 | condensed chromosome outer kinetochore                                                             | 5.76E-05 | 4.13E-03 | 7.85 (15592,15,794,6)      |
| GO:0030593 | neutrophil chemotaxis                                                                              | 1.20E-04 | 4.14E-03 | 3.79 (15592,57,794,11)     |
| GO:0032502 | developmental process                                                                              | 1.20E-04 | 4.14E-03 | 1.22 (15592,4054,794,252)  |
| GO:0019370 | leukotriene biosynthetic process                                                                   | 1.21E-04 | 4.14E-03 | 8.93 (15592,11,794,5)      |
| GO:0045086 | positive regulation of interleukin-2 biosynthetic process                                          | 1.21E-04 | 4.15E-03 | 8.93 (15592,11,794,5)      |
| GO:0006968 | cellular defense response                                                                          | 1.21E-04 | 4.16E-03 | 8.93 (15592,11,794,5)      |

|            |                                                                                            |          |          |                           |
|------------|--------------------------------------------------------------------------------------------|----------|----------|---------------------------|
| GO:0002244 | hematopoietic progenitor cell differentiation                                              | 1.24E-04 | 4.17E-03 | 3.01 (15592,98,794,15)    |
| GO:0042531 | positive regulation of tyrosine phosphorylation of STAT protein                            | 1.24E-04 | 4.18E-03 | 4.09 (15592,48,794,10)    |
| GO:0046427 | positive regulation of JAK-STAT cascade                                                    | 1.26E-04 | 4.24E-03 | 3.52 (15592,67,794,12)    |
| GO:0042609 | CD4 receptor binding                                                                       | 1.67E-05 | 4.32E-03 | 12.27 (15592,8,794,5)     |
| GO:0035984 | cellular response to trichostatin A                                                        | 1.32E-04 | 4.34E-03 | 19.64 (15592,3,794,3)     |
| GO:0002834 | regulation of response to tumor cell                                                       | 1.31E-04 | 4.35E-03 | 6.93 (15592,17,794,6)     |
| GO:0035983 | response to trichostatin A                                                                 | 1.32E-04 | 4.35E-03 | 19.64 (15592,3,794,3)     |
| GO:0002837 | regulation of immune response to tumor cell                                                | 1.31E-04 | 4.36E-03 | 6.93 (15592,17,794,6)     |
| GO:0032270 | positive regulation of cellular protein metabolic process                                  | 1.31E-04 | 4.36E-03 | 1.43 (15592,1369,794,100) |
| GO:0071663 | positive regulation of granzyme B production                                               | 1.32E-04 | 4.36E-03 | 19.64 (15592,3,794,3)     |
| GO:0030852 | regulation of granulocyte differentiation                                                  | 1.31E-04 | 4.37E-03 | 6.93 (15592,17,794,6)     |
| GO:0071661 | regulation of granzyme B production                                                        | 1.32E-04 | 4.37E-03 | 19.64 (15592,3,794,3)     |
| GO:1903046 | meiotic cell cycle process                                                                 | 1.33E-04 | 4.39E-03 | 2.76 (15592,121,794,17)   |
| GO:0048469 | cell maturation                                                                            | 1.38E-04 | 4.53E-03 | 2.86 (15592,110,794,16)   |
| GO:0007094 | mitotic spindle assembly checkpoint                                                        | 1.40E-04 | 4.57E-03 | 5.73 (15592,24,794,7)     |
| GO:0050793 | regulation of developmental process                                                        | 1.40E-04 | 4.57E-03 | 1.32 (15592,2314,794,155) |
| GO:0017076 | purine nucleotide binding                                                                  | 2.07E-05 | 4.57E-03 | 1.45 (15592,1602,794,118) |
| GO:0071173 | spindle assembly checkpoint                                                                | 1.40E-04 | 4.58E-03 | 5.73 (15592,24,794,7)     |
| GO:0010604 | positive regulation of macromolecule metabolic process                                     | 1.41E-04 | 4.60E-03 | 1.28 (15592,2810,794,183) |
| GO:0032653 | regulation of interleukin-10 production                                                    | 1.45E-04 | 4.70E-03 | 4.42 (15592,40,794,9)     |
| GO:0008047 | enzyme activator activity                                                                  | 2.05E-05 | 4.76E-03 | 1.97 (15592,418,794,42)   |
| GO:0000778 | condensed nuclear chromosome kinetochore                                                   | 6.88E-05 | 4.76E-03 | 9.82 (15592,10,794,5)     |
| GO:0032553 | ribonucleotide binding                                                                     | 2.02E-05 | 4.94E-03 | 1.45 (15592,1601,794,118) |
| GO:0033048 | negative regulation of mitotic sister chromatid segregation                                | 1.54E-04 | 5.00E-03 | 4.91 (15592,32,794,8)     |
| GO:0008285 | negative regulation of cell proliferation                                                  | 1.57E-04 | 5.10E-03 | 1.69 (15592,606,794,52)   |
| GO:0040012 | regulation of locomotion                                                                   | 1.63E-04 | 5.26E-03 | 1.54 (15592,919,794,72)   |
| GO:0051130 | positive regulation of cellular component organization                                     | 1.63E-04 | 5.26E-03 | 1.47 (15592,1162,794,87)  |
| GO:0051924 | regulation of calcium ion transport                                                        | 1.67E-04 | 5.38E-03 | 2.17 (15592,235,794,26)   |
| GO:0042221 | response to chemical                                                                       | 1.68E-04 | 5.38E-03 | 1.32 (15592,2165,794,146) |
| GO:0006928 | movement of cell or subcellular component                                                  | 1.75E-04 | 5.61E-03 | 1.48 (15592,1099,794,83)  |
| GO:0045839 | negative regulation of mitotic nuclear division                                            | 1.77E-04 | 5.64E-03 | 4.31 (15592,41,794,9)     |
| GO:0043300 | regulation of leukocyte degranulation                                                      | 1.77E-04 | 5.65E-03 | 4.31 (15592,41,794,9)     |
| GO:0000281 | mitotic cytokinesis                                                                        | 1.78E-04 | 5.66E-03 | 3.93 (15592,50,794,10)    |
| GO:0002793 | positive regulation of peptide secretion                                                   | 1.83E-04 | 5.82E-03 | 2.03 (15592,290,794,30)   |
| GO:0048870 | cell motility                                                                              | 1.84E-04 | 5.83E-03 | 1.59 (15592,780,794,63)   |
| GO:0050901 | leukocyte tethering or rolling                                                             | 1.87E-04 | 5.90E-03 | 6.55 (15592,18,794,6)     |
| GO:0061756 | leukocyte adhesion to vascular endothelial cell                                            | 1.87E-04 | 5.91E-03 | 6.55 (15592,18,794,6)     |
| GO:0043011 | myeloid dendritic cell differentiation                                                     | 1.87E-04 | 5.92E-03 | 6.55 (15592,18,794,6)     |
| GO:0033046 | negative regulation of sister chromatid segregation                                        | 1.94E-04 | 6.07E-03 | 4.76 (15592,33,794,8)     |
| GO:1902106 | negative regulation of leukocyte differentiation                                           | 1.95E-04 | 6.07E-03 | 3.02 (15592,91,794,14)    |
| GO:0060402 | calcium ion transport into cytosol                                                         | 1.93E-04 | 6.08E-03 | 3.60 (15592,60,794,11)    |
| GO:0016310 | phosphorylation                                                                            | 1.94E-04 | 6.08E-03 | 1.57 (15592,813,794,65)   |
| GO:0050856 | regulation of T cell receptor signaling pathway                                            | 1.94E-04 | 6.08E-03 | 4.76 (15592,33,794,8)     |
| GO:0043408 | regulation of MAPK cascade                                                                 | 1.96E-04 | 6.10E-03 | 1.65 (15592,642,794,54)   |
| GO:0002836 | positive regulation of response to tumor cell                                              | 1.98E-04 | 6.14E-03 | 8.18 (15592,12,794,5)     |
| GO:0002839 | positive regulation of immune response to tumor cell                                       | 1.98E-04 | 6.16E-03 | 8.18 (15592,12,794,5)     |
| GO:0050859 | negative regulation of B cell receptor signaling pathway                                   | 2.06E-04 | 6.38E-03 | 11.22 (15592,7,794,4)     |
| GO:0031641 | regulation of myelination                                                                  | 2.11E-04 | 6.51E-03 | 3.85 (15592,51,794,10)    |
| GO:0030071 | regulation of mitotic metaphase/anaphase transition                                        | 2.11E-04 | 6.52E-03 | 3.85 (15592,51,794,10)    |
| GO:1904894 | positive regulation of STAT cascade                                                        | 2.24E-04 | 6.88E-03 | 3.32 (15592,71,794,12)    |
| GO:0043547 | positive regulation of GTPase activity                                                     | 2.39E-04 | 7.32E-03 | 2.25 (15592,201,794,23)   |
| GO:0019955 | cytokine binding                                                                           | 3.49E-05 | 7.32E-03 | 3.06 (15592,109,794,17)   |
| GO:2000403 | positive regulation of lymphocyte migration                                                | 2.43E-04 | 7.37E-03 | 4.62 (15592,34,794,8)     |
| GO:0005524 | ATP binding                                                                                | 3.68E-05 | 7.38E-03 | 1.50 (15592,1243,794,95)  |
| GO:0043551 | regulation of phosphatidylinositol 3-kinase activity                                       | 2.43E-04 | 7.39E-03 | 4.62 (15592,34,794,8)     |
| GO:0031577 | spindle checkpoint                                                                         | 2.43E-04 | 7.40E-03 | 5.29 (15592,26,794,7)     |
| GO:0071174 | mitotic spindle checkpoint                                                                 | 2.43E-04 | 7.41E-03 | 5.29 (15592,26,794,7)     |
| GO:0043552 | positive regulation of phosphatidylinositol 3-kinase activity                              | 2.43E-04 | 7.43E-03 | 5.29 (15592,26,794,7)     |
| GO:0097553 | calcium ion transmembrane import into cytosol                                              | 2.50E-04 | 7.57E-03 | 3.78 (15592,52,794,10)    |
| GO:0002312 | B cell activation involved in immune response                                              | 2.60E-04 | 7.86E-03 | 4.11 (15592,43,794,9)     |
| GO:0010863 | positive regulation of phospholipase C activity                                            | 2.62E-04 | 7.91E-03 | 6.20 (15592,19,794,6)     |
| GO:0001894 | tissue homeostasis                                                                         | 2.66E-04 | 8.01E-03 | 2.61 (15592,128,794,17)   |
| GO:0097529 | myeloid leukocyte migration                                                                | 2.76E-04 | 8.29E-03 | 2.92 (15592,94,794,14)    |
| GO:1903169 | regulation of calcium ion transmembrane transport                                          | 2.93E-04 | 8.78E-03 | 2.51 (15592,141,794,18)   |
| GO:0007010 | cytoskeleton organization                                                                  | 3.13E-04 | 9.37E-03 | 1.58 (15592,748,794,60)   |
| GO:0043067 | regulation of programmed cell death                                                        | 3.16E-04 | 9.45E-03 | 1.41 (15592,1369,794,98)  |
| GO:0030100 | regulation of endocytosis                                                                  | 3.22E-04 | 9.59E-03 | 2.02 (15592,272,794,28)   |
| GO:0032970 | regulation of actin filament-based process                                                 | 3.23E-04 | 9.60E-03 | 1.88 (15592,356,794,34)   |
| GO:0045859 | regulation of protein kinase activity                                                      | 3.26E-04 | 9.67E-03 | 1.64 (15592,609,794,51)   |
| GO:0006259 | DNA metabolic process                                                                      | 3.30E-04 | 9.78E-03 | 1.65 (15592,594,794,50)   |
| GO:0051347 | positive regulation of transferase activity                                                | 3.44E-04 | 1.02E-02 | 1.71 (15592,504,794,44)   |
| GO:0000724 | double-strand break repair via homologous recombination                                    | 3.46E-04 | 1.02E-02 | 3.00 (15592,85,794,13)    |
| GO:0000725 | recombinational repair                                                                     | 3.46E-04 | 1.02E-02 | 3.00 (15592,85,794,13)    |
| GO:0043407 | negative regulation of MAP kinase activity                                                 | 3.49E-04 | 1.02E-02 | 3.38 (15592,64,794,11)    |
| GO:0071621 | granulocyte chemotaxis                                                                     | 3.49E-04 | 1.03E-02 | 3.38 (15592,64,794,11)    |
| GO:0032956 | regulation of actin cytoskeleton organization                                              | 3.69E-04 | 1.08E-02 | 1.93 (15592,316,794,31)   |
| GO:0098657 | import into cell                                                                           | 3.82E-04 | 1.12E-02 | 1.77 (15592,432,794,39)   |
| GO:0045084 | positive regulation of interleukin-12 biosynthetic process                                 | 3.96E-04 | 1.15E-02 | 9.82 (15592,8,794,4)      |
| GO:0032817 | regulation of natural killer cell proliferation                                            | 3.96E-04 | 1.15E-02 | 9.82 (15592,8,794,4)      |
| GO:0002858 | regulation of natural killer cell mediated cytotoxicity directed against tumor cell target | 3.96E-04 | 1.15E-02 | 9.82 (15592,8,794,4)      |
| GO:0002855 | regulation of natural killer cell mediated immune response to tumor cell                   | 3.96E-04 | 1.15E-02 | 9.82 (15592,8,794,4)      |
| GO:0000070 | mitotic sister chromatid segregation                                                       | 4.00E-04 | 1.15E-02 | 4.91 (15592,28,794,7)     |
| GO:0033047 | regulation of mitotic sister chromatid segregation                                         | 4.01E-04 | 1.15E-02 | 3.32 (15592,65,794,11)    |
| GO:2000508 | regulation of dendritic cell chemotaxis                                                    | 3.96E-04 | 1.16E-02 | 9.82 (15592,8,794,4)      |
| GO:0002920 | regulation of humoral immune response                                                      | 4.00E-04 | 1.16E-02 | 4.91 (15592,28,794,7)     |
| GO:0000226 | microtubule cytoskeleton organization                                                      | 4.08E-04 | 1.17E-02 | 1.89 (15592,332,794,32)   |
| GO:0051241 | negative regulation of multicellular organismal process                                    | 4.08E-04 | 1.17E-02 | 1.44 (15592,1145,794,84)  |
| GO:0071222 | cellular response to lipopolysaccharide                                                    | 4.21E-04 | 1.20E-02 | 2.51 (15592,133,794,17)   |
| GO:0008092 | cytoskeletal protein binding                                                               | 7.15E-05 | 1.21E-02 | 1.59 (15592,879,794,71)   |
| GO:0043168 | anion binding                                                                              | 6.80E-05 | 1.25E-02 | 1.33 (15592,2368,794,160) |
| GO:0004672 | protein kinase activity                                                                    | 7.11E-05 | 1.25E-02 | 1.79 (15592,528,794,48)   |
| GO:0032732 | positive regulation of interleukin-1 production                                            | 4.43E-04 | 1.26E-02 | 3.84 (15592,46,794,9)     |
| GO:0032559 | adenyl ribonucleotide binding                                                              | 6.58E-05 | 1.26E-02 | 1.47 (15592,1295,794,97)  |

|            |                                                                                  |          |          |                           |
|------------|----------------------------------------------------------------------------------|----------|----------|---------------------------|
| GO:0045620 | negative regulation of lymphocyte differentiation                                | 4.43E-04 | 1.27E-02 | 3.84 (15592,46,794,9)     |
| GO:0033043 | regulation of organelle organization                                             | 4.50E-04 | 1.28E-02 | 1.44 (15592,1132,794,83)  |
| GO:0032814 | regulation of natural killer cell activation                                     | 4.51E-04 | 1.28E-02 | 4.25 (15592,37,794,8)     |
| GO:1990266 | neutrophil migration                                                             | 4.59E-04 | 1.30E-02 | 3.27 (15592,66,794,11)    |
| GO:0032740 | positive regulation of interleukin-17 production                                 | 4.61E-04 | 1.30E-02 | 7.01 (15592,14,794,5)     |
| GO:0044770 | cell cycle phase transition                                                      | 4.61E-04 | 1.30E-02 | 2.58 (15592,122,794,16)   |
| GO:0042130 | negative regulation of T cell proliferation                                      | 4.68E-04 | 1.32E-02 | 3.51 (15592,56,794,10)    |
| GO:0071900 | regulation of protein serine/threonine kinase activity                           | 4.83E-04 | 1.36E-02 | 1.80 (15592,393,794,36)   |
| GO:0032652 | regulation of interleukin-1 production                                           | 4.86E-04 | 1.37E-02 | 3.06 (15592,77,794,12)    |
| GO:0032813 | tumor necrosis factor receptor superfamily binding                               | 9.44E-05 | 1.39E-02 | 4.65 (15592,38,794,9)     |
| GO:0002865 | negative regulation of acute inflammatory response to antigenic stimulus         | 5.06E-04 | 1.40E-02 | 14.73 (15592,4,794,3)     |
| GO:0016043 | cellular component organization                                                  | 5.03E-04 | 1.41E-02 | 1.19 (15592,4143,794,252) |
| GO:0002431 | Fc receptor mediated stimulatory signaling pathway                               | 5.06E-04 | 1.41E-02 | 14.73 (15592,4,794,3)     |
| GO:0002636 | positive regulation of germinal center formation                                 | 5.06E-04 | 1.41E-02 | 14.73 (15592,4,794,3)     |
| GO:0045578 | negative regulation of B cell differentiation                                    | 5.06E-04 | 1.41E-02 | 14.73 (15592,4,794,3)     |
| GO:2000410 | regulation of thymocyte migration                                                | 5.06E-04 | 1.41E-02 | 14.73 (15592,4,794,3)     |
| GO:2000566 | positive regulation of CD8-positive, alpha-beta T cell proliferation             | 5.06E-04 | 1.42E-02 | 14.73 (15592,4,794,3)     |
| GO:0043548 | phosphatidylinositol 3-kinase binding                                            | 9.44E-05 | 1.44E-02 | 4.65 (15592,38,794,9)     |
| GO:0045595 | regulation of cell differentiation                                               | 5.23E-04 | 1.45E-02 | 1.35 (15592,1645,794,113) |
| GO:0044877 | protein-containing complex binding                                               | 9.34E-05 | 1.47E-02 | 1.50 (15592,1127,794,86)  |
| GO:0030554 | adenyl nucleotide binding                                                        | 9.04E-05 | 1.48E-02 | 1.46 (15592,1306,794,97)  |
| GO:0002200 | somatic diversification of immune receptors                                      | 5.46E-04 | 1.51E-02 | 4.13 (15592,38,794,8)     |
| GO:1901992 | positive regulation of mitotic cell cycle phase transition                       | 5.48E-04 | 1.51E-02 | 3.02 (15592,78,794,12)    |
| GO:0021700 | developmental maturation                                                         | 5.50E-04 | 1.51E-02 | 2.32 (15592,161,794,19)   |
| GO:0050729 | positive regulation of inflammatory response                                     | 5.53E-04 | 1.52E-02 | 2.53 (15592,124,794,16)   |
| GO:0009615 | response to virus                                                                | 5.63E-04 | 1.54E-02 | 2.21 (15592,187,794,21)   |
| GO:0051050 | positive regulation of transport                                                 | 5.85E-04 | 1.60E-02 | 1.48 (15592,944,794,71)   |
| GO:0022408 | negative regulation of cell-cell adhesion                                        | 5.94E-04 | 1.62E-02 | 2.30 (15592,162,794,19)   |
| GO:0045121 | membrane raft                                                                    | 2.50E-04 | 1.67E-02 | 1.95 (15592,323,794,32)   |
| GO:2000406 | positive regulation of T cell migration                                          | 6.29E-04 | 1.71E-02 | 4.58 (15592,30,794,7)     |
| GO:0090218 | positive regulation of lipid kinase activity                                     | 6.29E-04 | 1.71E-02 | 4.58 (15592,30,794,7)     |
| GO:0042104 | positive regulation of activated T cell proliferation                            | 6.32E-04 | 1.71E-02 | 5.36 (15592,22,794,6)     |
| GO:0098857 | membrane microdomain                                                             | 2.65E-04 | 1.71E-02 | 1.94 (15592,324,794,32)   |
| GO:0002456 | T cell mediated immunity                                                         | 6.29E-04 | 1.72E-02 | 4.58 (15592,30,794,7)     |
| GO:0045408 | regulation of interleukin-6 biosynthetic process                                 | 6.32E-04 | 1.72E-02 | 5.36 (15592,22,794,6)     |
| GO:1901570 | fatty acid derivative biosynthetic process                                       | 6.57E-04 | 1.78E-02 | 4.03 (15592,39,794,8)     |
| GO:0006260 | DNA replication                                                                  | 6.61E-04 | 1.78E-02 | 2.49 (15592,126,794,16)   |
| GO:0007076 | mitotic chromosome condensation                                                  | 6.62E-04 | 1.78E-02 | 6.55 (15592,15,794,5)     |
| GO:0042981 | regulation of apoptotic process                                                  | 6.79E-04 | 1.82E-02 | 1.38 (15592,1349,794,95)  |
| GO:0033004 | negative regulation of mast cell activation                                      | 6.84E-04 | 1.82E-02 | 8.73 (15592,9,794,4)      |
| GO:0002885 | positive regulation of hypersensitivity                                          | 6.84E-04 | 1.82E-02 | 8.73 (15592,9,794,4)      |
| GO:0051223 | regulation of protein transport                                                  | 6.85E-04 | 1.82E-02 | 1.59 (15592,629,794,51)   |
| GO:0045835 | negative regulation of meiotic nuclear division                                  | 6.84E-04 | 1.83E-02 | 8.73 (15592,9,794,4)      |
| GO:0036037 | CD8-positive, alpha-beta T cell activation                                       | 6.84E-04 | 1.83E-02 | 8.73 (15592,9,794,4)      |
| GO:0042590 | antigen processing and presentation of exogenous peptide antigen via MHC class I | 6.84E-04 | 1.83E-02 | 8.73 (15592,9,794,4)      |
| GO:0002634 | regulation of germinal center formation                                          | 6.84E-04 | 1.84E-02 | 8.73 (15592,9,794,4)      |
| GO:0071840 | cellular component organization or biogenesis                                    | 7.01E-04 | 1.86E-02 | 1.19 (15592,4221,794,255) |
| GO:0033674 | positive regulation of kinase activity                                           | 7.41E-04 | 1.96E-02 | 1.73 (15592,432,794,38)   |
| GO:0000779 | condensed chromosome, centromeric region                                         | 3.58E-04 | 1.98E-02 | 5.89 (15592,20,794,6)     |
| GO:0090087 | regulation of peptide transport                                                  | 7.51E-04 | 1.99E-02 | 1.57 (15592,663,794,53)   |
| GO:0044421 | extracellular region part                                                        | 3.53E-04 | 2.01E-02 | 1.40 (15592,1407,794,100) |
| GO:0060401 | cytosolic calcium ion transport                                                  | 7.69E-04 | 2.02E-02 | 3.09 (15592,70,794,11)    |
| GO:0051279 | regulation of release of sequestered calcium ion into cytosol                    | 7.69E-04 | 2.03E-02 | 3.09 (15592,70,794,11)    |
| GO:0005764 | lysosome                                                                         | 3.51E-04 | 2.06E-02 | 1.85 (15592,372,794,35)   |
| GO:0051480 | regulation of cytosolic calcium ion concentration                                | 8.03E-04 | 2.11E-02 | 1.94 (15592,274,794,27)   |
| GO:0032703 | negative regulation of interleukin-2 production                                  | 8.19E-04 | 2.13E-02 | 5.12 (15592,23,794,6)     |
| GO:0003779 | actin binding                                                                    | 1.50E-04 | 2.13E-02 | 1.89 (15592,384,794,37)   |
| GO:0000323 | lytic vacuole                                                                    | 3.51E-04 | 2.13E-02 | 1.85 (15592,372,794,35)   |
| GO:0009968 | negative regulation of signal transduction                                       | 8.17E-04 | 2.14E-02 | 1.44 (15592,1038,794,76)  |
| GO:1900274 | regulation of phospholipase C activity                                           | 8.19E-04 | 2.14E-02 | 5.12 (15592,23,794,6)     |
| GO:0002335 | mature B cell differentiation                                                    | 8.19E-04 | 2.14E-02 | 5.12 (15592,23,794,6)     |
| GO:0034113 | heterotypic cell-cell adhesion                                                   | 8.19E-04 | 2.14E-02 | 5.12 (15592,23,794,6)     |
| GO:1901700 | response to oxygen-containing compound                                           | 8.29E-04 | 2.16E-02 | 1.45 (15592,989,794,73)   |
| GO:0005884 | actin filament                                                                   | 3.46E-04 | 2.16E-02 | 3.00 (15592,85,794,13)    |
| GO:0098589 | membrane region                                                                  | 4.08E-04 | 2.19E-02 | 1.89 (15592,332,794,32)   |
| GO:0000910 | cytokinesis                                                                      | 8.69E-04 | 2.26E-02 | 3.04 (15592,71,794,11)    |
| GO:0043410 | positive regulation of MAPK cascade                                              | 8.79E-04 | 2.28E-02 | 1.70 (15592,451,794,39)   |
| GO:0010941 | regulation of cell death                                                         | 9.12E-04 | 2.36E-02 | 1.35 (15592,1498,794,103) |
| GO:0045410 | positive regulation of interleukin-6 biosynthetic process                        | 9.23E-04 | 2.38E-02 | 6.14 (15592,16,794,5)     |
| GO:2001185 | regulation of CD8-positive, alpha-beta T cell activation                         | 9.23E-04 | 2.38E-02 | 6.14 (15592,16,794,5)     |
| GO:0002863 | positive regulation of inflammatory response to antigenic stimulus               | 9.23E-04 | 2.38E-02 | 6.14 (15592,16,794,5)     |
| GO:0002639 | positive regulation of immunoglobulin production                                 | 9.33E-04 | 2.40E-02 | 3.83 (15592,41,794,8)     |
| GO:0044430 | cytoskeletal part                                                                | 4.59E-04 | 2.40E-02 | 1.40 (15592,1350,794,96)  |
| GO:0042592 | homeostatic process                                                              | 9.91E-04 | 2.54E-02 | 1.38 (15592,1280,794,90)  |
| GO:0060627 | regulation of vesicle-mediated transport                                         | 9.95E-04 | 2.55E-02 | 1.64 (15592,515,794,43)   |
| GO:0008305 | integrin complex                                                                 | 5.04E-04 | 2.57E-02 | 4.74 (15592,29,794,7)     |
| GO:0098562 | cytoplasmic side of membrane                                                     | 5.25E-04 | 2.60E-02 | 3.22 (15592,67,794,11)    |
| GO:0061134 | peptidase regulator activity                                                     | 1.95E-04 | 2.68E-02 | 2.38 (15592,173,794,21)   |
| GO:0019899 | enzyme binding                                                                   | 2.01E-04 | 2.68E-02 | 1.32 (15592,2121,794,143) |
| GO:0004866 | endopeptidase inhibitor activity                                                 | 2.24E-04 | 2.90E-02 | 2.56 (15592,138,794,18)   |
| GO:0005126 | cytokine receptor binding                                                        | 2.34E-04 | 2.95E-02 | 2.13 (15592,240,794,26)   |
| GO:0005102 | signaling receptor binding                                                       | 3.28E-04 | 4.01E-02 | 1.41 (15592,1320,794,95)  |
| GO:0061135 | endopeptidase regulator activity                                                 | 3.80E-04 | 4.41E-02 | 2.45 (15592,144,794,18)   |
| GO:0000166 | nucleotide binding                                                               | 4.14E-04 | 4.45E-02 | 1.34 (15592,1807,794,123) |
| GO:0042287 | MHC protein binding                                                              | 4.00E-04 | 4.52E-02 | 4.91 (15592,28,794,7)     |
| GO:0030414 | peptidase inhibitor activity                                                     | 3.80E-04 | 4.53E-02 | 2.45 (15592,144,794,18)   |
| GO:1901265 | nucleoside phosphate binding                                                     | 4.14E-04 | 4.56E-02 | 1.34 (15592,1807,794,123) |
| GO:0000922 | spindle pole                                                                     | 9.53E-04 | 4.61E-02 | 2.59 (15592,106,794,14)   |
| GO:0016773 | phosphotransferase activity, alcohol group as acceptor                           | 4.76E-04 | 4.99E-02 | 1.62 (15592,619,794,51)   |

12 week old NOD islets: GO terms associated with genes upregulated by ≥3-fold

| GO term | Description | P-value | FDR q-value | Enrichment (N, B, n, b)* |
|---------|-------------|---------|-------------|--------------------------|
|---------|-------------|---------|-------------|--------------------------|

|            |                                                                         |          |          |                           |
|------------|-------------------------------------------------------------------------|----------|----------|---------------------------|
| GO:0051707 | response to other organism                                              | 5.36E-12 | 2.70E-08 | 3.36 (15592,502,388,42)   |
| GO:0009607 | response to biotic stimulus                                             | 4.42E-12 | 3.34E-08 | 2.97 (15592,676,388,50)   |
| GO:0009617 | response to bacterium                                                   | 1.38E-11 | 5.22E-08 | 4.21 (15592,296,388,31)   |
| GO:0005615 | extracellular space                                                     | 3.28E-11 | 6.34E-08 | 2.35 (15592,1144,388,67)  |
| GO:0043207 | response to external biotic stimulus                                    | 4.40E-12 | 6.65E-08 | 3.02 (15592,653,388,49)   |
| GO:0009605 | response to external stimulus                                           | 5.88E-11 | 1.78E-07 | 2.36 (15592,1106,388,65)  |
| GO:0044421 | extracellular region part                                               | 3.86E-10 | 3.73E-07 | 2.11 (15592,1407,388,74)  |
| GO:0019730 | antimicrobial humoral response                                          | 1.04E-09 | 2.63E-06 | 9.17 (15592,57,388,13)    |
| GO:0006955 | immune response                                                         | 2.44E-09 | 5.27E-06 | 2.72 (15592,635,388,43)   |
| GO:0061844 | antimicrobial humoral immune response mediated by antimicrobial peptide | 9.34E-09 | 1.77E-05 | 9.82 (15592,45,388,11)    |
| GO:0005576 | extracellular region                                                    | 4.02E-08 | 2.60E-05 | 2.04 (15592,1243,388,63)  |
| GO:0006952 | defense response                                                        | 1.79E-08 | 3.00E-05 | 2.42 (15592,781,388,47)   |
| GO:0051704 | multi-organism process                                                  | 2.74E-08 | 4.14E-05 | 2.41 (15592,766,388,46)   |
| GO:0042742 | defense response to bacterium                                           | 5.79E-08 | 7.29E-05 | 4.44 (15592,172,388,19)   |
| GO:0098542 | defense response to other organism                                      | 5.53E-08 | 7.60E-05 | 3.31 (15592,328,388,27)   |
| GO:0002251 | organ or tissue specific immune response                                | 1.44E-07 | 1.68E-04 | 12.36 (15592,26,388,8)    |
| GO:0051673 | membrane disruption in other organism                                   | 1.86E-07 | 2.01E-04 | 20.09 (15592,12,388,6)    |
| GO:0032879 | regulation of localization                                              | 3.06E-07 | 3.09E-04 | 1.62 (15592,2480,388,100) |
| GO:0042221 | response to chemical                                                    | 3.93E-07 | 3.12E-04 | 1.67 (15592,2165,388,90)  |
| GO:0048519 | negative regulation of biological process                               | 3.36E-07 | 3.17E-04 | 1.41 (15592,4404,388,155) |
| GO:0010033 | response to organic substance                                           | 3.90E-07 | 3.27E-04 | 1.77 (15592,1751,388,77)  |
| GO:0051239 | regulation of multicellular organismal process                          | 3.73E-07 | 3.32E-04 | 1.58 (15592,2724,388,107) |
| GO:0071219 | cellular response to molecule of bacterial origin                       | 4.96E-07 | 3.57E-04 | 4.53 (15592,142,388,16)   |
| GO:0030545 | receptor regulator activity                                             | 8.17E-08 | 3.60E-04 | 3.08 (15592,378,388,29)   |
| GO:0002376 | immune system process                                                   | 4.87E-07 | 3.68E-04 | 1.97 (15592,1185,388,58)  |
| GO:0080134 | regulation of response to stress                                        | 5.94E-07 | 3.90E-04 | 1.97 (15592,1163,388,57)  |
| GO:0031347 | regulation of defense response                                          | 5.84E-07 | 4.01E-04 | 2.55 (15592,536,388,34)   |
| GO:0071216 | cellular response to biotic stimulus                                    | 7.21E-07 | 4.54E-04 | 4.17 (15592,164,388,17)   |
| GO:0048018 | receptor ligand activity                                                | 2.46E-07 | 5.43E-04 | 3.07 (15592,353,388,27)   |
| GO:0002237 | response to molecule of bacterial origin                                | 9.79E-07 | 5.92E-04 | 3.56 (15592,226,388,20)   |
| GO:0071222 | cellular response to lipopolysaccharide                                 | 1.12E-06 | 6.24E-04 | 4.53 (15592,133,388,15)   |
| GO:1902531 | regulation of intracellular signal transduction                         | 1.10E-06 | 6.37E-04 | 1.81 (15592,1486,388,67)  |
| GO:0032496 | response to lipopolysaccharide                                          | 1.22E-06 | 6.59E-04 | 3.65 (15592,209,388,19)   |
| GO:0002385 | mucosal immune response                                                 | 1.34E-06 | 7.00E-04 | 11.72 (15592,24,388,7)    |
| GO:0048583 | regulation of response to stimulus                                      | 1.83E-06 | 9.24E-04 | 1.49 (15592,3193,388,118) |
| GO:0040012 | regulation of locomotion                                                | 2.06E-06 | 1.00E-03 | 2.06 (15592,919,388,47)   |
| GO:0005102 | signaling receptor binding                                              | 7.63E-07 | 1.12E-03 | 1.89 (15592,1320,388,62)  |
| GO:0048523 | negative regulation of cellular process                                 | 2.42E-06 | 1.14E-03 | 1.41 (15592,3992,388,140) |
| GO:0048518 | positive regulation of biological process                               | 2.86E-06 | 1.31E-03 | 1.34 (15592,5036,388,168) |
| GO:0019731 | antibacterial humoral response                                          | 3.23E-06 | 1.44E-03 | 10.42 (15592,27,388,7)    |
| GO:0005125 | cytokine activity                                                       | 1.48E-06 | 1.64E-03 | 4.18 (15592,154,388,16)   |
| GO:0043408 | regulation of MAPK cascade                                              | 4.76E-06 | 2.05E-03 | 2.25 (15592,642,388,36)   |
| GO:0005126 | cytokine receptor binding                                               | 2.50E-06 | 2.20E-03 | 3.35 (15592,240,388,20)   |
| GO:0050896 | response to stimulus                                                    | 6.09E-06 | 2.56E-03 | 1.40 (15592,3912,388,136) |
| GO:1901700 | response to oxygen-containing compound                                  | 6.66E-06 | 2.65E-03 | 1.95 (15592,989,388,48)   |
| GO:0042044 | fluid transport                                                         | 6.59E-06 | 2.69E-03 | 12.06 (15592,20,388,6)    |
| GO:2000145 | regulation of cell motility                                             | 6.99E-06 | 2.71E-03 | 2.04 (15592,847,388,43)   |
| GO:0051240 | positive regulation of multicellular organismal process                 | 7.51E-06 | 2.84E-03 | 1.70 (15592,1635,388,69)  |
| GO:0045087 | innate immune response                                                  | 8.29E-06 | 2.91E-03 | 2.82 (15592,328,388,23)   |
| GO:0006959 | humoral immune response                                                 | 8.26E-06 | 2.97E-03 | 4.39 (15592,119,388,13)   |
| GO:0010646 | regulation of cell communication                                        | 8.21E-06 | 3.03E-03 | 1.50 (15592,2767,388,103) |
| GO:0002227 | innate immune response in mucosa                                        | 9.03E-06 | 3.10E-03 | 11.48 (15592,21,388,6)    |
| GO:0051046 | regulation of secretion                                                 | 9.28E-06 | 3.12E-03 | 2.08 (15592,772,388,40)   |
| GO:0023051 | regulation of signaling                                                 | 1.04E-05 | 3.42E-03 | 1.49 (15592,2782,388,103) |
| GO:0009966 | regulation of signal transduction                                       | 1.08E-05 | 3.48E-03 | 1.53 (15592,2409,388,92)  |
| GO:0050829 | defense response to Gram-negative bacterium                             | 1.21E-05 | 3.80E-03 | 6.24 (15592,58,388,9)     |
| GO:0048522 | positive regulation of cellular process                                 | 1.32E-05 | 4.08E-03 | 1.34 (15592,4519,388,151) |
| GO:0030334 | regulation of cell migration                                            | 1.36E-05 | 4.10E-03 | 2.03 (15592,813,388,41)   |
| GO:0042325 | regulation of phosphorylation                                           | 1.72E-05 | 5.00E-03 | 1.74 (15592,1360,388,59)  |
| GO:0033993 | response to lipid                                                       | 1.71E-05 | 5.07E-03 | 2.36 (15592,493,388,29)   |
| GO:0051270 | regulation of cellular component movement                               | 2.32E-05 | 6.62E-03 | 1.92 (15592,919,388,44)   |
| GO:1903524 | positive regulation of blood circulation                                | 2.53E-05 | 6.71E-03 | 5.09 (15592,79,388,10)    |
| GO:1903530 | regulation of secretion by cell                                         | 2.59E-05 | 6.76E-03 | 2.06 (15592,722,388,37)   |
| GO:0051047 | positive regulation of secretion                                        | 2.47E-05 | 6.78E-03 | 2.41 (15592,451,388,27)   |
| GO:0045604 | regulation of epidermal cell differentiation                            | 2.53E-05 | 6.82E-03 | 6.56 (15592,49,388,8)     |
| GO:0042045 | epithelial fluid transport                                              | 2.44E-05 | 6.83E-03 | 20.09 (15592,8,388,4)     |
| GO:0016324 | apical plasma membrane                                                  | 1.46E-05 | 7.07E-03 | 2.98 (15592,270,388,20)   |
| GO:0051241 | negative regulation of multicellular organismal process                 | 3.48E-05 | 8.76E-03 | 1.79 (15592,1145,388,51)  |
| GO:0003018 | vascular process in circulatory system                                  | 3.47E-05 | 8.90E-03 | 3.42 (15592,176,388,15)   |
| GO:0065007 | biological regulation                                                   | 3.80E-05 | 9.41E-03 | 1.17 (15592,9126,388,265) |
| GO:0019220 | regulation of phosphate metabolic process                               | 4.41E-05 | 1.07E-02 | 1.66 (15592,1500,388,62)  |
| GO:0051174 | regulation of phosphorus metabolic process                              | 4.49E-05 | 1.08E-02 | 1.66 (15592,1501,388,62)  |
| GO:0071396 | cellular response to lipid                                              | 4.71E-05 | 1.11E-02 | 2.74 (15592,293,388,20)   |
| GO:0001817 | regulation of cytokine production                                       | 5.52E-05 | 1.28E-02 | 2.15 (15592,580,388,31)   |
| GO:0080090 | regulation of primary metabolic process                                 | 5.72E-05 | 1.29E-02 | 1.31 (15592,4526,388,148) |
| GO:0045682 | regulation of epidermis development                                     | 5.67E-05 | 1.30E-02 | 5.17 (15592,70,388,9)     |
| GO:1903532 | positive regulation of secretion by cell                                | 5.85E-05 | 1.30E-02 | 2.38 (15592,422,388,25)   |
| GO:0010648 | negative regulation of cell communication                               | 5.92E-05 | 1.30E-02 | 1.77 (15592,1138,388,50)  |
| GO:0009725 | response to hormone                                                     | 6.48E-05 | 1.40E-02 | 2.42 (15592,399,388,24)   |
| GO:0023057 | negative regulation of signaling                                        | 6.62E-05 | 1.41E-02 | 1.76 (15592,1143,388,50)  |
| GO:0022600 | digestive system process                                                | 6.84E-05 | 1.44E-02 | 5.74 (15592,56,388,8)     |
| GO:0019222 | regulation of metabolic process                                         | 7.49E-05 | 1.55E-02 | 1.29 (15592,5000,388,160) |
| GO:0050708 | regulation of protein secretion                                         | 7.62E-05 | 1.56E-02 | 2.34 (15592,429,388,25)   |
| GO:0050789 | regulation of biological process                                        | 7.87E-05 | 1.59E-02 | 1.17 (15592,8652,388,252) |
| GO:0001932 | regulation of protein phosphorylation                                   | 8.33E-05 | 1.66E-02 | 1.71 (15592,1247,388,53)  |
| GO:0008610 | lipid biosynthetic process                                              | 8.81E-05 | 1.73E-02 | 2.48 (15592,356,388,22)   |
| GO:0035821 | modification of morphology or physiology of other organism              | 1.00E-04 | 1.92E-02 | 3.98 (15592,111,388,11)   |
| GO:0045088 | regulation of innate immune response                                    | 9.98E-05 | 1.93E-02 | 2.87 (15592,238,388,17)   |
| GO:1902533 | positive regulation of intracellular signal transduction                | 1.18E-04 | 2.23E-02 | 1.86 (15592,865,388,40)   |
| GO:0065008 | regulation of biological quality                                        | 1.26E-04 | 2.35E-02 | 1.39 (15592,3095,388,107) |
| GO:0050830 | defense response to Gram-positive bacterium                             | 1.34E-04 | 2.46E-02 | 4.64 (15592,78,388,9)     |
| GO:0050878 | regulation of body fluid levels                                         | 1.35E-04 | 2.46E-02 | 2.80 (15592,244,388,17)   |
| GO:0008083 | growth factor activity                                                  | 3.47E-05 | 2.55E-02 | 4.12 (15592,117,388,12)   |

|            |                                                                                      |          |          |                           |
|------------|--------------------------------------------------------------------------------------|----------|----------|---------------------------|
| GO:0042536 | negative regulation of tumor necrosis factor biosynthetic process                    | 1.47E-04 | 2.65E-02 | 24.11 (15592,5,388,3)     |
| GO:0050794 | regulation of cellular process                                                       | 1.51E-04 | 2.65E-02 | 1.17 (15592,8140,388,238) |
| GO:0031349 | positive regulation of defense response                                              | 1.51E-04 | 2.68E-02 | 2.68 (15592,270,388,18)   |
| GO:0051248 | negative regulation of protein metabolic process                                     | 1.57E-04 | 2.70E-02 | 1.80 (15592,937,388,42)   |
| GO:0003013 | circulatory system process                                                           | 1.57E-04 | 2.73E-02 | 3.00 (15592,201,388,15)   |
| GO:0009893 | positive regulation of metabolic process                                             | 1.77E-04 | 3.00E-02 | 1.38 (15592,3050,388,105) |
| GO:0070851 | growth factor receptor binding                                                       | 5.26E-05 | 3.31E-02 | 3.95 (15592,122,388,12)   |
| GO:0031325 | positive regulation of cellular metabolic process                                    | 2.05E-04 | 3.44E-02 | 1.40 (15592,2813,388,98)  |
| GO:0071347 | cellular response to interleukin-1                                                   | 2.22E-04 | 3.69E-02 | 5.63 (15592,50,388,7)     |
| GO:0002791 | regulation of peptide secretion                                                      | 2.34E-04 | 3.84E-02 | 2.18 (15592,461,388,25)   |
| GO:0016126 | sterol biosynthetic process                                                          | 2.36E-04 | 3.84E-02 | 6.70 (15592,36,388,6)     |
| GO:0048871 | multicellular organismal homeostasis                                                 | 2.44E-04 | 3.93E-02 | 3.90 (15592,103,388,10)   |
| GO:0009986 | cell surface                                                                         | 1.09E-04 | 4.21E-02 | 2.10 (15592,574,388,30)   |
| GO:0006954 | inflammatory response                                                                | 2.70E-04 | 4.25E-02 | 2.48 (15592,308,388,19)   |
| GO:0031323 | regulation of cellular metabolic process                                             | 2.70E-04 | 4.29E-02 | 1.28 (15592,4664,388,148) |
| GO:0006925 | inflammatory cell apoptotic process                                                  | 2.89E-04 | 4.46E-02 | 20.09 (15592,6,388,3)     |
| GO:0050793 | regulation of developmental process                                                  | 2.89E-04 | 4.50E-02 | 1.44 (15592,2314,388,83)  |
| GO:0035296 | regulation of tube diameter                                                          | 3.31E-04 | 4.77E-02 | 3.26 (15592,148,388,12)   |
| GO:0044057 | regulation of system process                                                         | 3.37E-04 | 4.81E-02 | 2.09 (15592,500,388,26)   |
| GO:0097746 | regulation of blood vessel diameter                                                  | 3.31E-04 | 4.82E-02 | 3.26 (15592,148,388,12)   |
| GO:0050880 | regulation of blood vessel size                                                      | 3.31E-04 | 4.86E-02 | 3.26 (15592,148,388,12)   |
| GO:0042036 | negative regulation of cytokine biosynthetic process                                 | 3.28E-04 | 4.90E-02 | 8.04 (15592,25,388,5)     |
| GO:0120161 | regulation of cold-induced thermogenesis                                             | 3.31E-04 | 4.90E-02 | 3.48 (15592,127,388,11)   |
| GO:0045823 | positive regulation of heart contraction                                             | 3.21E-04 | 4.91E-02 | 6.35 (15592,38,388,6)     |
| GO:0051246 | regulation of protein metabolic process                                              | 3.47E-04 | 4.91E-02 | 1.43 (15592,2362,388,84)  |
| GO:0035150 | regulation of tube size                                                              | 3.53E-04 | 4.93E-02 | 3.24 (15592,149,388,12)   |
| GO:0010460 | positive regulation of heart rate                                                    | 3.28E-04 | 4.95E-02 | 8.04 (15592,25,388,5)     |
| GO:0051093 | negative regulation of developmental process                                         | 3.60E-04 | 4.95E-02 | 1.76 (15592,913,388,40)   |
| GO:0048869 | cellular developmental process                                                       | 3.64E-04 | 4.96E-02 | 1.42 (15592,2470,388,87)  |
| GO:0050714 | positive regulation of protein secretion                                             | 3.58E-04 | 4.97E-02 | 2.58 (15592,265,388,17)   |
| GO:0031325 | positive regulation of cellular metabolic process                                    | 9.36E-06 | 1.33E-03 | 1.66 (15592,2813,220,66)  |
| GO:0010604 | positive regulation of macromolecule metabolic process                               | 9.03E-06 | 1.34E-03 | 1.66 (15592,2810,220,66)  |
| GO:0098742 | cell-cell adhesion via plasma-membrane adhesion molecules                            | 9.20E-06 | 1.34E-03 | 5.20 (15592,150,220,11)   |
| GO:0009891 | positive regulation of biosynthetic process                                          | 9.51E-06 | 1.34E-03 | 1.92 (15592,1697,220,46)  |
| GO:0045893 | positive regulation of transcription, DNA-templated                                  | 9.96E-06 | 1.38E-03 | 2.07 (15592,1337,220,39)  |
| GO:2000147 | positive regulation of cell motility                                                 | 9.92E-06 | 1.39E-03 | 2.95 (15592,505,220,21)   |
| GO:1903508 | positive regulation of nucleic acid-templated transcription                          | 1.05E-05 | 1.44E-03 | 2.06 (15592,1340,220,39)  |
| GO:1902680 | positive regulation of RNA biosynthetic process                                      | 1.07E-05 | 1.45E-03 | 2.06 (15592,1341,220,39)  |
| GO:0072300 | positive regulation of metanephric glomerulus development                            | 1.10E-05 | 1.48E-03 | 53.15 (15592,4,220,3)     |
| GO:0019222 | regulation of metabolic process                                                      | 1.11E-05 | 1.48E-03 | 1.43 (15592,5000,220,101) |
| GO:0019220 | regulation of phosphate metabolic process                                            | 1.16E-05 | 1.54E-03 | 1.98 (15592,1500,220,42)  |
| GO:0051174 | regulation of phosphorus metabolic process                                           | 1.18E-05 | 1.56E-03 | 1.98 (15592,1501,220,42)  |
| GO:0001932 | regulation of protein phosphorylation                                                | 1.20E-05 | 1.56E-03 | 2.10 (15592,1247,220,37)  |
| GO:0008201 | heparin binding                                                                      | 3.84E-06 | 1.69E-03 | 5.69 (15592,137,220,11)   |
| GO:0033627 | cell adhesion mediated by integrin                                                   | 1.46E-05 | 1.89E-03 | 15.41 (15592,23,220,5)    |
| GO:0005583 | fibrillar collagen trimer                                                            | 1.18E-05 | 1.90E-03 | 25.77 (15592,11,220,4)    |
| GO:0051272 | positive regulation of cellular component movement                                   | 1.54E-05 | 1.97E-03 | 2.86 (15592,520,220,21)   |
| GO:0008285 | negative regulation of cell proliferation                                            | 1.62E-05 | 2.05E-03 | 2.69 (15592,606,220,23)   |
| GO:0045581 | negative regulation of T cell differentiation                                        | 1.63E-05 | 2.05E-03 | 10.90 (15592,39,220,6)    |
| GO:0031345 | negative regulation of cell projection organization                                  | 1.65E-05 | 2.06E-03 | 4.48 (15592,190,220,12)   |
| GO:0060255 | regulation of macromolecule metabolic process                                        | 1.68E-05 | 2.08E-03 | 1.45 (15592,4590,220,94)  |
| GO:0090179 | planar cell polarity pathway involved in neural tube closure                         | 1.75E-05 | 2.13E-03 | 23.62 (15592,12,220,4)    |
| GO:0030278 | regulation of ossification                                                           | 1.74E-05 | 2.14E-03 | 4.45 (15592,191,220,12)   |
| GO:0010977 | negative regulation of neuron projection development                                 | 1.80E-05 | 2.17E-03 | 4.84 (15592,161,220,11)   |
| GO:0060071 | Wnt signaling pathway, planar cell polarity pathway                                  | 1.83E-05 | 2.19E-03 | 14.77 (15592,24,220,5)    |
| GO:0030512 | negative regulation of transforming growth factor beta receptor signaling pathway    | 1.85E-05 | 2.20E-03 | 8.41 (15592,59,220,7)     |
| GO:0043393 | regulation of protein binding                                                        | 1.90E-05 | 2.24E-03 | 4.09 (15592,225,220,13)   |
| GO:0007169 | transmembrane receptor protein tyrosine kinase signaling pathway                     | 1.98E-05 | 2.32E-03 | 3.60 (15592,295,220,15)   |
| GO:0048754 | branching morphogenesis of an epithelial tube                                        | 2.16E-05 | 2.51E-03 | 5.25 (15592,135,220,10)   |
| GO:0051960 | regulation of nervous system development                                             | 2.19E-05 | 2.53E-03 | 2.27 (15592,937,220,30)   |
| GO:0050789 | regulation of biological process                                                     | 2.23E-05 | 2.55E-03 | 1.25 (15592,8652,220,152) |
| GO:0030111 | regulation of Wnt signaling pathway                                                  | 2.27E-05 | 2.58E-03 | 3.77 (15592,263,220,14)   |
| GO:1903845 | negative regulation of cellular response to transforming growth factor beta stimulus | 2.31E-05 | 2.61E-03 | 8.13 (15592,61,220,7)     |
| GO:0009968 | negative regulation of signal transduction                                           | 2.40E-05 | 2.69E-03 | 2.18 (15592,1038,220,32)  |
| GO:0016342 | catenin complex                                                                      | 1.83E-05 | 2.72E-03 | 14.77 (15592,24,220,5)    |
| GO:0050767 | regulation of neurogenesis                                                           | 2.61E-05 | 2.87E-03 | 2.33 (15592,851,220,28)   |
| GO:0030545 | receptor regulator activity                                                          | 7.16E-06 | 2.87E-03 | 3.37 (15592,378,220,18)   |
| GO:0017147 | Wnt-protein binding                                                                  | 8.50E-06 | 2.88E-03 | 12.15 (15592,35,220,6)    |
| GO:0050768 | negative regulation of neurogenesis                                                  | 2.60E-05 | 2.89E-03 | 3.52 (15592,302,220,15)   |
| GO:0003700 | DNA-binding transcription factor activity                                            | 7.86E-06 | 2.89E-03 | 2.49 (15592,797,220,28)   |
| GO:0072298 | regulation of metanephric glomerulus development                                     | 2.71E-05 | 2.97E-03 | 42.52 (15592,5,220,3)     |
| GO:0003002 | regionalization                                                                      | 2.74E-05 | 2.98E-03 | 3.95 (15592,233,220,13)   |
| GO:0000902 | cell morphogenesis                                                                   | 2.87E-05 | 3.09E-03 | 3.94 (15592,234,220,13)   |
| GO:0045668 | negative regulation of osteoblast differentiation                                    | 2.91E-05 | 3.11E-03 | 9.89 (15592,43,220,6)     |
| GO:0045995 | regulation of embryonic development                                                  | 3.16E-05 | 3.36E-03 | 5.64 (15592,113,220,9)    |
| GO:0001657 | ureteric bud development                                                             | 3.32E-05 | 3.51E-03 | 9.66 (15592,44,220,6)     |
| GO:0048018 | receptor ligand activity                                                             | 1.12E-05 | 3.53E-03 | 3.41 (15592,353,220,17)   |
| GO:0045667 | regulation of osteoblast differentiation                                             | 3.38E-05 | 3.55E-03 | 5.60 (15592,114,220,9)    |
| GO:0042325 | regulation of phosphorylation                                                        | 3.44E-05 | 3.58E-03 | 1.98 (15592,1360,220,38)  |
| GO:0090178 | regulation of establishment of planar polarity involved in neural tube closure       | 3.46E-05 | 3.58E-03 | 20.25 (15592,14,220,4)    |
| GO:0050730 | regulation of peptidyl-tyrosine phosphorylation                                      | 3.57E-05 | 3.65E-03 | 3.86 (15592,239,220,13)   |
| GO:0010557 | positive regulation of macromolecule biosynthetic process                            | 3.56E-05 | 3.66E-03 | 1.89 (15592,1572,220,42)  |
| GO:0045165 | cell fate commitment                                                                 | 3.77E-05 | 3.83E-03 | 4.92 (15592,144,220,10)   |
| GO:0048870 | cell motility                                                                        | 4.17E-05 | 4.20E-03 | 2.36 (15592,780,220,26)   |
| GO:0045620 | negative regulation of lymphocyte differentiation                                    | 4.31E-05 | 4.28E-03 | 9.24 (15592,46,220,6)     |
| GO:0051254 | positive regulation of RNA metabolic process                                         | 4.29E-05 | 4.29E-03 | 1.94 (15592,1426,220,39)  |
| GO:0045664 | regulation of neuron differentiation                                                 | 4.41E-05 | 4.35E-03 | 2.46 (15592,691,220,24)   |
| GO:0032963 | collagen metabolic process                                                           | 4.88E-05 | 4.79E-03 | 9.05 (15592,47,220,6)     |
| GO:0045937 | positive regulation of phosphate metabolic process                                   | 5.05E-05 | 4.90E-03 | 2.17 (15592,980,220,30)   |
| GO:0010562 | positive regulation of phosphorus metabolic process                                  | 5.05E-05 | 4.93E-03 | 2.17 (15592,980,220,30)   |
| GO:0048407 | platelet-derived growth factor binding                                               | 1.75E-05 | 5.13E-03 | 23.62 (15592,12,220,4)    |
| GO:0032808 | lacrimal gland development                                                           | 5.37E-05 | 5.17E-03 | 35.44 (15592,6,220,3)     |
| GO:0010811 | positive regulation of cell-substrate adhesion                                       | 5.42E-05 | 5.18E-03 | 5.27 (15592,121,220,9)    |

|            |                                                                             |          |          |                           |
|------------|-----------------------------------------------------------------------------|----------|----------|---------------------------|
| GO:0072164 | mesonephric tubule development                                              | 5.51E-05 | 5.24E-03 | 8.86 (15592,48,220,6)     |
| GO:0098609 | cell-cell adhesion                                                          | 5.63E-05 | 5.25E-03 | 3.29 (15592,323,220,15)   |
| GO:0016055 | Wnt signaling pathway                                                       | 5.57E-05 | 5.26E-03 | 3.96 (15592,215,220,12)   |
| GO:0048468 | cell development                                                            | 5.63E-05 | 5.28E-03 | 2.55 (15592,612,220,22)   |
| GO:0034329 | cell junction assembly                                                      | 5.78E-05 | 5.36E-03 | 5.23 (15592,122,220,9)    |
| GO:0045935 | positive regulation of nucleobase-containing compound metabolic process     | 5.84E-05 | 5.39E-03 | 1.85 (15592,1606,220,42)  |
| GO:0061138 | morphogenesis of a branching epithelium                                     | 5.98E-05 | 5.44E-03 | 4.66 (15592,152,220,10)   |
| GO:0010648 | negative regulation of cell communication                                   | 5.96E-05 | 5.46E-03 | 2.06 (15592,1138,220,33)  |
| GO:0051961 | negative regulation of nervous system development                           | 6.04E-05 | 5.47E-03 | 3.27 (15592,325,220,15)   |
| GO:0072163 | mesonephric epithelium development                                          | 6.21E-05 | 5.59E-03 | 8.68 (15592,49,220,6)     |
| GO:0017015 | regulation of transforming growth factor beta receptor signaling pathway    | 6.32E-05 | 5.65E-03 | 5.91 (15592,96,220,8)     |
| GO:0023057 | negative regulation of signaling                                            | 6.49E-05 | 5.77E-03 | 2.05 (15592,1143,220,33)  |
| GO:0060070 | canonical Wnt signaling pathway                                             | 6.85E-05 | 6.02E-03 | 6.89 (15592,72,220,7)     |
| GO:0040011 | locomotion                                                                  | 6.83E-05 | 6.04E-03 | 2.25 (15592,851,220,27)   |
| GO:0001822 | kidney development                                                          | 6.98E-05 | 6.10E-03 | 5.10 (15592,125,220,9)    |
| GO:1905114 | cell surface receptor signaling pathway involved in cell-cell signaling     | 7.27E-05 | 6.27E-03 | 3.85 (15592,221,220,12)   |
| GO:0006928 | movement of cell or subcellular component                                   | 7.23E-05 | 6.28E-03 | 2.06 (15592,1099,220,32)  |
| GO:1903844 | regulation of cellular response to transforming growth factor beta stimulus | 7.32E-05 | 6.29E-03 | 5.79 (15592,98,220,8)     |
| GO:0002009 | morphogenesis of an epithelium                                              | 7.37E-05 | 6.29E-03 | 3.39 (15592,293,220,14)   |
| GO:0051098 | regulation of binding                                                       | 7.43E-05 | 6.31E-03 | 3.06 (15592,370,220,16)   |
| GO:0045944 | positive regulation of transcription by RNA polymerase II                   | 7.49E-05 | 6.32E-03 | 2.09 (15592,1051,220,31)  |
| GO:0048701 | embryonic cranial skeleton morphogenesis                                    | 7.89E-05 | 6.55E-03 | 11.07 (15592,32,220,5)    |
| GO:0003151 | outflow tract morphogenesis                                                 | 7.81E-05 | 6.56E-03 | 8.34 (15592,51,220,6)     |
| GO:0060351 | cartilage development involved in endochondral bone morphogenesis           | 7.95E-05 | 6.56E-03 | 16.68 (15592,17,220,4)    |
| GO:0048514 | blood vessel morphogenesis                                                  | 7.87E-05 | 6.57E-03 | 5.73 (15592,99,220,8)     |
| GO:0065009 | regulation of molecular function                                            | 8.07E-05 | 6.62E-03 | 1.69 (15592,2185,220,52)  |
| GO:0007417 | central nervous system development                                          | 8.90E-05 | 7.27E-03 | 6.61 (15592,75,220,7)     |
| GO:0001763 | morphogenesis of a branching structure                                      | 9.19E-05 | 7.47E-03 | 4.43 (15592,160,220,10)   |
| GO:0001934 | positive regulation of protein phosphorylation                              | 9.52E-05 | 7.69E-03 | 2.20 (15592,868,220,27)   |
| GO:0007219 | Notch signaling pathway                                                     | 9.72E-05 | 7.82E-03 | 5.56 (15592,102,220,8)    |
| GO:0045597 | positive regulation of cell differentiation                                 | 9.79E-05 | 7.83E-03 | 2.13 (15592,967,220,29)   |
| GO:0051171 | regulation of nitrogen compound metabolic process                           | 1.01E-04 | 8.01E-03 | 1.42 (15592,4401,220,88)  |
| GO:1905276 | regulation of epithelial tube formation                                     | 1.01E-04 | 8.04E-03 | 15.75 (15592,18,220,4)    |
| GO:0031323 | regulation of cellular metabolic process                                    | 1.05E-04 | 8.27E-03 | 1.40 (15592,4664,220,92)  |
| GO:0035567 | non-canonical Wnt signaling pathway                                         | 1.07E-04 | 8.34E-03 | 10.42 (15592,34,220,5)    |
| GO:0042733 | embryonic digit morphogenesis                                               | 1.08E-04 | 8.43E-03 | 7.87 (15592,54,220,6)     |
| GO:1901342 | regulation of vasculature development                                       | 1.13E-04 | 8.74E-03 | 3.25 (15592,305,220,14)   |
| GO:0051252 | regulation of RNA metabolic process                                         | 1.16E-04 | 8.88E-03 | 1.59 (15592,2623,220,59)  |
| GO:0007507 | heart development                                                           | 1.15E-04 | 8.89E-03 | 3.67 (15592,232,220,12)   |
| GO:0031401 | positive regulation of protein modification process                         | 1.17E-04 | 8.93E-03 | 2.04 (15592,1077,220,31)  |
| GO:0090090 | negative regulation of canonical Wnt signaling pathway                      | 1.27E-04 | 9.54E-03 | 5.35 (15592,106,220,8)    |
| GO:0010629 | negative regulation of gene expression                                      | 1.27E-04 | 9.55E-03 | 1.88 (15592,1393,220,37)  |
| GO:0072215 | regulation of metanephros development                                       | 1.27E-04 | 9.56E-03 | 14.92 (15592,19,220,4)    |
| GO:0070208 | protein heterotrimerization                                                 | 1.27E-04 | 9.61E-03 | 14.92 (15592,19,220,4)    |
| GO:0060828 | regulation of canonical Wnt signaling pathway                               | 1.30E-04 | 9.65E-03 | 3.90 (15592,200,220,11)   |
| GO:0030241 | skeletal muscle myosin thick filament assembly                              | 1.47E-04 | 1.08E-02 | 26.58 (15592,8,220,3)     |
| GO:0048539 | bone marrow development                                                     | 1.47E-04 | 1.08E-02 | 26.58 (15592,8,220,3)     |
| GO:0010812 | negative regulation of cell-substrate adhesion                              | 1.47E-04 | 1.09E-02 | 7.46 (15592,57,220,6)     |
| GO:0071688 | striated muscle myosin thick filament assembly                              | 1.47E-04 | 1.09E-02 | 26.58 (15592,8,220,3)     |
| GO:0097485 | neuron projection guidance                                                  | 1.52E-04 | 1.10E-02 | 4.17 (15592,170,220,10)   |
| GO:0065007 | biological regulation                                                       | 1.53E-04 | 1.11E-02 | 1.20 (15592,9126,220,155) |
| GO:1903706 | regulation of hemopoiesis                                                   | 1.56E-04 | 1.12E-02 | 3.00 (15592,354,220,15)   |
| GO:0044331 | cell-cell adhesion mediated by cadherin                                     | 1.56E-04 | 1.12E-02 | 14.17 (15592,20,220,4)    |
| GO:0031399 | regulation of protein modification process                                  | 1.59E-04 | 1.13E-02 | 1.81 (15592,1570,220,40)  |
| GO:0090175 | regulation of establishment of planar polarity                              | 1.61E-04 | 1.14E-02 | 9.58 (15592,37,220,5)     |
| GO:0008083 | growth factor activity                                                      | 4.16E-05 | 1.15E-02 | 5.45 (15592,117,220,9)    |
| GO:0019219 | regulation of nucleobase-containing compound metabolic process              | 1.71E-04 | 1.21E-02 | 1.54 (15592,2899,220,63)  |
| GO:0071495 | cellular response to endogenous stimulus                                    | 1.77E-04 | 1.24E-02 | 2.56 (15592,527,220,19)   |
| GO:2000112 | regulation of cellular macromolecule biosynthetic process                   | 1.82E-04 | 1.27E-02 | 1.55 (15592,2785,220,61)  |
| GO:0050731 | positive regulation of peptidyl-tyrosine phosphorylation                    | 1.84E-04 | 1.27E-02 | 4.07 (15592,174,220,10)   |
| GO:0045892 | negative regulation of transcription, DNA-templated                         | 1.84E-04 | 1.27E-02 | 2.05 (15592,1003,220,29)  |
| GO:0007267 | cell-cell signaling                                                         | 1.83E-04 | 1.28E-02 | 3.28 (15592,281,220,13)   |
| GO:0008347 | glial cell migration                                                        | 1.91E-04 | 1.31E-02 | 13.50 (15592,21,220,4)    |
| GO:0046639 | negative regulation of alpha-beta T cell differentiation                    | 1.91E-04 | 1.31E-02 | 13.50 (15592,21,220,4)    |
| GO:0051216 | cartilage development                                                       | 1.97E-04 | 1.33E-02 | 5.84 (15592,85,220,7)     |
| GO:1903507 | negative regulation of nucleic acid-templated transcription                 | 1.96E-04 | 1.34E-02 | 2.04 (15592,1007,220,29)  |
| GO:0097156 | fasciculation of motor neuron axon                                          | 1.98E-04 | 1.34E-02 | 70.87 (15592,2,220,2)     |
| GO:1902679 | negative regulation of RNA biosynthetic process                             | 2.00E-04 | 1.34E-02 | 2.04 (15592,1008,220,29)  |
| GO:0002683 | negative regulation of immune system process                                | 2.05E-04 | 1.37E-02 | 2.81 (15592,404,220,16)   |
| GO:0070051 | fibrinogen binding                                                          | 5.37E-05 | 1.39E-02 | 35.44 (15592,6,220,3)     |
| GO:0031033 | myosin filament organization                                                | 2.19E-04 | 1.42E-02 | 23.62 (15592,9,220,3)     |
| GO:0060348 | bone development                                                            | 2.14E-04 | 1.43E-02 | 6.97 (15592,61,220,6)     |
| GO:0001817 | regulation of cytokine production                                           | 2.15E-04 | 1.43E-02 | 2.44 (15592,580,220,20)   |
| GO:0040008 | regulation of growth                                                        | 2.17E-04 | 1.43E-02 | 2.38 (15592,626,220,21)   |
| GO:0045785 | positive regulation of cell adhesion                                        | 2.18E-04 | 1.43E-02 | 2.91 (15592,365,220,15)   |
| GO:0031034 | myosin filament assembly                                                    | 2.19E-04 | 1.43E-02 | 23.62 (15592,9,220,3)     |
| GO:1901681 | sulfur compound binding                                                     | 5.83E-05 | 1.43E-02 | 3.94 (15592,216,220,12)   |
| GO:0010556 | regulation of macromolecule biosynthetic process                            | 2.26E-04 | 1.47E-02 | 1.53 (15592,2867,220,62)  |
| GO:0007165 | signal transduction                                                         | 2.31E-04 | 1.49E-02 | 1.50 (15592,3112,220,66)  |
| GO:0042327 | positive regulation of phosphorylation                                      | 2.33E-04 | 1.50E-02 | 2.09 (15592,917,220,27)   |
| GO:0046872 | metal ion binding                                                           | 6.48E-05 | 1.50E-02 | 1.56 (15592,3045,220,67)  |
| GO:0007156 | homophilic cell adhesion via plasma membrane adhesion molecules             | 2.44E-04 | 1.56E-02 | 5.64 (15592,88,220,7)     |
| GO:0023052 | signaling                                                                   | 2.55E-04 | 1.63E-02 | 3.01 (15592,330,220,14)   |
| GO:0034332 | adherens junction organization                                              | 2.56E-04 | 1.63E-02 | 6.75 (15592,63,220,6)     |
| GO:0043169 | cation binding                                                              | 7.39E-05 | 1.63E-02 | 1.55 (15592,3118,220,68)  |
| GO:0031326 | regulation of cellular biosynthetic process                                 | 2.64E-04 | 1.67E-02 | 1.51 (15592,3004,220,64)  |
| GO:0048568 | embryonic organ development                                                 | 2.66E-04 | 1.68E-02 | 4.28 (15592,149,220,9)    |
| GO:0033002 | muscle cell proliferation                                                   | 2.77E-04 | 1.73E-02 | 12.33 (15592,23,220,4)    |
| GO:0071230 | cellular response to amino acid stimulus                                    | 2.79E-04 | 1.74E-02 | 6.64 (15592,64,220,6)     |
| GO:0010975 | regulation of neuron projection development                                 | 2.83E-04 | 1.76E-02 | 2.46 (15592,547,220,19)   |
| GO:0080090 | regulation of primary metabolic process                                     | 2.89E-04 | 1.79E-02 | 1.38 (15592,4526,220,88)  |
| GO:0004714 | transmembrane receptor protein tyrosine kinase activity                     | 8.73E-05 | 1.83E-02 | 8.18 (15592,52,220,6)     |
| GO:0060742 | epithelial cell differentiation involved in prostate gland development      | 3.09E-04 | 1.87E-02 | 21.26 (15592,10,220,3)    |

|            |                                                                                    |          |          |                           |
|------------|------------------------------------------------------------------------------------|----------|----------|---------------------------|
| GO:0010605 | negative regulation of macromolecule metabolic process                             | 3.04E-04 | 1.88E-02 | 1.63 (15592,2128,220,49)  |
| GO:0003149 | membranous septum morphogenesis                                                    | 3.09E-04 | 1.88E-02 | 21.26 (15592,10,220,3)    |
| GO:0072216 | positive regulation of metanephros development                                     | 3.09E-04 | 1.88E-02 | 21.26 (15592,10,220,3)    |
| GO:0010838 | positive regulation of keratinocyte proliferation                                  | 3.09E-04 | 1.89E-02 | 21.26 (15592,10,220,3)    |
| GO:0009952 | anterior/posterior pattern specification                                           | 3.09E-04 | 1.90E-02 | 4.20 (15592,152,220,9)    |
| GO:0010771 | negative regulation of cell morphogenesis involved in differentiation              | 3.21E-04 | 1.93E-02 | 5.39 (15592,92,220,7)     |
| GO:0051781 | positive regulation of cell division                                               | 3.31E-04 | 1.98E-02 | 6.44 (15592,66,220,6)     |
| GO:0035108 | limb morphogenesis                                                                 | 3.43E-04 | 2.04E-02 | 5.33 (15592,93,220,7)     |
| GO:0035107 | appendage morphogenesis                                                            | 3.43E-04 | 2.05E-02 | 5.33 (15592,93,220,7)     |
| GO:0055006 | cardiac cell development                                                           | 3.71E-04 | 2.20E-02 | 8.05 (15592,44,220,5)     |
| GO:0000122 | negative regulation of transcription by RNA polymerase II                          | 3.87E-04 | 2.28E-02 | 2.18 (15592,749,220,23)   |
| GO:0120163 | negative regulation of cold-induced thermogenesis                                  | 4.12E-04 | 2.42E-02 | 7.87 (15592,45,220,5)     |
| GO:0090193 | positive regulation of glomerulus development                                      | 4.21E-04 | 2.45E-02 | 19.33 (15592,11,220,3)    |
| GO:0097094 | craniofacial suture morphogenesis                                                  | 4.21E-04 | 2.46E-02 | 19.33 (15592,11,220,3)    |
| GO:0120161 | regulation of cold-induced thermogenesis                                           | 4.40E-04 | 2.56E-02 | 4.46 (15592,127,220,8)    |
| GO:0000981 | DNA-binding transcription factor activity, RNA polymerase II-specific              | 1.39E-04 | 2.79E-02 | 2.46 (15592,606,220,21)   |
| GO:0009889 | regulation of biosynthetic process                                                 | 4.83E-04 | 2.80E-02 | 1.48 (15592,3069,220,64)  |
| GO:0022408 | negative regulation of cell-cell adhesion                                          | 4.93E-04 | 2.84E-02 | 3.94 (15592,162,220,9)    |
| GO:0048638 | regulation of developmental growth                                                 | 5.03E-04 | 2.89E-02 | 2.81 (15592,353,220,14)   |
| GO:0010769 | regulation of cell morphogenesis involved in differentiation                       | 5.17E-04 | 2.96E-02 | 2.94 (15592,313,220,13)   |
| GO:0048762 | mesenchymal cell differentiation                                                   | 5.30E-04 | 3.01E-02 | 5.91 (15592,72,220,6)     |
| GO:0045765 | regulation of angiogenesis                                                         | 5.30E-04 | 3.02E-02 | 3.10 (15592,274,220,12)   |
| GO:0001501 | skeletal system development                                                        | 5.41E-04 | 3.06E-02 | 4.33 (15592,131,220,8)    |
| GO:0051128 | regulation of cellular component organization                                      | 5.48E-04 | 3.09E-02 | 1.57 (15592,2300,220,51)  |
| GO:0030240 | skeletal muscle thin filament assembly                                             | 5.55E-04 | 3.12E-02 | 17.72 (15592,12,220,3)    |
| GO:0032879 | regulation of localization                                                         | 5.61E-04 | 3.14E-02 | 1.54 (15592,2480,220,54)  |
| GO:0072091 | regulation of stem cell proliferation                                              | 5.71E-04 | 3.18E-02 | 5.83 (15592,73,220,6)     |
| GO:0060672 | epithelial cell morphogenesis involved in placental branching                      | 5.89E-04 | 3.23E-02 | 47.25 (15592,3,220,2)     |
| GO:0097155 | fasciculation of sensory neuron axon                                               | 5.89E-04 | 3.24E-02 | 47.25 (15592,3,220,2)     |
| GO:0061144 | alveolar secondary septum development                                              | 5.89E-04 | 3.25E-02 | 47.25 (15592,3,220,2)     |
| GO:0003219 | cardiac right ventricle formation                                                  | 5.89E-04 | 3.26E-02 | 47.25 (15592,3,220,2)     |
| GO:0034330 | cell junction organization                                                         | 5.88E-04 | 3.27E-02 | 3.84 (15592,166,220,9)    |
| GO:0030856 | regulation of epithelial cell differentiation                                      | 5.99E-04 | 3.27E-02 | 4.26 (15592,133,220,8)    |
| GO:0003208 | cardiac ventricle morphogenesis                                                    | 6.05E-04 | 3.29E-02 | 10.12 (15592,28,220,4)    |
| GO:0050794 | regulation of cellular process                                                     | 6.08E-04 | 3.30E-02 | 1.21 (15592,8140,220,139) |
| GO:0048584 | positive regulation of response to stimulus                                        | 6.14E-04 | 3.30E-02 | 1.66 (15592,1790,220,42)  |
| GO:0007411 | axon guidance                                                                      | 6.14E-04 | 3.31E-02 | 3.82 (15592,167,220,9)    |
| GO:0051129 | negative regulation of cellular component organization                             | 6.48E-04 | 3.47E-02 | 2.19 (15592,680,220,21)   |
| GO:0005518 | collagen binding                                                                   | 2.14E-04 | 3.63E-02 | 6.97 (15592,61,220,6)     |
| GO:0051253 | negative regulation of RNA metabolic process                                       | 6.97E-04 | 3.71E-02 | 1.89 (15592,1088,220,29)  |
| GO:0090171 | chondrocyte morphogenesis                                                          | 7.14E-04 | 3.71E-02 | 16.36 (15592,13,220,3)    |
| GO:0051172 | negative regulation of nitrogen compound metabolic process                         | 6.96E-04 | 3.72E-02 | 1.62 (15592,1973,220,45)  |
| GO:0003429 | growth plate cartilage chondrocyte morphogenesis                                   | 7.14E-04 | 3.72E-02 | 16.36 (15592,13,220,3)    |
| GO:0005178 | integrin binding                                                                   | 2.11E-04 | 3.72E-02 | 4.97 (15592,114,220,8)    |
| GO:0003422 | growth plate cartilage morphogenesis                                               | 7.14E-04 | 3.73E-02 | 16.36 (15592,13,220,3)    |
| GO:0043200 | response to amino acid                                                             | 7.08E-04 | 3.75E-02 | 5.60 (15592,76,220,6)     |
| GO:0003414 | chondrocyte morphogenesis involved in endochondral bone morphogenesis              | 7.14E-04 | 3.75E-02 | 16.36 (15592,13,220,3)    |
| GO:0061418 | regulation of transcription from RNA polymerase II promoter in response to hypoxia | 7.14E-04 | 3.76E-02 | 16.36 (15592,13,220,3)    |
| GO:0005515 | protein binding                                                                    | 2.05E-04 | 3.76E-02 | 1.25 (15592,7551,220,133) |
| GO:2000647 | negative regulation of stem cell proliferation                                     | 7.14E-04 | 3.77E-02 | 16.36 (15592,13,220,3)    |
| GO:0051302 | regulation of cell division                                                        | 7.28E-04 | 3.77E-02 | 4.14 (15592,137,220,8)    |
| GO:0030617 | transforming growth factor beta receptor, inhibitory cytoplasmic mediator activity | 1.98E-04 | 3.80E-02 | 70.87 (15592,2,220,2)     |
| GO:0090183 | regulation of kidney development                                                   | 7.40E-04 | 3.82E-02 | 6.95 (15592,51,220,5)     |
| GO:0018108 | peptidyl-tyrosine phosphorylation                                                  | 8.13E-04 | 4.16E-02 | 5.45 (15592,78,220,6)     |
| GO:0001525 | angiogenesis                                                                       | 8.11E-04 | 4.17E-02 | 3.14 (15592,248,220,11)   |
| GO:0005911 | cell-cell junction                                                                 | 3.24E-04 | 4.18E-02 | 2.69 (15592,421,220,16)   |
| GO:0032270 | positive regulation of cellular protein metabolic process                          | 8.31E-04 | 4.24E-02 | 1.76 (15592,1369,220,34)  |
| GO:0001527 | microfibril                                                                        | 3.09E-04 | 4.27E-02 | 21.26 (15592,10,220,3)    |
| GO:0010558 | negative regulation of macromolecule biosynthetic process                          | 8.71E-04 | 4.43E-02 | 1.82 (15592,1210,220,31)  |
| GO:0000904 | cell morphogenesis involved in differentiation                                     | 8.79E-04 | 4.46E-02 | 4.02 (15592,141,220,8)    |
| GO:0008045 | motor neuron axon guidance                                                         | 9.00E-04 | 4.52E-02 | 9.14 (15592,31,220,4)     |
| GO:1902692 | regulation of neuroblast proliferation                                             | 9.00E-04 | 4.53E-02 | 9.14 (15592,31,220,4)     |
| GO:0048739 | cardiac muscle fiber development                                                   | 8.99E-04 | 4.54E-02 | 15.19 (15592,14,220,3)    |
| GO:0120035 | regulation of plasma membrane bounded cell projection organization                 | 9.20E-04 | 4.61E-02 | 2.13 (15592,699,220,21)   |
| GO:0007043 | cell-cell junction assembly                                                        | 9.29E-04 | 4.62E-02 | 5.32 (15592,80,220,6)     |
| GO:0014910 | regulation of smooth muscle cell migration                                         | 9.29E-04 | 4.63E-02 | 5.32 (15592,80,220,6)     |
| GO:0009892 | negative regulation of metabolic process                                           | 9.55E-04 | 4.73E-02 | 1.53 (15592,2356,220,51)  |
| GO:0001837 | epithelial to mesenchymal transition                                               | 9.63E-04 | 4.74E-02 | 6.56 (15592,54,220,5)     |
| GO:0050679 | positive regulation of epithelial cell proliferation                               | 9.68E-04 | 4.75E-02 | 3.58 (15592,178,220,9)    |
| GO:0051147 | regulation of muscle cell differentiation                                          | 9.63E-04 | 4.76E-02 | 3.96 (15592,143,220,8)    |
| GO:0018212 | peptidyl-tyrosine modification                                                     | 9.92E-04 | 4.85E-02 | 5.25 (15592,81,220,6)     |

\*Enrichment (N, B, n, b) is defined as follows:

N - is the total number of genes

B - is the total number of genes associated with a specific GO term

n - is the number of genes upregulated or downregulated by  $\geq 3$ -fold

b - is the number of upregulated or downregulated genes ( $\geq 3$ -fold) in the specific GO term

Enrichment = (b/n) / (B/N)
