# Supplementary material
Source: publisher figshare collection journal article supplement (https://diabetesjournals.figshare.com/articles/dataset/_/19607322)
Supplement: Supplementary file 5 [file 2]

## Supplementary Tables:

### Supplementary Table 1: Human Islet preparations

|                | Subject 1 | Subject 2 | Subject 3 |
|----------------|-----------|-----------|-----------|
| Record ID      | R271      | R274      | R314      |
| Age of subject | 60        | 42        | 54        |
| Sex            | F         | M         | M         |
| BMI            | 25.9      | 25.2      | 26.4      |
| HbA1c          | 5.5       | n/a       | 5.1       |
| purity         | 95%       | 75%       | 90%       |

Additional information available at: <https://www.epicore.ualberta.ca/IsletCore/>

### Supplementary Table 2 – PCR primers

| Gene          | Primer  | Sequence (5' to 3')            | size (bp) |
|---------------|---------|--------------------------------|-----------|
| <i>OR51S1</i> | forward | ACCATCCTCTGGATCATTGC           | 171       |
|               | reverse | CTGTAGAAGGCAGGCTGAGG           |           |
| <i>OR5B21</i> | forward | GTCTCTGGCTTCCTCAATGC           | 158       |
|               | reverse | GCCACAAAGACCACCAACTT           |           |
| <i>OR3A2</i>  | forward | CCTCACCGTGGTTTGTCTTT           | 202       |
|               | reverse | CAGTGATCTCCTCCCCAAA            |           |
| <i>OR4D6</i>  | forward | TCTTCACTTCGTGCCTTGTG           | 153       |
|               | reverse | TGCATGGCTGACTTCATCTC           |           |
| <i>OR6C74</i> | forward | TGACGCTCCTGGTTACACTG           | 153       |
|               | reverse | TGCAGCTGCCATAAGAAATG           |           |
| <i>OR2C1</i>  | forward | AACCAAGGCATGTTCTGAC            | 202       |
|               | reverse | TGTGGGCAACAGAGACAGAG           |           |
| <i>Sry</i>    | forward | TTGTCTAGAGAGCATGGAGGGCCATGTCAA | 273       |
|               | reverse | CCACTCCTCTGTGACACTTTAGCCCTCCGA |           |

### Excel files:

**Supplementary Table 3** – Entities changed by  $\geq 5$ -fold in the islets of NOD vs. age-matched NOD.B10 mice

**Supplementary Table 4** – Significantly impacted pathways

**Supplementary Table 5**– Significantly impacted GO terms

**Supplementary Table 6** - Kolmogorov-Smirnov test for normal Gaussian distribution of data
