# Supplementary material
Source: publisher figshare collection journal article supplement (https://diabetesjournals.figshare.com/articles/dataset/_/19607322)
Supplement: Supplementary file 6 [file 2]

Supplementary Table 4: KEGG Pathways significantly associated with differentially expressed genes in the islets of NOD mice at each age (P<0.05)

| 10 day old                                               |          |
|----------------------------------------------------------|----------|
| Pathway name                                             | P-value  |
| Cocaine addiction                                        | 5.53E-04 |
| Glucagon signaling pathway                               | 6.36E-04 |
| Signaling pathways regulating pluripotency of stem cells | 7.20E-04 |
| ECM-receptor interaction                                 | 2.66E-03 |
| Proteoglycans in cancer                                  | 2.86E-03 |
| Human papillomavirus infection                           | 3.55E-03 |
| Amphetamine addiction                                    | 4.24E-03 |
| Longevity regulating pathway                             | 4.67E-03 |
| PI3K-Akt signaling pathway                               | 4.99E-03 |
| Adipocytokine signaling pathway                          | 8.51E-03 |
| Mannose type O-glycan biosynthesis                       | 1.22E-02 |
| Prostate cancer                                          | 1.34E-02 |
| Cholinergic synapse                                      | 1.34E-02 |
| Focal adhesion                                           | 1.41E-02 |
| Gastric cancer                                           | 1.42E-02 |
| Hepatocellular carcinoma                                 | 1.51E-02 |
| Insulin secretion                                        | 1.58E-02 |
| mTOR signaling pathway                                   | 1.65E-02 |
| Endocrine resistance                                     | 1.71E-02 |
| Basal cell carcinoma                                     | 1.88E-02 |
| Ras signaling pathway                                    | 2.12E-02 |
| Rap1 signaling pathway                                   | 2.31E-02 |
| MAPK signaling pathway                                   | 2.38E-02 |
| cAMP signaling pathway                                   | 2.91E-02 |
| Human T-cell leukemia virus 1 infection                  | 2.99E-02 |
| Hepatitis B                                              | 3.09E-02 |
| Amyotrophic lateral sclerosis (ALS)                      | 3.44E-02 |
| Viral carcinogenesis                                     | 3.50E-02 |
| Central carbon metabolism in cancer                      | 3.51E-02 |
| Breast cancer                                            | 3.60E-02 |
| Long-term depression                                     | 3.63E-02 |
| Folate biosynthesis                                      | 4.29E-02 |
| Melanogenesis                                            | 4.50E-02 |
| Prion diseases                                           | 4.53E-02 |
| Protein digestion and absorption                         | 4.64E-02 |

| 4 week old                                                 |          |
|------------------------------------------------------------|----------|
| Pathway name                                               | P-value  |
| Olfactory transduction                                     | 1.12E-08 |
| Antigen processing and presentation                        | 6.53E-05 |
| Fat digestion and absorption                               | 2.58E-04 |
| Glutamatergic synapse                                      | 4.11E-04 |
| Autoimmune thyroid disease                                 | 5.82E-04 |
| Cell adhesion molecules (CAMs)                             | 1.20E-03 |
| Type I diabetes mellitus                                   | 1.30E-03 |
| Endocrine and other factor-regulated calcium reabsorption  | 1.98E-03 |
| Longevity regulating pathway                               | 5.98E-03 |
| Type II diabetes mellitus                                  | 6.46E-03 |
| Necroptosis                                                | 7.67E-03 |
| Vitamin B6 metabolism                                      | 8.08E-03 |
| MAPK signaling pathway                                     | 8.74E-03 |
| Maturity onset diabetes of the young                       | 9.75E-03 |
| Glycine, serine and threonine metabolism                   | 9.75E-03 |
| Ovarian steroidogenesis                                    | 1.01E-02 |
| GABAergic synapse                                          | 1.03E-02 |
| Regulation of lipolysis in adipocytes                      | 1.25E-02 |
| Cysteine and methionine metabolism                         | 1.30E-02 |
| Cocaine addiction                                          | 1.41E-02 |
| Calcium signaling pathway                                  | 1.61E-02 |
| Neuroactive ligand-receptor interaction                    | 1.69E-02 |
| Mucin type O-glycan biosynthesis                           | 2.54E-02 |
| Allograft rejection                                        | 2.63E-02 |
| Taurine and hypotaurine metabolism                         | 2.84E-02 |
| Gastric acid secretion                                     | 2.91E-02 |
| Glycosphingolipid biosynthesis - lacto and neolacto series | 3.04E-02 |
| Morphine addiction                                         | 3.19E-02 |
| Graft-versus-host disease                                  | 3.23E-02 |
| Glycerolipid metabolism                                    | 3.27E-02 |
| Hematopoietic cell lineage                                 | 3.47E-02 |
| Aldosterone synthesis and secretion                        | 3.53E-02 |
| Taste transduction                                         | 3.72E-02 |
| Pancreatic secretion                                       | 3.76E-02 |
| Hepatitis B                                                | 4.17E-02 |
| Cellular senescence                                        | 4.18E-02 |
| cAMP signaling pathway                                     | 4.54E-02 |
| mRNA surveillance pathway                                  | 4.66E-02 |
| Oxytocin signaling pathway                                 | 4.68E-02 |

| 12 week old                                  |          |                                                        |          |
|----------------------------------------------|----------|--------------------------------------------------------|----------|
| Pathway name                                 | P-value  | Pathway name                                           | P-value  |
| Cell adhesion molecules (CAMs)               | 4.74E-14 | Rap1 signaling pathway                                 | 1.71E-04 |
| Hematopoietic cell lineage                   | 1.09E-10 | Phosphatidylinositol signaling system                  | 2.15E-04 |
| Phagosome                                    | 2.24E-09 | PD-L1 expression and PD-1 checkpoint pathway in cancer | 2.52E-04 |
| Cytokine-cytokine receptor interaction       | 1.12E-08 | MAPK signaling pathway                                 | 4.54E-04 |
| Th17 cell differentiation                    | 1.12E-08 | Regulation of actin cytoskeleton                       | 6.70E-04 |
| Natural killer cell mediated cytotoxicity    | 1.12E-08 | DNA replication                                        | 7.81E-04 |
| Systemic lupus erythematosus                 | 1.12E-08 | Kaposi sarcoma-associated herpesvirus infection        | 7.97E-04 |
| Staphylococcus aureus infection              | 3.20E-08 | Acute myeloid leukemia                                 | 1.09E-03 |
| Primary immunodeficiency                     | 7.79E-08 | MicroRNAs in cancer                                    | 1.72E-03 |
| Leukocyte transendothelial migration         | 8.06E-08 | Platelet activation                                    | 1.79E-03 |
| Chemokine signaling pathway                  | 8.13E-08 | Small cell lung cancer                                 | 2.32E-03 |
| Human T-cell leukemia virus 1 infection      | 9.09E-08 | Viral carcinogenesis                                   | 3.38E-03 |
| NF-kappa B signaling pathway                 | 3.30E-07 | NOD-like receptor signaling pathway                    | 4.24E-03 |
| Pathways in cancer                           | 4.61E-07 | Apoptosis - multiple species                           | 5.13E-03 |
| Antigen processing and presentation          | 4.62E-07 | p53 signaling pathway                                  | 6.61E-03 |
| Inflammatory bowel disease (IBD)             | 6.01E-07 | Homologous recombination                               | 7.61E-03 |
| T cell receptor signaling pathway            | 6.61E-07 | Chagas disease (American trypanosomiasis)              | 8.66E-03 |
| Osteoclast differentiation                   | 1.13E-06 | Melanoma                                               | 8.84E-03 |
| Complement and coagulation cascades          | 2.09E-06 | Adherens junction                                      | 1.14E-02 |
| Pertussis                                    | 2.91E-06 | Inositol phosphate metabolism                          | 1.32E-02 |
| Fc gamma R-mediated phagocytosis             | 3.17E-06 | Cholinergic synapse                                    | 1.38E-02 |
| Viral myocarditis                            | 3.26E-06 | Pancreatic cancer                                      | 1.43E-02 |
| Tuberculosis                                 | 5.15E-06 | Measles                                                | 1.49E-02 |
| Intestinal immune network for IgA production | 5.24E-06 | Central carbon metabolism in cancer                    | 1.54E-02 |
| Apoptosis                                    | 7.53E-06 | Human cytomegalovirus infection                        | 1.65E-02 |
| Ras signaling pathway                        | 8.60E-06 | Hypertrophic cardiomyopathy (HCM)                      | 1.72E-02 |
| Transcriptional misregulation in cancer      | 8.73E-06 | Inflammatory mediator regulation of TRP channels       | 1.93E-02 |
| Graft-versus-host disease                    | 9.83E-06 | Focal adhesion                                         | 1.96E-02 |
| Allograft rejection                          | 1.03E-05 | Non-alcoholic fatty liver disease (NAFLD)              | 2.29E-02 |
| Leishmaniasis                                | 1.05E-05 | Alcoholism                                             | 2.47E-02 |
| Rheumatoid arthritis                         | 1.14E-05 | Oxytocin signaling pathway                             | 2.58E-02 |
| Cell cycle                                   | 1.20E-05 | ECM-receptor interaction                               | 2.76E-02 |
| Toxoplasmosis                                | 1.25E-05 | Salmonella infection                                   | 2.77E-02 |
| Th1 and Th2 cell differentiation             | 1.42E-05 | Chronic myeloid leukemia                               | 2.78E-02 |
| Asthma                                       | 1.88E-05 | Insulin resistance                                     | 2.82E-02 |
| Human Immunodeficiency virus 1 infection     | 2.72E-05 | Vascular smooth muscle contraction                     | 2.94E-02 |
| Epstein-Barr virus infection                 | 4.37E-05 | Proteoglycans in cancer                                | 3.36E-02 |
| Autoimmune thyroid disease                   | 4.90E-05 | AGE-RAGE signaling pathway in diabetic complications   | 3.44E-02 |
| Type I diabetes mellitus                     | 5.80E-05 | TNF signaling pathway                                  | 3.57E-02 |
| JAK-STAT signaling pathway                   | 7.11E-05 | cAMP signaling pathway                                 | 3.99E-02 |
| PI3K-Akt signaling pathway                   | 7.31E-05 | Axon guidance                                          | 4.34E-02 |
| Malaria                                      | 1.12E-04 | Apelin signaling pathway                               | 4.46E-02 |
| IL-17 signaling pathway                      | 1.29E-04 | FoxO signaling pathway                                 | 4.61E-02 |
| Fc epsilon RI signaling pathway              | 1.40E-04 | Nicotinate and nicotinamide metabolism                 | 4.82E-02 |
| B cell receptor signaling pathway            | 1.52E-04 | Dilated cardiomyopathy (DCM)                           | 4.83E-02 |
| C-type lectin receptor signaling pathway     | 1.53E-04 | Base excision repair                                   | 4.91E-02 |
| Cellular senescence                          | 1.56E-04 | Endocytosis                                            | 5.02E-02 |
