# Supplementary material
Source: publisher figshare collection journal article supplement (https://diabetesjournals.figshare.com/articles/dataset/_/19607322)
Supplement: Supplementary file 7 [file 2]

## Checklist for Reporting Human Islet Preparations Used in Research

Adapted from Hart NJ, Powers AC (2018) Progress, challenges, and suggestions for using human islets to understand islet biology and human diabetes. Diabetologia <https://doi.org/10.1007/s00125-018-4772-2>.

|                                                                                                                                                                     |                                                                                        |
|---------------------------------------------------------------------------------------------------------------------------------------------------------------------|----------------------------------------------------------------------------------------|
| <b>Manuscript DOI:</b> <a href="https://doi.org/10.2337/db21-0948">https://doi.org/10.2337/db21-0948</a>                                                            |                                                                                        |
| <b>Title:</b> Identification of novel disease-relevant genes and pathways in the pathogenesis of type 1 diabetes: a potential defect in pancreatic iron homeostasis |                                                                                        |
| <b>Author list:</b> Linda Yip, Reem Alkhataybeh, Cariel Taylor, Rebecca Fuhlbrigge, C. Garrison Fathman                                                             |                                                                                        |
| <b>Corresponding author:</b> Linda Yip                                                                                                                              | <b>Email address:</b> <a href="mailto:lindayip@stanford.edu">lindayip@stanford.edu</a> |

| Islet preparation              | 1    | 2    | 3    | 4 | 5 | 6 | 7 | 8 <sup>a</sup> |
|--------------------------------|------|------|------|---|---|---|---|----------------|
| MANDATORY INFORMATION          |      |      |      |   |   |   |   |                |
| Unique identifier              | R271 | R274 | R314 |   |   |   |   |                |
| Donor age (years)              | 60   | 42   | 54   |   |   |   |   |                |
| Donor sex (M/F)                | F    | M    | M    |   |   |   |   |                |
| Donor BMI (kg/m <sup>2</sup> ) | 25.9 | 25.2 | 26.4 |   |   |   |   |                |

|                                                                             |                    |                    |                    |  |  |  |  |  |
|-----------------------------------------------------------------------------|--------------------|--------------------|--------------------|--|--|--|--|--|
| Donor HbA <sub>1c</sub> or other measure of blood glucose control           | 5.5                | n/a                | 5.1                |  |  |  |  |  |
| Origin/source of islets <sup>b</sup>                                        | Alberta Islet Core | Alberta Islet Core | Alberta Islet Core |  |  |  |  |  |
| Islet isolation centre                                                      | Alberta Islet Core | Alberta Islet Core | Alberta Islet Core |  |  |  |  |  |
| Donor history of diabetes? Yes/No                                           | No                 | No                 | No                 |  |  |  |  |  |
| <b>If Yes, complete the next two lines if this information is available</b> |                    |                    |                    |  |  |  |  |  |
| Diabetes duration (years)                                                   |                    |                    |                    |  |  |  |  |  |
| Glucose-lowering therapy at time of death <sup>c</sup>                      |                    |                    |                    |  |  |  |  |  |

| RECOMMENDED INFORMATION |  |  |  |  |  |  |  |  |
|-------------------------|--|--|--|--|--|--|--|--|
| Donor cause of death    |  |  |  |  |  |  |  |  |
| Warm ischaemia time (h) |  |  |  |  |  |  |  |  |
| Cold ischaemia time (h) |  |  |  |  |  |  |  |  |

|                                                                                   |  |  |  |  |  |  |  |  |
|-----------------------------------------------------------------------------------|--|--|--|--|--|--|--|--|
| Estimated purity (%)                                                              |  |  |  |  |  |  |  |  |
| Estimated viability (%)                                                           |  |  |  |  |  |  |  |  |
| Total culture time (h) <sup>d</sup>                                               |  |  |  |  |  |  |  |  |
| Glucose-stimulated insulin secretion or other functional measurement <sup>e</sup> |  |  |  |  |  |  |  |  |
| Handpicked to purity?<br>Yes/No                                                   |  |  |  |  |  |  |  |  |
| Additional notes                                                                  |  |  |  |  |  |  |  |  |

<sup>a</sup>If you have used more than eight islet preparations, please complete additional forms as necessary

<sup>b</sup>For example, IIDP, ECIT, Alberta IsletCore

<sup>c</sup>Please specify the therapy/therapies

<sup>d</sup>Time of islet culture at the isolation centre, during shipment and at the receiving laboratory

<sup>e</sup>Please specify the test and the results
